# Supplementary material
Source: PubMed Central journal article supplement (PMC7261374)
Supplement: NIHMS1581116-supplement-supplementary.pdf [file NIHMS1581116-supplement-supplementary.pdf]

## Supplementary Material\*

Khan SU, Khan MU, Riaz H, et al. Effects of nutritional supplements and dietary interventions on cardiovascular outcomes. An umbrella review and evidence map. Ann Intern Med. 2019.  
doi:10.7326/M19-0341

| <b>Table of contents</b> | <b>Page</b> |
|--------------------------|-------------|
| I. Tables.....           | 2-58        |
| II. Figures.....         | 59-71       |
| III. References.....     | 72-89       |

\* This supplementary material was provided by the authors to give readers further details on their article. The material was reviewed but not copyedited.

**Supplement Table 1: Search Strategy (PubMed):**

| <b>Literature search till March, 2019 for meta-analyses</b>                    |                                                                                                                                                                                                                                                                                                                                                                                                                                                                                                                                                                                                                                                                                                                                                                                                                                                                                                                                                                                                                                                                                                                                                                                                                                                                                                                                                                                                                                                                                                                                                                                                                                                                                                                                                                                                                                                                                                                                                                                                                                                                                                                                                                                                                                                                                                                                                                                                                                                                                                                                                                                                                                                                                                                                                                                                                                                                                                                                                                                                                                                                                                                                                                                                                                                                                                                                                                                                                                                                                                                                              |                         |
|--------------------------------------------------------------------------------|----------------------------------------------------------------------------------------------------------------------------------------------------------------------------------------------------------------------------------------------------------------------------------------------------------------------------------------------------------------------------------------------------------------------------------------------------------------------------------------------------------------------------------------------------------------------------------------------------------------------------------------------------------------------------------------------------------------------------------------------------------------------------------------------------------------------------------------------------------------------------------------------------------------------------------------------------------------------------------------------------------------------------------------------------------------------------------------------------------------------------------------------------------------------------------------------------------------------------------------------------------------------------------------------------------------------------------------------------------------------------------------------------------------------------------------------------------------------------------------------------------------------------------------------------------------------------------------------------------------------------------------------------------------------------------------------------------------------------------------------------------------------------------------------------------------------------------------------------------------------------------------------------------------------------------------------------------------------------------------------------------------------------------------------------------------------------------------------------------------------------------------------------------------------------------------------------------------------------------------------------------------------------------------------------------------------------------------------------------------------------------------------------------------------------------------------------------------------------------------------------------------------------------------------------------------------------------------------------------------------------------------------------------------------------------------------------------------------------------------------------------------------------------------------------------------------------------------------------------------------------------------------------------------------------------------------------------------------------------------------------------------------------------------------------------------------------------------------------------------------------------------------------------------------------------------------------------------------------------------------------------------------------------------------------------------------------------------------------------------------------------------------------------------------------------------------------------------------------------------------------------------------------------------------|-------------------------|
| <p>Search string for meta-analyses<br/>(Results = 498)</p>                     | <p>((("minerals"[MeSH Terms] OR "minerals"[All Fields]) OR ("vitamins"[Pharmacological Action] OR "vitamins"[MeSH Terms] OR "vitamins"[All Fields]) OR ("diet"[MeSH Terms] OR "diet"[All Fields]) AND (("cardiovascular system"[MeSH Terms] OR "cardiovascular"[All Fields] AND "system"[All Fields]) OR "cardiovascular system"[All Fields] OR "cardiovascular"[All Fields]) AND outcomes[All Fields])) AND ((meta analysis[All Fields] OR meta analysis[All Fields] OR meta analysable[All Fields] OR meta analysas[All Fields] OR meta analyse[All Fields] OR meta analysed[All Fields] OR meta analysei[All Fields] OR meta analysen[All Fields] OR meta analyser[All Fields] OR meta analysers[All Fields] OR meta analyses[All Fields] OR meta analysescohort[All Fields] OR meta analysespublication[All Fields] OR meta analysestype[All Fields] OR meta analysi[All Fields] OR meta analysisia[All Fields] OR meta analysisic[All Fields] OR meta analysing[All Fields] OR meta analysis[All Fields] OR meta analysis's[All Fields] OR meta analysis,[All Fields] OR meta analysis2[All Fields] OR meta analysis2011[All Fields] OR meta analysisas[All Fields] OR meta analysisbone[All Fields] OR meta analysisc[All Fields] OR meta analysisdagger[All Fields] OR meta analyses[All Fields] OR meta analysevaluating[All Fields] OR meta analysisif[All Fields] OR meta analysisindicated[All Fields] OR meta analysisintroduction[All Fields] OR meta analysisjr[All Fields] OR meta analysismethods[All Fields] OR meta analysismoderate[All Fields] OR meta analysisof[All Fields] OR meta analysistrade[All Fields] OR meta analysisv[All Fields] OR meta analysiswas[All Fields] OR meta analysisxs[All Fields] OR meta analyzed[All Fields] OR meta analyst[All Fields] OR meta analysticians[All Fields] OR meta analysts[All Fields] OR meta analysys[All Fields] OR meta analytic[All Fields] OR meta analytical[All Fields] OR meta analytically[All Fields] OR meta analytics[All Fields] OR meta analytischer[All Fields] OR meta analyysit[All Fields] OR meta analyza[All Fields] OR meta analizability[All Fields] OR meta analizable[All Fields] OR meta analyze[All Fields] OR meta analyzed[All Fields] OR meta analyzes[All Fields] OR meta analyzing[All Fields]) OR (metaanalys[All Fields] OR metaanalyse[All Fields] OR metaanalysed[All Fields] OR metaanalysen[All Fields] OR metaanalyser[All Fields] OR metaanalyses[All Fields] OR metaanalyses'[All Fields] OR metaanalysis[All Fields] OR metaanalysis'[All Fields] OR metaanalysisbased[All Fields] OR metaanalysisdata[All Fields] OR metaanalyst[All Fields] OR metaanalytic[All Fields] OR metaanalytical[All Fields] OR metaanalytically[All Fields] OR metaanalytique[All Fields] OR metaanalytische[All Fields] OR metaanalytischen[All Fields] OR metaanalytischer[All Fields] OR metaanalytisk[All Fields] OR metaanalyza[All Fields] OR metaanalyze[All Fields] OR metaanalyzed[All Fields] OR metaanalyzedall[All Fields] OR metaanalyzing[All Fields] OR metaanalyzy[All Fields]) OR (systematic review[All Fields] OR systematic review,[All Fields] OR systematic reviewbeta[All Fields] OR systematic reviewer[All Fields] OR systematic reviewers[All Fields] OR systematic reviewing[All Fields] OR systematic reviewn[All Fields] OR systematic reviewobjective[All Fields] OR systematic reviews[All Fields] OR systematic reviewvsp[All Fields])) AND (("0001/01/01"[PDAT] : "2019/03/01"[PDAT]) AND "humans"[MeSH Terms])</p> |                         |
| <b>Literature search timelines of selected systematic reviews</b>              |                                                                                                                                                                                                                                                                                                                                                                                                                                                                                                                                                                                                                                                                                                                                                                                                                                                                                                                                                                                                                                                                                                                                                                                                                                                                                                                                                                                                                                                                                                                                                                                                                                                                                                                                                                                                                                                                                                                                                                                                                                                                                                                                                                                                                                                                                                                                                                                                                                                                                                                                                                                                                                                                                                                                                                                                                                                                                                                                                                                                                                                                                                                                                                                                                                                                                                                                                                                                                                                                                                                                              |                         |
| <b>Author (Year), Journal</b>                                                  | <b>Selected intervention(s)</b>                                                                                                                                                                                                                                                                                                                                                                                                                                                                                                                                                                                                                                                                                                                                                                                                                                                                                                                                                                                                                                                                                                                                                                                                                                                                                                                                                                                                                                                                                                                                                                                                                                                                                                                                                                                                                                                                                                                                                                                                                                                                                                                                                                                                                                                                                                                                                                                                                                                                                                                                                                                                                                                                                                                                                                                                                                                                                                                                                                                                                                                                                                                                                                                                                                                                                                                                                                                                                                                                                                              | <b>Search timeline</b>  |
| <p>Jenkins D et al., (2018) (1), Journal of American College of Cardiology</p> | <p>Antioxidants; β-carotene; vitamin B-complex; multivitamins; selenium; vitamin A; vitamin B3/Niacin;</p>                                                                                                                                                                                                                                                                                                                                                                                                                                                                                                                                                                                                                                                                                                                                                                                                                                                                                                                                                                                                                                                                                                                                                                                                                                                                                                                                                                                                                                                                                                                                                                                                                                                                                                                                                                                                                                                                                                                                                                                                                                                                                                                                                                                                                                                                                                                                                                                                                                                                                                                                                                                                                                                                                                                                                                                                                                                                                                                                                                                                                                                                                                                                                                                                                                                                                                                                                                                                                                   | <p>01/2012- 10/2017</p> |

|                                                                           |                                                                                             |                     |
|---------------------------------------------------------------------------|---------------------------------------------------------------------------------------------|---------------------|
|                                                                           | vitamin B6; vitamin C; vitamin E; vitamin D; calcium + vitamin D; calcium; folic acid; iron |                     |
| Riaz H et al., (2018) (2), European Journal of Preventive Cardiology      | Vitamin B3/Niacin                                                                           | Inception- 01/2018  |
| Abdelhamid AS et al., (2018) (3), Cochrane Database of Systematic Reviews | n-3 LC PUFA and n- 3 (ALA) PUFA                                                             | Inception – 04/2017 |
| Hooper L et al., (2018) (4), Cochrane Database of Systematic Reviews      | n-6 PUFA                                                                                    | Inception – 05/2017 |
| Liyanage T et al. (2016) (5), Plos One                                    | Mediterranean diet                                                                          | Inception – 02/2014 |
| Adler AJ et al., (2014) (6), Cochrane Database of Systematic Reviews      | Reduced salt (normotensives or hypertensives)                                               | Inception – 05/2013 |
| Mente A et al., (2016) (7), Lancet                                        | Reduced salt (normotensives or hypertensives)                                               | 01/1960- 04/2016    |
| Hooper L et al., (2011) (8), Cochrane Database of Systematic Reviews      | Modified or reduced dietary fat intake                                                      | Inception – 06/2010 |
| Hooper L et al. (2015) (9), Cochrane Database of Systematic Reviews       | Reduced saturated fat intake                                                                | Inception- 03/2014  |

#### Updated search

Search string for supplemental vitamins and minerals  
(Results = 446)

(dietary supplements[All Fields] OR (vitamins[All Fields] OR vitamins'[All Fields] OR vitaminsa[All Fields] OR vitaminsabcdek[All Fields] OR vitaminsfor[All Fields] OR vitaminska[All Fields] OR vitaminske[All Fields] OR vitaminskih[All Fields] OR vitaminskoj[All Fields] OR vitaminsoderzhashchikh[All Fields] OR vitaminsparenden[All Fields] OR vitaminspritzen[All Fields] OR vitaminstandard[All Fields] OR vitaminstatus[All Fields] OR vitaminstoffwechsel[All Fields] OR vitaminsubstitution[All Fields] OR vitaminsubstitutionstherapie[All Fields] OR vitaminsupplemente[All Fields] OR vitaminsupplementierung[All Fields] OR vitaminsynthese[All Fields] OR vitaminsyre[All Fields] OR vitaminszukseglete[All Fields]) OR (minerals[All Fields] OR minerals'[All Fields] OR mineralsalt[All Fields] OR mineralsalz[All Fields] OR mineralsalzausscheidung[All Fields] OR mineralsalzbader[All Fields] OR mineralsalzbestimmung[All Fields] OR mineralsalzbestimmungen[All Fields] OR mineralsalzdefizits[All Fields] OR mineralsalzdichte[All Fields] OR mineralsalze[All Fields] OR mineralsalzen[All Fields] OR mineralsalzfrage[All Fields] OR mineralsalzgehaltes[All Fields] OR mineralsalzgehaltsbestimmung[All Fields] OR mineralsalzgemischen[All Fields] OR mineralsalzlosung[All Fields] OR mineralsalzmangelercheinungen[All Fields] OR mineralsalzmasse[All Fields] OR mineralsalzmischungen[All Fields] OR mineralsalzquelle[All Fields] OR mineralsalzverlust[All Fields] OR mineralsalzversorgung[All Fields] OR mineralsauren[All Fields] OR mineralsaurer[All Fields] OR mineralschalen[All Fields] OR mineralsdhahran[All Fields] OR mineralses[All Fields] OR mineralsfortified[All Fields] OR mineralsk[All Fields] OR mineralspiegel[All Fields] OR mineralsplus[All Fields] OR mineralstaub[All Fields] OR mineralstaubgehalt[All Fields] OR mineralstoff[All Fields] OR mineralstoffanalyse[All Fields] OR mineralstoffangebot[All Fields] OR mineralstoffausscheidung[All Fields] OR mineralstoffbedarf[All Fields] OR mineralstoffbestimmung[All Fields] OR mineralstoffbilanz[All Fields] OR mineralstoffdungung[All Fields] OR mineralstoffe[All Fields] OR mineralstoffen[All Fields] OR mineralstoffer[All Fields] OR mineralstofferganzung[All Fields] OR mineralstoffgehalf[All Fields] OR

mineralstoffgehalt[All Fields] OR mineralstoffgehalte[All Fields] OR  
 mineralstoffgehalten[All Fields] OR mineralstoffgehaltes[All Fields] OR  
 mineralstoffgemisches[All Fields] OR mineralstoffhaushalt[All Fields] OR  
 mineralstoffkonzentrationen[All Fields] OR mineralstoffmangel[All Fields] OR  
 mineralstoffmangelbedingter[All Fields] OR mineralstoffmangelerscheinungen[All Fields]  
 OR mineralstoffmischungen[All Fields] OR mineralstoffreier[All Fields] OR  
 mineralstoffstoffwechsel[All Fields] OR mineralstoffstorungen[All Fields] OR  
 mineralstoffsupplementierung[All Fields] OR mineralstoffumsatz[All Fields] OR  
 mineralstoffumsatzes[All Fields] OR mineralstofffutterung[All Fields] OR  
 mineralstoffverarmung[All Fields] OR mineralstoffversorgung[All Fields] OR  
 mineralstoffwechsel[All Fields] OR mineralstoffwechselparameter[All Fields] OR  
 mineralstoffwechsels[All Fields] OR mineralstoffwechselstoerung[All Fields] OR  
 mineralstoffwechselstorungen[All Fields] OR mineralstoffwechselstudien[All Fields] OR  
 mineralstoffwechselvorgange[All Fields] OR mineralstoffwechselwirkung[All Fields] OR  
 mineralstoffwirkung[All Fields] OR mineralstoffzufuhr[All Fields] OR  
 mineralstoffzusammensetzung[All Fields] OR mineralstorungen[All Fields] OR  
 mineralstrukturen[All Fields] OR mineralsubstanz[All Fields] OR mineralsubstanzen[All  
 Fields] OR mineralsubstitution[All Fields] OR mineralsyrrors[All Fields])) AND ((myocardial  
 infarction[All Fields] OR myocardial infarction,[All Fields] OR myocardial infarctionl[All  
 Fields] OR myocardial infarctions[All Fields]) OR (stroke[All Fields] OR stroke'[All Fields]  
 OR stroke"[All Fields] OR stroke's[All Fields] OR stroke,[All Fields] OR stroke119[All Fields]  
 OR stroke123[All Fields] OR stroke2[All Fields] OR stroke2000[All Fields] OR  
 stroke2010[All Fields] OR stroke34[All Fields] OR stroke4carers[All Fields] OR stroke`s[All  
 Fields] OR strokea[All Fields] OR strokeaetiology[All Fields] OR strokeaha[All Fields] OR  
 strokeaha118020087[All Fields] OR strokeaha118020840[All Fields] OR  
 strokeaha118021381[All Fields] OR strokeaha118021407[All Fields] OR  
 strokeaha118021453[All Fields] OR strokeaha118021598[All Fields] OR  
 strokeaha118021798[All Fields] OR strokeaha118022088[All Fields] OR  
 strokeaha118022239[All Fields] OR strokeaha118022249[All Fields] OR  
 strokeaha118022315[All Fields] OR strokeaha118022332[All Fields] OR  
 strokeaha118022404[All Fields] OR strokeaha118022406[All Fields] OR  
 strokeaha118022423[All Fields] OR strokeaha118022454[All Fields] OR  
 strokeaha118022516[All Fields] OR strokeaha118022563[All Fields] OR  
 strokeaha118022644[All Fields] OR strokeaha118022687[All Fields] OR  
 strokeaha118022691[All Fields] OR strokeaha118022745[All Fields] OR  
 strokeaha118022913[All Fields] OR strokeaha118022923[All Fields] OR  
 strokeaha118023006[All Fields] OR strokeaha118023058[All Fields] OR  
 strokeaha118023060[All Fields] OR strokeaha118023079[All Fields] OR  
 strokeaha118023084[All Fields] OR strokeaha118023088[All Fields] OR  
 strokeaha118023093[All Fields] OR strokeaha118023385[All Fields] OR  
 strokeaha118023456[All Fields] OR strokeaha118023457[All Fields] OR  
 strokeaha118023465[All Fields] OR strokeaha118023482[All Fields] OR  
 strokeaha118023506[All Fields] OR strokeaha118023527[All Fields] OR  
 strokeaha118023573[All Fields] OR strokeaha118023640[All Fields] OR  
 strokeaha118023696[All Fields] OR strokeaha118023701[All Fields] OR  
 strokeaha118023702[All Fields] OR strokeaha118023712[All Fields] OR  
 strokeaha118023724[All Fields] OR strokeaha118023744[All Fields] OR  
 strokeaha118023749[All Fields] OR strokeaha118023789[All Fields] OR

strokeaha118023790[All Fields] OR strokeaha118023830[All Fields] OR  
 strokeaha118023850[All Fields] OR strokeaha118023866[All Fields] OR  
 strokeaha118023953[All Fields] OR strokeaha118023955[All Fields] OR  
 strokeaha118023990[All Fields] OR strokeaha118024028[All Fields] OR  
 strokeaha118024134[All Fields] OR strokeaha118024232[All Fields] OR  
 strokeaha118024442[All Fields] OR strokeand[All Fields] OR strokecarecontents[All  
 Fields] OR strokecenter[All Fields] OR strokecentre[All Fields] OR strokechecklist[All  
 Fields] OR strokeclose[All Fields] OR strokect[All Fields] OR strokectacomputed[All Fields]  
 OR strokectcomputed[All Fields] OR strokectomy[All Fields] OR stroked[All Fields] OR  
 strokeddepartment[All Fields] OR strokedepressive[All Fields] OR strokededge[All Fields] OR  
 strokeddiagnostik[All Fields] OR strokedoc[All Fields] OR strokedrabbade[All Fields] OR  
 strokeearly[All Fields] OR strokeed[All Fields] OR strokeelicited[All Fields] OR  
 strokeenh[All Fields] OR strokeenheten[All Fields] OR strokefall[All Fields] OR  
 strokefobreyggande[All Fields] OR strokefoundation[All Fields] OR strokefree[All Fields]  
 OR strokefrom[All Fields] OR strokehip[All Fields] OR strokein[All Fields] OR  
 strokeinduced[All Fields] OR strokeintracerebral[All Fields] OR strokelets[All Fields] OR  
 strokelike[All Fields] OR strokelink[All Fields] OR strokelocated[All Fields] OR  
 strokemerci[All Fields] OR strokemethods[All Fields] OR strokemobile[All Fields] OR  
 stroken[All Fields] OR strokenational[All Fields] OR strokenet[All Fields] OR  
 strokengine[All Fields] OR strokengine's[All Fields] OR strokenomics[All Fields] OR  
 strokenomics'[All Fields] OR strokepatienter[All Fields] OR strokepatients[All Fields] OR  
 strokepharmacogenomics[All Fields] OR strokeplane[All Fields] OR strokeprevention[All  
 Fields] OR strokeprofylax[All Fields] OR strokeprofylaxen[All Fields] OR strokeproject[All  
 Fields] OR strokeprone[All Fields] OR stroker[All Fields] OR strokerehab[All Fields] OR  
 strokerehabilitering[All Fields] OR strokerisk[All Fields] OR strokers[All Fields] OR  
 strokerwin[All Fields] OR strokes[All Fields] OR strokes'[All Fields] OR strokes1[All Fields]  
 OR strokesafe[All Fields] OR strokesand[All Fields] OR strokesektionen[All Fields] OR  
 strokesfuture[All Fields] OR strokesich[All Fields] OR strokeskydd[All Fields] OR  
 strokesmin[All Fields] OR strokestop[All Fields] OR strokestra[All Fields] OR  
 strokestudygz[All Fields] OR strokethree[All Fields] OR stroketool[All Fields] OR  
 stroketrials[All Fields] OR strokeun[All Fields] OR strokeunit[All Fields] OR strokevan[All  
 Fields] OR strokevard[All Fields] OR strokevarden[All Fields] OR strokevia[All Fields] OR  
 strokevision[All Fields] OR strokevolume[All Fields] OR strokevolumedon[All Fields] OR  
 strokevolumes[All Fields] OR strokewidth[All Fields] OR strokework[All Fields] OR  
 strokezero[All Fields]) OR (mortality[All Fields] OR mortality'[All Fields] OR mortality"[All  
 Fields] OR mortality's[All Fields] OR mortality,[All Fields] OR mortality1[All Fields] OR  
 mortality12[All Fields] OR mortality19[All Fields] OR mortality1965[All Fields] OR  
 mortality2[All Fields] OR mortalityabc[All Fields] OR mortalityagainst[All Fields] OR  
 mortalityall[All Fields] OR mortalityand[All Fields] OR mortalityat[All Fields] OR  
 mortalitydagger[All Fields] OR mortalityfor[All Fields] OR mortalityhf[All Fields] OR  
 mortalityin[All Fields] OR mortalityinterval[All Fields] OR mortalityinthe[All Fields] OR  
 mortalitynrmand[All Fields] OR mortalityof[All Fields] OR mortalityon[All Fields] OR  
 mortalitypredictors[All Fields] OR mortalityrate[All Fields] OR mortalityrates[All Fields]  
 OR mortalityrelated[All Fields] OR mortalityresearch[All Fields] OR  
 mortalitysahsubarachnoid[All Fields] OR mortalitystudy[All Fields] OR  
 mortalitysuggests[All Fields] OR mortalitythat[All Fields] OR mortalitythree[All Fields] OR  
 mortalitytrm[All Fields] OR mortalitytrmin[All Fields] OR mortalitywas[All Fields] OR  
 mortalitywith[All Fields] OR mortalityworldwide[All Fields] OR mortalityyyy[All Fields]) OR

|                                                                            |                                                                                                                                                                                                                                                                                                                                                                                                                                                                                                                                                                                                                                                                                                                                                                                                                                                                                                                                                                                                                                                                                                                                                                                                                                                                                                                                                                                                                                                                                                                                                                                                                                                                                                                                                                                                                                                                                                                                                                                                                                                                                                                                                                                                                                                                                                                                                                                                                                                                                                                                                                                                                                                                                                                                                                                                                                                                                                                                                                                                                                                                                                                                                                                                                                                                                                                                                                                                                                                  |
|----------------------------------------------------------------------------|--------------------------------------------------------------------------------------------------------------------------------------------------------------------------------------------------------------------------------------------------------------------------------------------------------------------------------------------------------------------------------------------------------------------------------------------------------------------------------------------------------------------------------------------------------------------------------------------------------------------------------------------------------------------------------------------------------------------------------------------------------------------------------------------------------------------------------------------------------------------------------------------------------------------------------------------------------------------------------------------------------------------------------------------------------------------------------------------------------------------------------------------------------------------------------------------------------------------------------------------------------------------------------------------------------------------------------------------------------------------------------------------------------------------------------------------------------------------------------------------------------------------------------------------------------------------------------------------------------------------------------------------------------------------------------------------------------------------------------------------------------------------------------------------------------------------------------------------------------------------------------------------------------------------------------------------------------------------------------------------------------------------------------------------------------------------------------------------------------------------------------------------------------------------------------------------------------------------------------------------------------------------------------------------------------------------------------------------------------------------------------------------------------------------------------------------------------------------------------------------------------------------------------------------------------------------------------------------------------------------------------------------------------------------------------------------------------------------------------------------------------------------------------------------------------------------------------------------------------------------------------------------------------------------------------------------------------------------------------------------------------------------------------------------------------------------------------------------------------------------------------------------------------------------------------------------------------------------------------------------------------------------------------------------------------------------------------------------------------------------------------------------------------------------------------------------------|
|                                                                            | (cardiovascular disease[All Fields] OR cardiovascular disease's[All Fields] OR cardiovascular disease,[All Fields] OR cardiovascular diseased[All Fields] OR cardiovascular diseases[All Fields]) AND (Clinical Trial[ptyp] AND ("2017/01/01"[PDAT] : "2019/03/01"[PDAT]) AND "humans"[MeSH Terms])                                                                                                                                                                                                                                                                                                                                                                                                                                                                                                                                                                                                                                                                                                                                                                                                                                                                                                                                                                                                                                                                                                                                                                                                                                                                                                                                                                                                                                                                                                                                                                                                                                                                                                                                                                                                                                                                                                                                                                                                                                                                                                                                                                                                                                                                                                                                                                                                                                                                                                                                                                                                                                                                                                                                                                                                                                                                                                                                                                                                                                                                                                                                              |
| <p>Search string for n-3 LC PUFA and n-3 [ALA] PUFA<br/>(Results = 82)</p> | <p>omega 3 fatty acids[All Fields] AND ((myocardial infarction[All Fields] OR myocardial infarction,[All Fields] OR myocardial infarctionl[All Fields] OR myocardial infarctions[All Fields]) OR (stroke[All Fields] OR stroke'[All Fields] OR stroke"[All Fields] OR stroke's[All Fields] OR stroke,[All Fields] OR stroke19[All Fields] OR stroke123[All Fields] OR stroke2[All Fields] OR stroke2000[All Fields] OR stroke2010[All Fields] OR stroke34[All Fields] OR stroke4carers[All Fields] OR stroke`s[All Fields] OR strokea[All Fields] OR strokeaetiology[All Fields] OR strokeaha[All Fields] OR strokeaha118020087[All Fields] OR strokeaha118020840[All Fields] OR strokeaha118021381[All Fields] OR strokeaha118021407[All Fields] OR strokeaha118021453[All Fields] OR strokeaha118021598[All Fields] OR strokeaha118021798[All Fields] OR strokeaha118022088[All Fields] OR strokeaha118022239[All Fields] OR strokeaha118022249[All Fields] OR strokeaha118022315[All Fields] OR strokeaha118022332[All Fields] OR strokeaha118022404[All Fields] OR strokeaha118022406[All Fields] OR strokeaha118022423[All Fields] OR strokeaha118022454[All Fields] OR strokeaha118022516[All Fields] OR strokeaha118022563[All Fields] OR strokeaha118022644[All Fields] OR strokeaha118022687[All Fields] OR strokeaha118022691[All Fields] OR strokeaha118022745[All Fields] OR strokeaha118022913[All Fields] OR strokeaha118022923[All Fields] OR strokeaha118023006[All Fields] OR strokeaha118023058[All Fields] OR strokeaha118023060[All Fields] OR strokeaha118023079[All Fields] OR strokeaha118023084[All Fields] OR strokeaha118023088[All Fields] OR strokeaha118023093[All Fields] OR strokeaha118023385[All Fields] OR strokeaha118023456[All Fields] OR strokeaha118023457[All Fields] OR strokeaha118023465[All Fields] OR strokeaha118023482[All Fields] OR strokeaha118023506[All Fields] OR strokeaha118023527[All Fields] OR strokeaha118023573[All Fields] OR strokeaha118023640[All Fields] OR strokeaha118023696[All Fields] OR strokeaha118023701[All Fields] OR strokeaha118023702[All Fields] OR strokeaha118023712[All Fields] OR strokeaha118023724[All Fields] OR strokeaha118023744[All Fields] OR strokeaha118023749[All Fields] OR strokeaha118023789[All Fields] OR strokeaha118023790[All Fields] OR strokeaha118023830[All Fields] OR strokeaha118023850[All Fields] OR strokeaha118023866[All Fields] OR strokeaha118023953[All Fields] OR strokeaha118023955[All Fields] OR strokeaha118023990[All Fields] OR strokeaha118024028[All Fields] OR strokeaha118024134[All Fields] OR strokeaha118024232[All Fields] OR strokeaha118024442[All Fields] OR strokeand[All Fields] OR strokecarecontents[All Fields] OR strokecenter[All Fields] OR strokecentre[All Fields] OR strokechecklist[All Fields] OR strokeclose[All Fields] OR strokect[All Fields] OR strokectacomputed[All Fields] OR strokectcomputed[All Fields] OR strokectomy[All Fields] OR stroked[All Fields] OR strokedepartment[All Fields] OR strokedepressive[All Fields] OR strokedge[All Fields] OR strokediagnostik[All Fields] OR strokedoc[All Fields] OR strokedrabbade[All Fields] OR strokeearly[All Fields] OR strokeed[All Fields] OR strokeelicited[All Fields] OR strokeenh[All Fields] OR strokeenheten[All Fields] OR strokefall[All Fields] OR strokefobreybyggande[All Fields] OR strokefoundation[All Fields]</p> |

|                                                      |                                                                                                                                                                                                                                                                                                                                                                                                                                                                                                                                                                                                                                                                                                                                                                                                                                                                                                                                                                                                                                                                                                                                                                                                                                                                                                                                                                                                                                                                                                                                                                                                                                                                                                                                                                                                                                                                                                                                                                                                                                                                                                                                                                                                                                                                                                                                                                                                                                                                                                                                                                                                                                                                                                                                                                                                                                                                                                                                                                                                                                                                                                                                                                                                                                                                                                                                                                  |
|------------------------------------------------------|------------------------------------------------------------------------------------------------------------------------------------------------------------------------------------------------------------------------------------------------------------------------------------------------------------------------------------------------------------------------------------------------------------------------------------------------------------------------------------------------------------------------------------------------------------------------------------------------------------------------------------------------------------------------------------------------------------------------------------------------------------------------------------------------------------------------------------------------------------------------------------------------------------------------------------------------------------------------------------------------------------------------------------------------------------------------------------------------------------------------------------------------------------------------------------------------------------------------------------------------------------------------------------------------------------------------------------------------------------------------------------------------------------------------------------------------------------------------------------------------------------------------------------------------------------------------------------------------------------------------------------------------------------------------------------------------------------------------------------------------------------------------------------------------------------------------------------------------------------------------------------------------------------------------------------------------------------------------------------------------------------------------------------------------------------------------------------------------------------------------------------------------------------------------------------------------------------------------------------------------------------------------------------------------------------------------------------------------------------------------------------------------------------------------------------------------------------------------------------------------------------------------------------------------------------------------------------------------------------------------------------------------------------------------------------------------------------------------------------------------------------------------------------------------------------------------------------------------------------------------------------------------------------------------------------------------------------------------------------------------------------------------------------------------------------------------------------------------------------------------------------------------------------------------------------------------------------------------------------------------------------------------------------------------------------------------------------------------------------------|
|                                                      | <p>OR strokefree[All Fields] OR strokefrom[All Fields] OR strokehip[All Fields] OR strokein[All Fields] OR strokeinduced[All Fields] OR strokeintracerebral[All Fields] OR strokelets[All Fields] OR strokelike[All Fields] OR strokelink[All Fields] OR strokelocated[All Fields] OR strokemerci[All Fields] OR strokemethods[All Fields] OR strokemobile[All Fields] OR stroken[All Fields] OR strokenational[All Fields] OR strokenet[All Fields] OR strokengine[All Fields] OR strokengine's[All Fields] OR strokenomics[All Fields] OR strokenomics'[All Fields] OR strokepatienter[All Fields] OR strokepatients[All Fields] OR strokepharmacogenomics[All Fields] OR strokeplane[All Fields] OR strokeprevention[All Fields] OR strokeprohylax[All Fields] OR strokeprohylaxen[All Fields] OR strokeproject[All Fields] OR strokeprone[All Fields] OR stroker[All Fields] OR strokerehab[All Fields] OR strokerehabilitating[All Fields] OR strokerisk[All Fields] OR strokers[All Fields] OR strokerwin[All Fields] OR strokes[All Fields] OR strokes'[All Fields] OR strokes1[All Fields] OR strokesafe[All Fields] OR strokesand[All Fields] OR strokesektionen[All Fields] OR strokesfuture[All Fields] OR strokesich[All Fields] OR strokeskydd[All Fields] OR strokesmin[All Fields] OR strokestop[All Fields] OR strokestra[All Fields] OR strokestudygz[All Fields] OR strokethree[All Fields] OR stroketool[All Fields] OR stroketrials[All Fields] OR strokeun[All Fields] OR strokeunit[All Fields] OR strokevan[All Fields] OR strokevard[All Fields] OR strokevar den[All Fields] OR strokevia[All Fields] OR strokevision[All Fields] OR strokevolume[All Fields] OR strokevolumedon[All Fields] OR strokevolumes[All Fields] OR strokewidth[All Fields] OR strokework[All Fields] OR strokezero[All Fields]) OR (mortality[All Fields] OR mortality'[All Fields] OR mortality''[All Fields] OR mortality's[All Fields] OR mortality,[All Fields] OR mortality1[All Fields] OR mortality12[All Fields] OR mortality19[All Fields] OR mortality1965[All Fields] OR mortality2[All Fields] OR mortalityabc[All Fields] OR mortalityagainst[All Fields] OR mortalityall[All Fields] OR mortalityand[All Fields] OR mortalityat[All Fields] OR mortalitydagger[All Fields] OR mortalityfor[All Fields] OR mortalityhf[All Fields] OR mortalityin[All Fields] OR mortalityinterval[All Fields] OR mortalityinthe[All Fields] OR mortalitynrmand[All Fields] OR mortalityof[All Fields] OR mortalityon[All Fields] OR mortalitypredictors[All Fields] OR mortalityrate[All Fields] OR mortalityrates[All Fields] OR mortalityrelated[All Fields] OR mortalityresearch[All Fields] OR mortalitysahsubarachnoid[All Fields] OR mortalitystudy[All Fields] OR mortalitysuggests[All Fields] OR mortalitythat[All Fields] OR mortalitythree[All Fields] OR mortalitytrm[All Fields] OR mortalitytrmin[All Fields] OR mortalitywas[All Fields] OR mortalitywith[All Fields] OR mortalityworldwide[All Fields] OR mortalityyyy[All Fields]) OR (cardiovascular disease[All Fields] OR cardiovascular disease's[All Fields] OR cardiovascular disease,[All Fields] OR cardiovascular diseased[All Fields] OR cardiovascular diseases[All Fields])) AND (Clinical Trial[ptyp] AND ("2017/01/01"[PDAT] : "2019/03/01"[PDAT]) AND "humans"[MeSH Terms])</p> |
| <p>Search string for n- 6 PUFA<br/>(Results = 9)</p> | <p>omega 6 fatty acids[All Fields] AND ((myocardial infarction[All Fields] OR myocardial infarction,[All Fields] OR myocardial infarctionl[All Fields] OR myocardial infarctions[All Fields]) OR (stroke[All Fields] OR stroke'[All Fields] OR stroke''[All Fields] OR stroke's[All Fields] OR stroke,[All Fields] OR stroke119[All Fields] OR stroke123[All Fields] OR stroke2[All Fields] OR stroke2000[All Fields] OR stroke2010[All Fields] OR stroke34[All Fields] OR stroke4carers[All Fields] OR stroke`s[All Fields] OR strokea[All Fields] OR strokeaetiology[All Fields] OR strokeaha[All Fields] OR strokeaha118020087[All Fields] OR strokeaha118020840[All Fields] OR strokeaha118021381[All Fields] OR strokeaha118021407[All Fields] OR strokeaha118021453[All Fields] OR strokeaha118021598[All Fields] OR strokeaha118021798[All Fields] OR</p>                                                                                                                                                                                                                                                                                                                                                                                                                                                                                                                                                                                                                                                                                                                                                                                                                                                                                                                                                                                                                                                                                                                                                                                                                                                                                                                                                                                                                                                                                                                                                                                                                                                                                                                                                                                                                                                                                                                                                                                                                                                                                                                                                                                                                                                                                                                                                                                                                                                                                                 |





|                                                                 |                                                                                                                                                                                                                                                                                                                                                                                                                                                                                                                                                                                                                                                                                                                                                                                                                                                                                                                                                                                                                                                                                                                                                                                                                                                                                                                                                                                                                                                                                                                                                                                                                                                                                                                                                                                                                                                                                                                                                                                                                                                                                         |
|-----------------------------------------------------------------|-----------------------------------------------------------------------------------------------------------------------------------------------------------------------------------------------------------------------------------------------------------------------------------------------------------------------------------------------------------------------------------------------------------------------------------------------------------------------------------------------------------------------------------------------------------------------------------------------------------------------------------------------------------------------------------------------------------------------------------------------------------------------------------------------------------------------------------------------------------------------------------------------------------------------------------------------------------------------------------------------------------------------------------------------------------------------------------------------------------------------------------------------------------------------------------------------------------------------------------------------------------------------------------------------------------------------------------------------------------------------------------------------------------------------------------------------------------------------------------------------------------------------------------------------------------------------------------------------------------------------------------------------------------------------------------------------------------------------------------------------------------------------------------------------------------------------------------------------------------------------------------------------------------------------------------------------------------------------------------------------------------------------------------------------------------------------------------------|
|                                                                 | <p>strokesmin[All Fields] OR strokestop[All Fields] OR strokestra[All Fields] OR strokestudygz[All Fields] OR strokethree[All Fields] OR stroketool[All Fields] OR stroketrials[All Fields] OR strokeun[All Fields] OR strokeunit[All Fields] OR strokevan[All Fields] OR strokevard[All Fields] OR strokevarden[All Fields] OR strokevia[All Fields] OR strokevision[All Fields] OR strokevolume[All Fields] OR strokevolumedon[All Fields] OR strokevolumes[All Fields] OR strokewidth[All Fields] OR strokework[All Fields] OR strokezero[All Fields]) OR (mortality[All Fields] OR mortality'[All Fields] OR mortality''[All Fields] OR mortality's[All Fields] OR mortality,[All Fields] OR mortality1[All Fields] OR mortality12[All Fields] OR mortality19[All Fields] OR mortality1965[All Fields] OR mortality2[All Fields] OR mortalityabc[All Fields] OR mortalityagainst[All Fields] OR mortalityall[All Fields] OR mortalityand[All Fields] OR mortalityat[All Fields] OR mortalitydagger[All Fields] OR mortalityfor[All Fields] OR mortalityhf[All Fields] OR mortalityin[All Fields] OR mortalityinterval[All Fields] OR mortalityinthe[All Fields] OR mortalitynrmand[All Fields] OR mortalityof[All Fields] OR mortalityon[All Fields] OR mortalitypredictors[All Fields] OR mortalityrate[All Fields] OR mortalityrates[All Fields] OR mortalityrelated[All Fields] OR mortalityresearch[All Fields] OR mortalitysahsubarachnoid[All Fields] OR mortalitystudy[All Fields] OR mortalitysuggests[All Fields] OR mortalitythat[All Fields] OR mortalitythree[All Fields] OR mortalitytrm[All Fields] OR mortalitytrmin[All Fields] OR mortalitywas[All Fields] OR mortalitywith[All Fields] OR mortalityworldwide[All Fields] OR mortalityyyy[All Fields]) OR (cardiovascular disease[All Fields] OR cardiovascular disease's[All Fields] OR cardiovascular disease,[All Fields] OR cardiovascular diseased[All Fields] OR cardiovascular diseases[All Fields])) AND (Clinical Trial[ptyp] AND ("2017/01/01"[PDAT] : "2019/03/01"[PDAT]) AND "humans"[MeSH Terms])</p> |
| <p>Search string for Mediterranean diet<br/>(Results = 153)</p> | <p>(mediterranean diet[All Fields] OR mediterranean dietary[All Fields] OR mediterranean diets[All Fields]) AND ((myocardial infarction[All Fields] OR myocardial infarction,[All Fields] OR myocardial infarctionl[All Fields] OR myocardial infarctions[All Fields]) OR (stroke[All Fields] OR stroke'[All Fields] OR stroke''[All Fields] OR stroke's[All Fields] OR stroke,[All Fields] OR stroke119[All Fields] OR stroke123[All Fields] OR stroke2[All Fields] OR stroke2000[All Fields] OR stroke2010[All Fields] OR stroke34[All Fields] OR stroke4carers[All Fields] OR stroke`s[All Fields] OR strokea[All Fields] OR strokeaetiology[All Fields] OR strokeaha[All Fields] OR strokeaha118020087[All Fields] OR strokeaha118020840[All Fields] OR strokeaha118021381[All Fields] OR strokeaha118021407[All Fields] OR strokeaha118021453[All Fields] OR strokeaha118021598[All Fields] OR strokeaha118021798[All Fields] OR strokeaha118022088[All Fields] OR strokeaha118022239[All Fields] OR strokeaha118022249[All Fields] OR strokeaha118022315[All Fields] OR strokeaha118022332[All Fields] OR strokeaha118022404[All Fields] OR strokeaha118022406[All Fields] OR strokeaha118022423[All Fields] OR strokeaha118022454[All Fields] OR strokeaha118022516[All Fields] OR strokeaha118022563[All Fields] OR strokeaha118022644[All Fields] OR strokeaha118022687[All Fields] OR strokeaha118022691[All Fields] OR strokeaha118022745[All Fields] OR strokeaha118022913[All Fields] OR strokeaha118022923[All Fields] OR strokeaha118023006[All Fields] OR strokeaha118023058[All Fields] OR strokeaha118023060[All Fields] OR strokeaha118023079[All Fields] OR strokeaha118023084[All Fields] OR strokeaha118023088[All Fields] OR strokeaha118023093[All Fields] OR strokeaha118023385[All Fields] OR strokeaha118023456[All Fields] OR</p>                                                                                                                                                                                                                           |

strokeaha118023457[All Fields] OR strokeaha118023465[All Fields] OR  
 strokeaha118023482[All Fields] OR strokeaha118023506[All Fields] OR  
 strokeaha118023527[All Fields] OR strokeaha118023573[All Fields] OR  
 strokeaha118023640[All Fields] OR strokeaha118023696[All Fields] OR  
 strokeaha118023701[All Fields] OR strokeaha118023702[All Fields] OR  
 strokeaha118023712[All Fields] OR strokeaha118023724[All Fields] OR  
 strokeaha118023744[All Fields] OR strokeaha118023749[All Fields] OR  
 strokeaha118023789[All Fields] OR strokeaha118023790[All Fields] OR  
 strokeaha118023830[All Fields] OR strokeaha118023850[All Fields] OR  
 strokeaha118023866[All Fields] OR strokeaha118023953[All Fields] OR  
 strokeaha118023955[All Fields] OR strokeaha118023990[All Fields] OR  
 strokeaha118024028[All Fields] OR strokeaha118024134[All Fields] OR  
 strokeaha118024232[All Fields] OR strokeaha118024442[All Fields] OR strokeand[All  
 Fields] OR strokecarecontents[All Fields] OR strokecenter[All Fields] OR strokecentre[All  
 Fields] OR strokechecklist[All Fields] OR strokeclose[All Fields] OR strokect[All Fields] OR  
 strokectacomputed[All Fields] OR strokectcomputed[All Fields] OR strokectomy[All  
 Fields] OR stroked[All Fields] OR strokedepartment[All Fields] OR strokedepressive[All  
 Fields] OR strokededge[All Fields] OR strokedidiagnostik[All Fields] OR strokedoc[All Fields]  
 OR strokedrabbade[All Fields] OR strokeearly[All Fields] OR strokeed[All Fields] OR  
 strokeelicited[All Fields] OR strokeenh[All Fields] OR strokeenheten[All Fields] OR  
 strokefall[All Fields] OR strokefobreybyggande[All Fields] OR strokefoundation[All Fields]  
 OR strokefree[All Fields] OR strokefrom[All Fields] OR strokehip[All Fields] OR strokein[All  
 Fields] OR strokeinduced[All Fields] OR strokeintracerebral[All Fields] OR strokelets[All  
 Fields] OR strokelike[All Fields] OR strokelink[All Fields] OR strokelocated[All Fields] OR  
 strokemerci[All Fields] OR strokemethods[All Fields] OR strokemobile[All Fields] OR  
 stroken[All Fields] OR strokenational[All Fields] OR strokenet[All Fields] OR  
 strokenengine[All Fields] OR strokenengine's[All Fields] OR strokenomics[All Fields] OR  
 strokenomics'[All Fields] OR strokepatienter[All Fields] OR strokepatients[All Fields] OR  
 strokepharmacogenomics[All Fields] OR strokeplane[All Fields] OR strokeprevention[All  
 Fields] OR strokeprophylax[All Fields] OR strokeprophylaxen[All Fields] OR strokeproject[All  
 Fields] OR strokeprone[All Fields] OR stroker[All Fields] OR strokerehab[All Fields] OR  
 strokerehabilitering[All Fields] OR strokerisk[All Fields] OR strokers[All Fields] OR  
 strokerwin[All Fields] OR strokes[All Fields] OR strokes'[All Fields] OR strokes1[All Fields]  
 OR strokesafe[All Fields] OR strokesand[All Fields] OR strokesektionen[All Fields] OR  
 strokesfuture[All Fields] OR strokesich[All Fields] OR strokeskydd[All Fields] OR  
 strokesmin[All Fields] OR strokestop[All Fields] OR strokestra[All Fields] OR  
 strokestudygz[All Fields] OR strokethree[All Fields] OR stroketool[All Fields] OR  
 stroketrials[All Fields] OR strokeun[All Fields] OR strokeunit[All Fields] OR strokevan[All  
 Fields] OR strokevard[All Fields] OR strokevarden[All Fields] OR strokevia[All Fields] OR  
 strokevision[All Fields] OR strokevolume[All Fields] OR strokevolumedon[All Fields] OR  
 strokevolumes[All Fields] OR strokewidth[All Fields] OR strokework[All Fields] OR  
 strokezero[All Fields]) OR (mortality[All Fields] OR mortality'[All Fields] OR mortality''[All  
 Fields] OR mortality's[All Fields] OR mortality,[All Fields] OR mortality1[All Fields] OR  
 mortality12[All Fields] OR mortality19[All Fields] OR mortality1965[All Fields] OR  
 mortality2[All Fields] OR mortalityabc[All Fields] OR mortalityagainst[All Fields] OR  
 mortalityall[All Fields] OR mortalityand[All Fields] OR mortalityat[All Fields] OR  
 mortalitydagger[All Fields] OR mortalityfor[All Fields] OR mortalityhf[All Fields] OR  
 mortalityin[All Fields] OR mortalityinterval[All Fields] OR mortalityinthe[All Fields] OR

|                                                                                       |                                                                                                                                                                                                                                                                                                                                                                                                                                                                                                                                                                                                                                                                                                                                                                                                                                                                                                                                                                                                                                                                                                                                                                                                                                                                                                                                                                                                                                                                                                                                                                                                                                                                                                                                                                                                                                                                                                                                                                                                                                                                                                                                                                                                                                                                                                                                                                                                                                                                                                                                                                                                                                                                                                                                                                                |
|---------------------------------------------------------------------------------------|--------------------------------------------------------------------------------------------------------------------------------------------------------------------------------------------------------------------------------------------------------------------------------------------------------------------------------------------------------------------------------------------------------------------------------------------------------------------------------------------------------------------------------------------------------------------------------------------------------------------------------------------------------------------------------------------------------------------------------------------------------------------------------------------------------------------------------------------------------------------------------------------------------------------------------------------------------------------------------------------------------------------------------------------------------------------------------------------------------------------------------------------------------------------------------------------------------------------------------------------------------------------------------------------------------------------------------------------------------------------------------------------------------------------------------------------------------------------------------------------------------------------------------------------------------------------------------------------------------------------------------------------------------------------------------------------------------------------------------------------------------------------------------------------------------------------------------------------------------------------------------------------------------------------------------------------------------------------------------------------------------------------------------------------------------------------------------------------------------------------------------------------------------------------------------------------------------------------------------------------------------------------------------------------------------------------------------------------------------------------------------------------------------------------------------------------------------------------------------------------------------------------------------------------------------------------------------------------------------------------------------------------------------------------------------------------------------------------------------------------------------------------------------|
|                                                                                       | <p>mortalitynrmmand[All Fields] OR mortalityof[All Fields] OR mortalityon[All Fields] OR mortalitypredictors[All Fields] OR mortalityrate[All Fields] OR mortalityrates[All Fields] OR mortalityrelated[All Fields] OR mortalityresearch[All Fields] OR mortalitysahsubarachnoid[All Fields] OR mortalitystudy[All Fields] OR mortalitysuggests[All Fields] OR mortalitythat[All Fields] OR mortalitythree[All Fields] OR mortalitytrm[All Fields] OR mortalitytrmin[All Fields] OR mortalitywas[All Fields] OR mortalitywith[All Fields] OR mortalityworldwide[All Fields] OR mortalityyyy[All Fields]) OR (cardiovascular disease[All Fields] OR cardiovascular disease's[All Fields] OR cardiovascular disease,[All Fields] OR cardiovascular diseased[All Fields] OR cardiovascular diseases[All Fields])) AND (Clinical Trial[ptyp] AND ("2014/01/01"[PDAT] : "2019/03/01"[PDAT]) AND "humans"[MeSH Terms])</p>                                                                                                                                                                                                                                                                                                                                                                                                                                                                                                                                                                                                                                                                                                                                                                                                                                                                                                                                                                                                                                                                                                                                                                                                                                                                                                                                                                                                                                                                                                                                                                                                                                                                                                                                                                                                                                                           |
| <p>Search string for reduced salt (normotensives or hypertensives) (Results = 88)</p> | <p>(dietary salt[All Fields] OR dietary salts[All Fields]) AND ((myocardial infarction[All Fields] OR myocardial infarction,[All Fields] OR myocardial infarctionl[All Fields] OR myocardial infarctions[All Fields]) OR (stroke[All Fields] OR stroke'[All Fields] OR stroke"[All Fields] OR stroke's[All Fields] OR stroke,[All Fields] OR stroke19[All Fields] OR stroke123[All Fields] OR stroke2[All Fields] OR stroke2000[All Fields] OR stroke2010[All Fields] OR stroke34[All Fields] OR stroke4carers[All Fields] OR stroke`s[All Fields] OR strokea[All Fields] OR strokeaetiology[All Fields] OR strokeaha[All Fields] OR strokeaha118020087[All Fields] OR strokeaha118020840[All Fields] OR strokeaha118021381[All Fields] OR strokeaha118021407[All Fields] OR strokeaha118021453[All Fields] OR strokeaha118021598[All Fields] OR strokeaha118021798[All Fields] OR strokeaha118022088[All Fields] OR strokeaha118022239[All Fields] OR strokeaha118022249[All Fields] OR strokeaha118022315[All Fields] OR strokeaha118022332[All Fields] OR strokeaha118022404[All Fields] OR strokeaha118022406[All Fields] OR strokeaha118022423[All Fields] OR strokeaha118022454[All Fields] OR strokeaha118022516[All Fields] OR strokeaha118022563[All Fields] OR strokeaha118022644[All Fields] OR strokeaha118022687[All Fields] OR strokeaha118022691[All Fields] OR strokeaha118022745[All Fields] OR strokeaha118022913[All Fields] OR strokeaha118022923[All Fields] OR strokeaha118023006[All Fields] OR strokeaha118023058[All Fields] OR strokeaha118023060[All Fields] OR strokeaha118023079[All Fields] OR strokeaha118023084[All Fields] OR strokeaha118023088[All Fields] OR strokeaha118023093[All Fields] OR strokeaha118023385[All Fields] OR strokeaha118023456[All Fields] OR strokeaha118023457[All Fields] OR strokeaha118023465[All Fields] OR strokeaha118023482[All Fields] OR strokeaha118023506[All Fields] OR strokeaha118023527[All Fields] OR strokeaha118023573[All Fields] OR strokeaha118023640[All Fields] OR strokeaha118023696[All Fields] OR strokeaha118023701[All Fields] OR strokeaha118023702[All Fields] OR strokeaha118023712[All Fields] OR strokeaha118023724[All Fields] OR strokeaha118023744[All Fields] OR strokeaha118023749[All Fields] OR strokeaha118023789[All Fields] OR strokeaha118023790[All Fields] OR strokeaha118023830[All Fields] OR strokeaha118023850[All Fields] OR strokeaha118023866[All Fields] OR strokeaha118023953[All Fields] OR strokeaha118023955[All Fields] OR strokeaha118023990[All Fields] OR strokeaha118024028[All Fields] OR strokeaha118024134[All Fields] OR strokeaha118024232[All Fields] OR strokeaha118024442[All Fields] OR strokeand[All Fields] OR strokecarecontents[All</p> |

Fields] OR strokecenter[All Fields] OR strokecentre[All Fields] OR strokechecklist[All Fields] OR strokeclose[All Fields] OR strokect[All Fields] OR strokectacomputed[All Fields] OR strokectcomputed[All Fields] OR strokectomy[All Fields] OR stroked[All Fields] OR strokeddepartment[All Fields] OR strokedepressive[All Fields] OR strokededge[All Fields] OR strokeddiagnostik[All Fields] OR strokedoc[All Fields] OR strokedrabbade[All Fields] OR strokeearly[All Fields] OR strokeed[All Fields] OR strokeelicited[All Fields] OR strokeenh[All Fields] OR strokeenheten[All Fields] OR strokefall[All Fields] OR strokefobrebyggande[All Fields] OR strokefoundation[All Fields] OR strokefree[All Fields] OR strokefrom[All Fields] OR strokehip[All Fields] OR strokein[All Fields] OR strokeinduced[All Fields] OR strokeintracerebral[All Fields] OR strokelets[All Fields] OR strokelike[All Fields] OR strokelink[All Fields] OR strokelocated[All Fields] OR strokemerci[All Fields] OR strokemethods[All Fields] OR strokemobile[All Fields] OR stroken[All Fields] OR strokenational[All Fields] OR strokenet[All Fields] OR strokengine[All Fields] OR strokengine's[All Fields] OR strokenomics[All Fields] OR strokenomics'[All Fields] OR strokepatienter[All Fields] OR strokepatients[All Fields] OR strokepharmacogenomics[All Fields] OR strokeplane[All Fields] OR strokeprevention[All Fields] OR strokeprofylax[All Fields] OR strokeprofylaxen[All Fields] OR strokeproject[All Fields] OR strokeprone[All Fields] OR stroker[All Fields] OR strokerehab[All Fields] OR strokerehabilitering[All Fields] OR strokerisk[All Fields] OR strokers[All Fields] OR strokerwin[All Fields] OR strokes[All Fields] OR strokes'[All Fields] OR strokes1[All Fields] OR strokesafe[All Fields] OR strokesand[All Fields] OR strokesektionen[All Fields] OR strokesfuture[All Fields] OR strokesich[All Fields] OR strokeskydd[All Fields] OR strokesmin[All Fields] OR strokestop[All Fields] OR strokestra[All Fields] OR strokestudygz[All Fields] OR strokethree[All Fields] OR stroketool[All Fields] OR stroketrials[All Fields] OR strokeun[All Fields] OR strokeunit[All Fields] OR strokevan[All Fields] OR strokevard[All Fields] OR strokevarden[All Fields] OR strokevia[All Fields] OR strokevision[All Fields] OR strokevolume[All Fields] OR strokevolumedon[All Fields] OR strokevolumes[All Fields] OR strokewidth[All Fields] OR strokework[All Fields] OR strokezero[All Fields]) OR (mortality[All Fields] OR mortality'[All Fields] OR mortality''[All Fields] OR mortality's[All Fields] OR mortality,[All Fields] OR mortality1[All Fields] OR mortality12[All Fields] OR mortality19[All Fields] OR mortality1965[All Fields] OR mortality2[All Fields] OR mortalityabc[All Fields] OR mortalityagainst[All Fields] OR mortalityall[All Fields] OR mortalityand[All Fields] OR mortalityat[All Fields] OR mortalitydagger[All Fields] OR mortalityfor[All Fields] OR mortalityhf[All Fields] OR mortalityin[All Fields] OR mortalityinterval[All Fields] OR mortalityinthe[All Fields] OR mortalitynrmand[All Fields] OR mortalityof[All Fields] OR mortalityon[All Fields] OR mortalitypredictors[All Fields] OR mortalityrate[All Fields] OR mortalityrates[All Fields] OR mortalityrelated[All Fields] OR mortalityresearch[All Fields] OR mortalitysahsubarachnoid[All Fields] OR mortalitystudy[All Fields] OR mortalitysuggests[All Fields] OR mortalitythat[All Fields] OR mortalitythree[All Fields] OR mortalitytrm[All Fields] OR mortalitytrmin[All Fields] OR mortalitywas[All Fields] OR mortalitywith[All Fields] OR mortalityworldwide[All Fields] OR mortalityyyy[All Fields]) OR (cardiovascular disease[All Fields] OR cardiovascular disease's[All Fields] OR cardiovascular disease,[All Fields] OR cardiovascular diseased[All Fields] OR cardiovascular diseases[All Fields])) AND (Clinical Trial[ptyp] AND ("2014/01/01"[PDAT] : "2019/03/01"[PDAT]) AND "humans"[MeSH Terms])

Search string for reduced dietary fat, modified dietary fat or reduced saturated fat  
(Results = 10)

((reduced fat[All Fields] OR reduced fatalities[All Fields] OR reduced fatality[All Fields] OR reduced fatigability[All Fields] OR reduced fatiguability[All Fields] OR reduced fatigue[All Fields] OR reduced fatness[All Fields]) OR (modified fat[All Fields] OR modified fats[All Fields])) AND ((myocardial infarction[All Fields] OR myocardial infarction,[All Fields] OR myocardial infarctionl[All Fields] OR myocardial infarctions[All Fields]) OR (stroke[All Fields] OR stroke'[All Fields] OR stroke"[All Fields] OR stroke's[All Fields] OR stroke,[All Fields] OR stroke119[All Fields] OR stroke123[All Fields] OR stroke2[All Fields] OR stroke2000[All Fields] OR stroke2010[All Fields] OR stroke34[All Fields] OR stroke4carers[All Fields] OR stroke`s[All Fields] OR strokea[All Fields] OR strokeaetiology[All Fields] OR strokeaha[All Fields] OR strokeaha118020087[All Fields] OR strokeaha118020840[All Fields] OR strokeaha118021381[All Fields] OR strokeaha118021407[All Fields] OR strokeaha118021453[All Fields] OR strokeaha118021598[All Fields] OR strokeaha118021798[All Fields] OR strokeaha118022088[All Fields] OR strokeaha118022239[All Fields] OR strokeaha118022249[All Fields] OR strokeaha118022315[All Fields] OR strokeaha118022332[All Fields] OR strokeaha118022404[All Fields] OR strokeaha118022406[All Fields] OR strokeaha118022423[All Fields] OR strokeaha118022454[All Fields] OR strokeaha118022516[All Fields] OR strokeaha118022563[All Fields] OR strokeaha118022644[All Fields] OR strokeaha118022687[All Fields] OR strokeaha118022691[All Fields] OR strokeaha118022745[All Fields] OR strokeaha118022913[All Fields] OR strokeaha118022923[All Fields] OR strokeaha118023006[All Fields] OR strokeaha118023058[All Fields] OR strokeaha118023060[All Fields] OR strokeaha118023079[All Fields] OR strokeaha118023084[All Fields] OR strokeaha118023088[All Fields] OR strokeaha118023093[All Fields] OR strokeaha118023385[All Fields] OR strokeaha118023456[All Fields] OR strokeaha118023457[All Fields] OR strokeaha118023465[All Fields] OR strokeaha118023482[All Fields] OR strokeaha118023506[All Fields] OR strokeaha118023527[All Fields] OR strokeaha118023573[All Fields] OR strokeaha118023640[All Fields] OR strokeaha118023696[All Fields] OR strokeaha118023701[All Fields] OR strokeaha118023702[All Fields] OR strokeaha118023712[All Fields] OR strokeaha118023724[All Fields] OR strokeaha118023744[All Fields] OR strokeaha118023749[All Fields] OR strokeaha118023789[All Fields] OR strokeaha118023790[All Fields] OR strokeaha118023830[All Fields] OR strokeaha118023850[All Fields] OR strokeaha118023866[All Fields] OR strokeaha118023953[All Fields] OR strokeaha118023955[All Fields] OR strokeaha118023990[All Fields] OR strokeaha118024028[All Fields] OR strokeaha118024134[All Fields] OR strokeaha118024232[All Fields] OR strokeaha118024442[All Fields] OR strokeand[All Fields] OR strokecarecontents[All Fields] OR strokecenter[All Fields] OR strokecentre[All Fields] OR strokechecklist[All Fields] OR strokeclose[All Fields] OR strokect[All Fields] OR strokectacomputed[All Fields] OR strokectcomputed[All Fields] OR strokectomy[All Fields] OR stroked[All Fields] OR strokedepartment[All Fields] OR strokedepressive[All Fields] OR strokededge[All Fields] OR strokediagnostics[All Fields] OR strokedoc[All Fields] OR strokedrabbade[All Fields] OR strokeearly[All Fields] OR strokeed[All Fields] OR strokeelicited[All Fields] OR strokeenh[All Fields] OR strokeenheten[All Fields] OR strokefall[All Fields] OR strokefobrebyggande[All Fields] OR strokefoundation[All Fields] OR strokefree[All Fields] OR strokefrom[All Fields] OR strokehip[All Fields] OR strokein[All Fields]

Fields] OR strokeinduced[All Fields] OR strokeintracerebral[All Fields] OR strokelets[All Fields] OR strokelike[All Fields] OR strokelink[All Fields] OR strokelocated[All Fields] OR strokemerci[All Fields] OR strokemethods[All Fields] OR strokemobile[All Fields] OR stroken[All Fields] OR strokenational[All Fields] OR strokenet[All Fields] OR strokenengine[All Fields] OR strokenengine's[All Fields] OR strokenomics[All Fields] OR strokenomics'[All Fields] OR strokepatienter[All Fields] OR strokepatients[All Fields] OR strokepharmacogenomics[All Fields] OR strokeplane[All Fields] OR strokeprevention[All Fields] OR strokeproflyax[All Fields] OR strokeproflyaxen[All Fields] OR strokeproject[All Fields] OR strokeprone[All Fields] OR stroker[All Fields] OR strokerehab[All Fields] OR strokerehabilitating[All Fields] OR strokerisk[All Fields] OR strokers[All Fields] OR strokerwin[All Fields] OR strokes[All Fields] OR strokes'[All Fields] OR strokes1[All Fields] OR strokesafe[All Fields] OR strokesand[All Fields] OR strokesektionen[All Fields] OR strokesfuture[All Fields] OR strokesich[All Fields] OR strokeskydd[All Fields] OR strokesmin[All Fields] OR strokestop[All Fields] OR strokestra[All Fields] OR strokestudygz[All Fields] OR strokethree[All Fields] OR stroketool[All Fields] OR stroketrials[All Fields] OR strokeun[All Fields] OR strokeunit[All Fields] OR strokevan[All Fields] OR strokevard[All Fields] OR strokevarden[All Fields] OR strokevia[All Fields] OR strokevision[All Fields] OR strokevolume[All Fields] OR strokevolumedon[All Fields] OR strokevolumes[All Fields] OR strokewidth[All Fields] OR strokework[All Fields] OR strokezero[All Fields]) OR (mortality[All Fields] OR mortality'[All Fields] OR mortality''[All Fields] OR mortality's[All Fields] OR mortality,[All Fields] OR mortality1[All Fields] OR mortality12[All Fields] OR mortality19[All Fields] OR mortality1965[All Fields] OR mortality2[All Fields] OR mortalityabc[All Fields] OR mortalityagainst[All Fields] OR mortalityall[All Fields] OR mortalityand[All Fields] OR mortalityat[All Fields] OR mortalitydagger[All Fields] OR mortalityfor[All Fields] OR mortalityhf[All Fields] OR mortalityin[All Fields] OR mortalityinterval[All Fields] OR mortalityinthe[All Fields] OR mortalitynrmand[All Fields] OR mortalityof[All Fields] OR mortalityon[All Fields] OR mortalitypredictors[All Fields] OR mortalityrate[All Fields] OR mortalityrates[All Fields] OR mortalityrelated[All Fields] OR mortalityresearch[All Fields] OR mortalitysahsubarachnoid[All Fields] OR mortalitystudy[All Fields] OR mortalitysuggests[All Fields] OR mortalitythat[All Fields] OR mortalitythree[All Fields] OR mortalitytrm[All Fields] OR mortalitytrmin[All Fields] OR mortalitywas[All Fields] OR mortalitywith[All Fields] OR mortalityworldwide[All Fields] OR mortalityyyy[All Fields]) OR (cardiovascular disease[All Fields] OR cardiovascular disease's[All Fields] OR cardiovascular disease,[All Fields] OR cardiovascular diseased[All Fields] OR cardiovascular diseases[All Fields])) AND (Clinical Trial[ptyp] AND ("2014/01/01"[PDAT] : "2019/03/01"[PDAT]) AND "humans"[MeSH Terms]

**Supplement Table 2. Ongoing Relevant Randomized Controlled Trials Identified Using ClinicalTrials.gov**

| <b>Nutritional supplements</b> |                                                                                                                                                                            |                                                                                         |                        |
|--------------------------------|----------------------------------------------------------------------------------------------------------------------------------------------------------------------------|-----------------------------------------------------------------------------------------|------------------------|
| <b>Intervention</b>            | <b>Title [NCT number]</b>                                                                                                                                                  | <b>Condition</b>                                                                        | <b>Completion date</b> |
| Vitamin K                      | Effect of Vitamin K2 (MK7) on cardiovascular and Bone Disease in Dialysis Patients [NCT02976246]                                                                           | Vitamin K Supplementation; EndStage Renal Disease; Cardiovascular Disease; Bone Disease | August 2020            |
| Antioxidant                    | Combined Antioxidant Therapy on Oxidative Stress, Mitochondrial Dysfunction Markers in Diabetic Retinopathy [NCT03702374]                                                  | Diabetic Retinopathy                                                                    | November 2020          |
| Sodium Selenite                | Sodium Selenite Administration in Cardiac Surgery (SUSTAIN CSX®-Trial) [NCT02002247]                                                                                       | Heart Disease                                                                           | June 2020              |
| Vitamin E                      | Vitamin E and N-acetylcysteine for Preventing Contrast-Induced Acute Kidney Injury After Coronary Artery Catheterization [NCT03755700]                                     | Coronary Artery Disease; Coronary Artery Angiography; Coronary Catheterization          | December 2019          |
| Multivitamins                  | Cocoa supplement and outcome study [NCT02422745]                                                                                                                           | Cardiovascular Disease; Cancer                                                          | October 2020           |
|                                | The Effect of Multivitamin Supplement in Adult Females [NCT03828097]                                                                                                       | Healthy                                                                                 | June 2019              |
|                                | Trial to Assess Chelation Therapy 2 [NCT02733185]                                                                                                                          | Diabetes; Myocardial Infarction                                                         | December 2021          |
| Selenium                       | Selenium Treatment and Chagasic Cardiopathy (STCC) [NCT00875173]                                                                                                           | Chagas Disease                                                                          | December 2020          |
| Tocotrienol                    | Stroke and Tocotrienol : Unique Role in Neuroprotection [NCT02263924]                                                                                                      | Ischemic Stroke                                                                         | December 2018          |
| Tocotrienols                   | Safety and Efficacy of Tocotrienols in Post-CABG Atrial Fibrillation [NCT03807037]                                                                                         | Atrial Fibrillation                                                                     | January 30, 2020       |
| Menaquinone-7 (Vitamin K2)     | The effect of Vitamin K2 supplementation on the progression of coronary artery calcification [NCT01002157]                                                                 | Coronary Artery Disease                                                                 | October 2019           |
| Menaquinone-7                  | A Randomized, Placebo-Controlled, Double Blind Trial to Investigate Whether Vitamin K2 can Influence Arterial Calcification in Patients with Type 2 Diabetes [NCT02839044] | Arterial Calcification<br>Diabetes Mellitus Type 2                                      | December 2018          |
| Vitamin D                      | Vitamin D, Cardiovascular Disease, and African Americans [NCT01655810]                                                                                                     | Vitamin D Deficiency; Type 2 Diabetes Mellitus; Cardiovascular Disease                  | December 2018          |
|                                | Effect of Vitamin D3 Supplementation on Cardiometabolic Risk [NCT02359214]                                                                                                 | Cardiovascular Disease; Diabetes ; Bone Disease                                         | December 2017          |

|                                                     |                                                                                                                                      |                                                                                       |                |
|-----------------------------------------------------|--------------------------------------------------------------------------------------------------------------------------------------|---------------------------------------------------------------------------------------|----------------|
|                                                     | Vitamin D and Omega-3 Trial (VITAL) [NCT01169259]                                                                                    | Cancer ; Cardiovascular Disease                                                       | November 2020  |
|                                                     | Vitamin D, Insulin Resistance, and Cardiovascular Disease [NCT00736632]                                                              | Vitamin D Deficiency; Insulin Resistance; Type 2 Diabetes Mellitus                    | December 2018  |
| Vitamin D + fish oil/fish oil placebo               | Impact of Vitamin D Supplementation on Cardiac Structure and Function [NCT01630213]                                                  | Cardiovascular Disease                                                                | December 2020  |
| Vitamin D and fish oil                              | Intervention With Vitamin D and Omega-3 Supplements and Incident Heart Failure [NCT02271230]                                         | Heart Failure                                                                         | June 2019      |
| n-3 LC PUFA                                         | Outcome Study of Assess STatin Residual Risk Reduction With EpaNova in HiGh CV Risk PatientS With Hypertriglyceridemia [NCT02104817] | Eligible Men or Women Considered High Risk for Atherosclerotic Cardiovascular Disease | October 2019   |
|                                                     | ASCEND : A Study of Cardiovascular events in Diabetes                                                                                | Diabetes Mellitus                                                                     | July 2037      |
| <b>Dietary interventions</b>                        |                                                                                                                                      |                                                                                       |                |
| Blueberry Powder                                    | Blueberries for Improving Vascular Endothelial Function in Postmenopausal Women With Elevated Blood Pressure [NCT03370991]           | Menopause; Hypertension; Endothelial dysfunction                                      | December 2019  |
| Mediterranean diet                                  | CORonary Diet Intervention With Olive Oil and Cardiovascular PREvention (CORDIOPREV) [NCT00924937]                                   | Myocardial Infarction; Unstable Angina; Malignancy; Cognitive impairment              | September 2019 |
|                                                     | The Mediterranean Full-Fat Dairy Study [NCT02781675]                                                                                 | Cardiovascular disease; Dyslipidemia; Inflammation                                    | December 2018  |
| Modified Citrus Pectin                              | Galactein-3 Blockade in Patients With High Blood Pressure [NCT01960946]                                                              | Hypertension                                                                          | October 2020   |
| Salt                                                | SODIUM HF : Study of Dietary Intervention Under 100 MMOL in Heart Failure [NCT02012179]                                              | Heart Failure                                                                         | December 2023  |
| Plant-Based Diet                                    | Plant-Based, American Heart Assoc. Or Mediterranean Diets n 9-18 yo With BMI >95%, Cholesterol >169 and Their Parents [NCT02857543]  | Obesity; Hypercholesterolemia; Cardiovascular disease                                 | December 2019  |
| Almonds                                             | The Impact of Almond Nut Consumption on Markers of CVD & Metabolic Health [NCT02907684]                                              | Cardiovascular disease                                                                | April 30, 2019 |
| Vegetarian Diet followed by meat Diet or vice versa | Vegetarian Diet in Patients With Ischemic Heart Disease [NCT02942628]                                                                | Ischemic Heart Disease                                                                | March 2019     |



|                                                                                                                                                                                                                                                                                                                                                                                                             |                                                                                                                 |                                     |                  |
|-------------------------------------------------------------------------------------------------------------------------------------------------------------------------------------------------------------------------------------------------------------------------------------------------------------------------------------------------------------------------------------------------------------|-----------------------------------------------------------------------------------------------------------------|-------------------------------------|------------------|
| Dietary Supplement :<br>grape seed extract                                                                                                                                                                                                                                                                                                                                                                  | The Effect of Grape Seed Extract on Blood Pressure in People With Pre-Hypertension [NCT00979732]                | Hypertension                        | October 15, 2019 |
| R-Alpha Lipoic Acid                                                                                                                                                                                                                                                                                                                                                                                         | The Role of R-Alpha Lipoic Acid in the Treatment of Atherosclerotic Vascular Disease [NCT00764270]              | Atherosclerosis                     | December 2018    |
|                                                                                                                                                                                                                                                                                                                                                                                                             | Lipoic Acid and Prevention of Heart Disease [NCT00765310]                                                       | Atherosclerosis                     | December 2018    |
| L-carnitine capsules                                                                                                                                                                                                                                                                                                                                                                                        | Carnitine for the Treatment of Atherosclerosis [NCT02117661]                                                    | Metabolic Syndrome                  | May 2019         |
| Salmon-Polar Lipids                                                                                                                                                                                                                                                                                                                                                                                         | In Vitro And Ex Vivi Anti-Inflammatory Activities of Salmon Polar Lipids [NCT03603769]                          | Cardiovascular Disease              | November 2018    |
| Whole Eggs                                                                                                                                                                                                                                                                                                                                                                                                  | Cardioprotective Activities of Whole Egges on Vascular Endothelial Function in Prediabetic Adults [NCT02364570] | Prediabetes; Cardiovascular Disease | December 2017    |
| Search terms used : Multivitamins; minerals; Diet; Antioxidants; $\beta$ -carotene; vitamin B-complex; multivitamins; selenium; vitamin A; vitamin B3/Niacin; vitamin B6; vitamin C; vitamin E; vitamin D; calcium + vitamin D; calcium; folic acid; iron; Omega 3 Fatty Acid; Omega 6 Fatty Acid; Salt; Fat. Eligibility Criteria : [Adult (18-64)] and [old adult (65+)] and study type; [interventional] |                                                                                                                 |                                     |                  |

**Supplement Table 3. Randomized Controlled Trials Included in Analyses**

| <b>Study (reference)</b>           | <b>Supplement exposure</b>                                               | <b>Participants</b> |
|------------------------------------|--------------------------------------------------------------------------|---------------------|
| Brohult et al., 1973 (10)          | Vitamin D                                                                | 50                  |
| CDPRG 1975(11)                     | Vitamin B3                                                               | 3908                |
| Gillilan et al., 1977 (12)         | Vitamin E                                                                | 52                  |
| Inkovaara et al., 1983(13)         | Vitamin D                                                                | 87                  |
|                                    | Calcium + Vitamin D                                                      | 88                  |
| Corless et al., 1985 (14)          | Vitamin D <sub>2</sub>                                                   | 82                  |
| Aloia et al., 1988(15)             | Vitamin D                                                                | 27                  |
| Korpela et al., 1989(16)           | Selenium                                                                 | 81                  |
| McKeown-Eyssen et al., 1988 (17)   | vitamins C and E                                                         | 185                 |
| Ott et al., 1989(18)               | Vitamin D                                                                | 86                  |
| Gallagher et al., 1990 (19)        | Vitamin D                                                                | 50                  |
| Grady et al., 1991 (20)            | Vitamin D <sub>3</sub>                                                   | 98                  |
| Chapuy et al., 1992 (21)           | Calcium + Vitamin D <sub>3</sub>                                         | 3270                |
| Li et al., 1993 – NIT2(22)         | Multivitamins                                                            | 3318                |
| Bogden et al., 1994 (23)           | Multivitamins                                                            | 65                  |
| de la Maza et al., 1995 (24)       | Vitamin E                                                                | 74                  |
| Hamdy et al., 1995 (25)            | Vitamin D                                                                | 176                 |
| Ooms et al., 1995 (26)             | Vitamin D <sub>3</sub>                                                   | 348                 |
| Pike et al., 1995 (27)             | Multivitamins                                                            | 47                  |
| Steiner et al., 1995 (28)          | α- tocopherol                                                            | 100                 |
| Greenberg et al., 1996 – SCPS (29) | β-carotene                                                               | 1805                |
| Hennekens et al., 1996-PHS (30)    | β-carotene                                                               | 22071               |
| Lips et al., 1996 (31)             | Vitamin D <sub>3</sub>                                                   | 2578                |
| Omenn et al., 1996 – CARET (32)    | β-carotene                                                               | 18314               |
| Stephens et al., 1996 – CHAOS (33) | Vitamin E                                                                | 2002                |
| Dawson-Hughes et al., 1997 (34)    | Calcium + Vitamin D <sub>3</sub>                                         | 389                 |
| Girodon et al., 1997 (35)          | Antioxidants: zinc sulfate, selenite, Vitamin C, β-carotene α-tocopherol | 41                  |
| Moon et al., 1997 – SKICAP AK (36) | Retinol                                                                  | 2297                |
| Sano et al., 1997 – ADCS 1 (37)    | Vitamin E                                                                | 169                 |

|                                             |                                                                                   |       |
|---------------------------------------------|-----------------------------------------------------------------------------------|-------|
| Sato et al., 1997 (38)                      | Vitamin D                                                                         | 84    |
| Baeksgaard et al., 1998 (39)                | Calcium + Vitamin D                                                               | 160   |
| Shoulson et al., 1998 – DATATOP (40)        | Vitamin E                                                                         | 800   |
| Virtamo et al., 1998 – ATBC (41)            | Vitamin E                                                                         | 13669 |
| Baron et al., 1999 – CPPS (42)              | Calcium                                                                           | 930   |
| Hoffman et al., 1999 (43)                   | Vitamin E                                                                         | 39    |
| Girodon et al., 1999 – MIN.VIT.AOX (44)     | Antioxidants: Zinc, Selenium, Vitamin C, $\beta$ -carotene, $\alpha$ -tocopherol) | 363   |
| GISSI – Prevenzione Investigators 1999 (45) | Vitamin E and n-3 LC PUFA                                                         | 11324 |
| Green et al., 1999 – NSCPT (46)             | $\beta$ -carotene                                                                 | 1621  |
| Komulainen et al., 1999 – OSTPRE (47)       | Vitamin D                                                                         | 227   |
|                                             | Calcium + Vitamin D                                                               | 231   |
|                                             | Calcium + Vitamin D                                                               | 248   |
| Krieg et al., 1999 (48)                     | Calcium + Vitamin D                                                               | 248   |
| Sato et al., 1999 (49)                      | Vitamin D                                                                         | 86    |
| Boaz et al., 2000 – SPACE (50)              | Vitamin E                                                                         | 196   |
| Correa et al., 2000 (51)                    | Vitamin C                                                                         | 247   |
|                                             | $\beta$ -carotene                                                                 | 234   |
|                                             | Antioxidants: Vitamin C and $\beta$ -carotene                                     | 238   |
| Frazao et al., 2000 (52)                    | Vitamin D                                                                         | 138   |
| Lee et al., 1999 – WHS (53)                 | $\beta$ -carotene                                                                 | 39876 |
| Leppälä et al., 2000 – ATBC (54)            | Antioxidants: Vitamin E, $\beta$ -carotene                                        | 14271 |
|                                             | $\beta$ -carotene                                                                 | 28519 |
| Jacobson et al., 2000 (55)                  | Antioxidants: vitamin C, $\alpha$ -tocopherol, $\beta$ -carotene                  | 112   |
| Salonen et al., 2000 – ASAP (56)            | Vitamin E                                                                         | 260   |
|                                             | Vitamin C                                                                         | 260   |
| AREDS Research Group 2001 (57)              | Antioxidants: Vitamin C, Vitamin E, $\beta$ -carotene, zinc                       | 4629  |
| Brown et al., 2001 – HATS (58)              | Antioxidants: Vitamin E + Vitamin C + $\beta$ -carotene + selenium                | 80    |
| de Gaetano et al., 2001 – PPP (59)          | $\alpha$ -tocopherol                                                              | 4495  |
| Desnuelle et al., 2001 – ALSRT (60)         | $\alpha$ -tocopherol                                                              | 288   |
| de Waart et al., 2001 (61)                  | Vitamin E                                                                         | 218   |
| Gallagher et al., 2001 – STOP IT (62)       | Vitamin D                                                                         | 246   |
| You et al., 2001 – SIT (63)                 | Antioxidants: Vitamin C + Vitamin E + $\beta$ -carotene + selenium                | 3411  |
| Baker et al., 2002 (64)                     | Folic acid                                                                        | 1882  |
| Chapuy et al., 2002 – Decalys II (65)       | Calcium + Vitamin D <sub>3</sub>                                                  | 583   |

|                                                    |                                                                                   |       |
|----------------------------------------------------|-----------------------------------------------------------------------------------|-------|
| Chylack et al., 2002 – REACT (66)                  | Antioxidants: $\beta$ -carotene, vitamin C, vitamin E                             | 297   |
| Graat et al., 2002 (67)                            | Vitamin E                                                                         | 317   |
|                                                    | Multivitamin                                                                      | 316   |
| Hodis et al., 2002 – VEAPS (68)                    | Vitamin E                                                                         | 353   |
| HPS Collaborative Group 2002 (69)                  | Antioxidants: Vitamin E + Vitamin C + $\beta$ -carotene                           | 20536 |
| Meyer et al., 2002 (70)                            | Vitamin D                                                                         | 1144  |
| Schnyder et al., 2002 – The Swiss Heart Study (71) | Vitamin B-complex (folic acid, vitamin B <sub>12</sub> , vitamin B <sub>6</sub> ) | 553   |
| Waters et al., 2002 – WAVE (72)                    | Antioxidants: vitamin E + Vitamin C                                               | 213   |
| Wluka et al., 2002 (73)                            | Vitamin E                                                                         | 136   |
| Collins et al., 2003 (74)                          | Vitamin E                                                                         | 52    |
| Cooper et al., 2003 (75)                           | Vitamin D                                                                         | 187   |
| Liem et al., 2003 (76)                             | Folic acid                                                                        | 593   |
| Righetti et al., 2003 (77)                         | Folic acid                                                                        | 81    |
| Trivedi et al., 2003 (78)                          | Vitamin D                                                                         | 2686  |
| Virtamo et al., 2003 – ATBC (79)                   | $\beta$ -carotene                                                                 | 14569 |
|                                                    | Vitamin E                                                                         | 14573 |
| Dukas et al., 2004 (80)                            | Vitamin D                                                                         | 378   |
| Harwood et al., 2004 – NoNOF (81)                  | Vitamin D                                                                         | 75    |
|                                                    | Calcium + Vitamin D <sub>3</sub>                                                  | 76    |
| Coburn et al., 2004 (82)                           | Vitamin D                                                                         | 55    |
| Lange et al., 2004 (83)                            | Vitamin B-complex (folic acid, vitamin B <sub>12</sub> , vitamin B <sub>6</sub> ) | 636   |
| Larsen et al., 2004 (84)                           | Calcium + Vitamin D <sub>3</sub>                                                  | 9605  |
| Liem et al., 2004 (85)                             | Folic acid                                                                        | 283   |
| Taylor et al., 2004 – ARBITER 2 (86)               | Vitamin B3 (niacin)                                                               | 167   |
| Tornwall et al., 2004 – ATBC (87)                  | Antioxidants: $\alpha$ -tocopherol, $\beta$ -carotene                             | 13630 |
|                                                    | $\beta$ -carotene                                                                 | 13670 |
| Manuel-Y-Keenoy et al., 2004 – DATOR (88)          | $\alpha$ -tocopherol                                                              | 24    |
| McNeil et al., 2004 – VECAT (89)                   | Vitamin E                                                                         | 1193  |
| Meier et al., 2004 (90)                            | Calcium + Vitamin D <sub>3</sub>                                                  | 55    |
| Meydani et al., 2004 (91)                          | Vitamin                                                                           | 617   |
| Aloia et al., 2005 (92)                            | Vitamin D <sub>3</sub>                                                            | 208   |

|                                             |                                                                                   |       |
|---------------------------------------------|-----------------------------------------------------------------------------------|-------|
| Avenell et al., 2005 – MAVIS (93)           | Multivitamin                                                                      | 910   |
| Brazier et al., 2005 (94)                   | Calcium + Vitamin D <sub>3</sub>                                                  | 192   |
| Flicker et al., 2005 (95)                   | Vitamin D                                                                         | 625   |
| Graf et al., 2005 (96)                      | Vitamin E                                                                         | 160   |
| Grant et al., 2005 – RECORD (97)            | Calcium + Vitamin D <sub>3</sub>                                                  | 2638  |
|                                             | Calcium only                                                                      | 2241  |
|                                             | Vitamin D only                                                                    | 5292  |
| Lee et al., 2005 –WHS (98)                  | Vitamin E                                                                         | 39876 |
| Limburg et al., 2005 (99)                   | Selenomethionine                                                                  | 180   |
| Lonn et al., 2005 – HOPE and HOPE-TOO (100) | Vitamin E                                                                         | 9541  |
| Mooney et al., 2005 (101)                   | Vitamin C and E                                                                   | 284   |
| Petersen et al, 2005 – ADCS 2 (102)         | Vitamin E                                                                         | 516   |
| Porthouse et al., 2005 (103)                | Calcium+Vitamin D                                                                 | 3314  |
| Potena et al., 2005 (104)                   | Folic acid                                                                        | 51    |
| Sato et al., 2005 (105)                     | Vitamin D                                                                         | 96    |
| Bairati et al., 2006 (106)                  | α –tocopherol                                                                     | 384   |
| Bonaa et al., 2006 – NORVIT (107)           | Vitamin B6                                                                        | 1877  |
|                                             | B-complex                                                                         | 1880  |
| Coyne et al., 2006 (108)                    | Vitamin D                                                                         | 220   |
| Daly et al., 2006 (109)                     | Calcium+Vitamin D                                                                 | 167   |
| Law et al., 2006 (110)                      | Vitamin D                                                                         | 3717  |
| Lonn et al., 2006 – HOPE-TOO (111)          | Vitamin B-complex (folic acid, vitamin B <sub>6</sub> , vitamin B <sub>12</sub> ) | 5522  |
| Magliano et al., 2006 – MAVET (112)         | Vitamin E                                                                         | 409   |
| Schleithoff et al., 2006 (113)              | Calcium + Vitamin D <sub>3</sub>                                                  | 123   |
| Stranges et al., 2006 – NPC (114)           | Selenium                                                                          | 1004  |
| Zoungas et al., 2006 – ASFAST (115)         | Folic acid                                                                        | 315   |
| Bolton-Smith et al., 2007 (116)             | Calcium/Vitamin D                                                                 | 123   |
| CLIPS Group 2007 (117)                      | vitams: vitamin E + vitamin C + β-carotene                                        | 366   |
| Cole et al., 2007 – AFPPS (118)             | Folic acid                                                                        | 1021  |
| Cook et al., 2007 – WACS (119)              | β-carotene                                                                        | 8171  |
|                                             | Vitamin C                                                                         | 8171  |
|                                             | Vitamin E                                                                         | 8171  |

|                                      |                                                                                       |       |
|--------------------------------------|---------------------------------------------------------------------------------------|-------|
|                                      | Antioxidants: Vitamin C, Vitamin E and $\beta$ -carotene                              | 2042  |
| Durga et al., 2007 – FACIT (120)     | Folic acid                                                                            | 818   |
| Jamison et al., 2007 – HOST (121)    | Vitamin B complex                                                                     | 2056  |
| Lappe et al., 2007 (122)             | Calcium+Vitamin D                                                                     | 734   |
| Liu et al., 2007 (123)               | Multivitamin                                                                          | 748   |
| Lyons et al., 2007 (124)             | Vitamin D                                                                             | 3440  |
| Plummer et al., 2007 (125)           | Antioxidants: vitamin C + vitamin E + $\beta$ -carotene                               | 1980  |
| Smith et al., 2007 (126)             | Vitamin D                                                                             | 9440  |
| Vianna et al., 2007 (118)            | Folic acid                                                                            | 186   |
| Albert et al., 2008 – WAFACS (119)   | Vitamin B-complex (folic acid, vitamin B <sub>6</sub> , and vitamin B <sub>12</sub> ) | 5442  |
| Bjorkman et al., 2008 (127)          | Vitamin D                                                                             | 141   |
| Bolland et al., 2008 (128)           | Calcium                                                                               | 1471  |
| CTNS 2008 (129)                      | Multivitamins                                                                         | 1020  |
| Ebbing et al., 2008-WENBIT (130)     | B-complex                                                                             | 1552  |
|                                      | Vitamin B6                                                                            | 1552  |
| Guyton et al., 2008 (131)            | Vitamin B3/ niacin                                                                    | 942   |
| Logan et al., 2008 – UK CAP (132)    | Follic acid                                                                           | 939   |
| Milman et al., 2008 (133)            | Vitamin E                                                                             | 1434  |
| Prince et al., 2008 (134)            | Vitamin D with or without calcium                                                     | 302   |
| Reid et al., 2008 (135)              | Calcium                                                                               | 215   |
| Sesso et al., 2008 – PHS II (136)    | Vitamin E with or without Vitamin C                                                   | 7312  |
|                                      | Antioxidants (vitamin E and vitamin C)                                                | 7309  |
|                                      | Vitamin C                                                                             | 7326  |
| Zhu et al., 2008 – CAIFOS (137)      | Calcium + Vitamin D                                                                   | 80    |
| Anker et al., 2009 – FAIR-HF (138)   | Iron                                                                                  | 459   |
| Hodis et al., 2009 – BVAIT (139)     | Vitamin B-complex (folic acid + vitamin B12 + vitamin B6)                             | 506   |
| Imasa et al., 2009 (140)             | Vitamin B-complex (folic acid, vitamin B12, and vitamin B6)                           | 243   |
| LaCroix et al., 2009 – WHI (141)     | Calcium+Vitamin D                                                                     | 36282 |
| Lippman et al., 2009 – SELECT (142)  | Selenium                                                                              | 17766 |
|                                      | Vitamin E                                                                             | 17773 |
|                                      | Selenium and Vitamin E                                                                | 17814 |
| Saposnik et al., 2009 – HOPE 2 (143) | Vitamin B-complex (folic acid, vitamin B12, and vitamin B6)                           | 5522  |

|                                          |                                                                            |       |
|------------------------------------------|----------------------------------------------------------------------------|-------|
| Sang et al., 2009 (144)                  | Vitamin B13/Niacin                                                         | 108   |
| Wu et al., 2009 – NHS/HPFS(145)          | Folic acid                                                                 | 672   |
| Armitage et al., 2010 – SEARCH (146)     | Vitamin B-complex (folic acid, vitamin B12)                                | 12064 |
| Chailurkit et al., 2010 (147)            | Calcium                                                                    | 397   |
| de Zeeuw et al., 2010 – VITAL (148)      | Vitamin D                                                                  | 188   |
| Galan et al., 2010 – SU.FOL.OM3 (149)    | Vitamin B-complex (folic acid, vitamin B12, and vitamin B6)                | 2501  |
| Heinz et al., 2010 (150)                 | Vitamin B-complex (folic acid, vitamin B12, and vitamin B6)                | 650   |
| Hercberg et al., 2010 – SU.VI.MAX (151)  | Antioxidants: (Vitamin C + vitamin E + $\beta$ -carotene + selenium + zinc | 12741 |
| House et al., 2010 – DIVIne (152)        | Vitamin B-complex (folic acid, vitamin B12, and vitamin B6)                | 238   |
| Janssen et al., 2010 (153)               | Vitamin D                                                                  | 70    |
| Salovaara et al., 2010 – OSTRE-FPS (154) | Vitamin D + Calcium                                                        | 3195  |
| Sanders et al., 2010 – Vital D (155)     | Vitamin D                                                                  | 2258  |
| Sanyal et al., 2010 – PIVENS (156)       | Vitamin E                                                                  | 167   |
| VITATOPS Trial Study Group 2010 (157)    | Vitamin B-complex (folic acid, vitamin B12, and vitamin B6)                | 8164  |
| Boden et al., 2011 – AIM HIGH (158)      | Vitamin B3/Niacin                                                          | 3414  |
| Cherniack et al., 2011 (159)             | Vitamin D                                                                  | 46    |
| Grimnes et al., 2011 (160)               | Vitamin D                                                                  | 104   |
| Lewis et al., 2011 – CAIFOS (161)        | Calcium                                                                    | 1460  |
| Gallagher et al., 2012 – VIDOS (162)     | Vitamin D <sub>3</sub>                                                     | 41    |
| Marshall et al., 2011 (163)              | Selenium                                                                   | 423   |
| Alvarez et al., 2012 (164)               | Vitamin D <sub>3</sub>                                                     | 48    |
| Glendenning et al., 2012 (165)           | Vitamin D                                                                  | 686   |
| Lehouck et al., 2012 (166)               | Vitamin D                                                                  | 182   |
| Ma et al., 2012 – SIT (167)              | Antioxidants (Vitamin C + Vitamin E + $\beta$ -carotene + selenium)        | 3411  |
| Punthakee et al., 2012 – TIDE (168)      | Vitamin D                                                                  | 1221  |
| Sesso et al., 2012 – PHS II (169)        | Multivitamin                                                               | 14641 |
| Delanaye et al., 2013 (170)              | Vitamin D                                                                  | 43    |
| Hewitt et al., 2013 (171)                | Vitamin D                                                                  | 60    |
| Lamas et al., 2013 – TACT (172)          | Multivitamins (28-component mixture)                                       | 1708  |
| Manning et al., 2013 (173)               | Vitamin E                                                                  | 76    |
| Prentice et al., 2013 –WHI CaD (174)     | Calcium + Vitamin D <sub>3</sub>                                           | 15302 |
| Witham et al., 2013 – VitDISH (175)      | Vitamin D                                                                  | 159   |
| Witham et al., 2013 (176)                | Vitamin D <sub>3</sub>                                                     | 75    |

|                                              |                                                             |       |
|----------------------------------------------|-------------------------------------------------------------|-------|
| HPS2-THRIVE Collaborative Group 2014 (177)   | Vitamin B3/Niacin                                           | 25673 |
| Wang et al., 2014 – OPERA (178)              | Vitamin D                                                   | 60    |
| Van Wijngaarden et al., 2014 – B-PROOF (179) | Vitamin B-complex (vitamin B <sub>12</sub> + folic acid)    | 3027  |
| Wang et al., 2014 – PHS II (180)             | Vitamin E                                                   | 7312  |
|                                              | Vitamin C                                                   | 7326  |
|                                              | Antioxidants (Vitamin E and C)                              | 7309  |
| Huo et al., 2015 – CSPPT (181)               | Folic acid                                                  | 20702 |
| Ponikowski et al., 2015 – CONFIRM-HF (182)   | Iron                                                        | 301   |
| Wang et al., 2015 (183)                      | Folic acid, vitamin B6, 10 µg vitamin B12                   | 390   |
| Van Dijk et al., 2015 – B-PROOF (184)        | Vitamin B-complex (folic acid, vitamin B12, and vitamin B6) | 3027  |
| Gupta et al., 2016 (185)                     | Calcium + Vitamin D                                         | 53    |
| Lappe et al., 2017 (186)                     | Calcium + Vitamin D                                         | 2303  |
| Brox et al., 2001(187)                       | n-3 LC PUFA                                                 | 80    |
| EPIC-1,2008(188)                             | n-3 LC PUFA                                                 | 374   |
| EPIC-2, 2008 (188)                           | n-3 LC PUFA                                                 | 379   |
| Nye et al., 1990 (189)                       | n-3 LC PUFA                                                 | 73    |
| FOSTAR, 2016(190)                            | n-3 LC PUFA and n-3 ALA PUFA                                | 202   |
| HARP, 1995(191)                              | n-3 LC PUFA                                                 | 59    |
| AFFORD, 2013(192)                            | n-3 LC PUFA vs n-6 PUFA                                     | 337   |
| Berson et al., 2004 (193)                    | n-3 LC PUFA vs n-6 PUFA                                     | 208   |
| Nutristroke et al., 2009 (194)               | n-3 LC PUFA                                                 | 72    |
| Zhang et al., 2017 (195)                     | n-3 LC PUFA vs n-6 PUFA                                     | 240   |
| Bates et al., 1989(196)                      | n-3 LC PUFA                                                 | 312   |
| Derosa et al., 2016(197)                     | n-3 LC PUFA                                                 | 258   |
| Kumar et al., 2013(198)                      | n-3 LC PUFA                                                 | 78    |
| Baldassarre et al., 2006 (199)               | n-3 LC PUFA                                                 | 64    |
| THIS DIET, 2008 (200)                        | n-3 LC PUFA                                                 | 101   |
| SCIMO, 1999(201)                             | n-3 LC PUFA                                                 | 223   |



|                                  |                                             |      |
|----------------------------------|---------------------------------------------|------|
| Shinto et al., 2014(202)         | n-3 LC PUFA                                 | 26   |
| DIPP, 2015(203)                  | n-3 LC PUFA and n-3 ALA PUFA                | 205  |
| Doi et al., 2014(204)            | n-3 LC PUFA                                 | 238  |
| NAT2, 2013(205)                  | n-3 LC PUFA                                 | 263  |
| FORWARD, 2013 (206)              | n-3 LC PUFA                                 | 586  |
| Nodari et al., 2011(207)         | n-3 LC PUFA                                 | 188  |
| Raitt et al., 2005(208)          | n-3 LC PUFA                                 | 200  |
| Ozaydin et al., 2011 (209)       | n-3 LC PUFA                                 | 47   |
| DISAF, 2003(210)                 | n-3 LC PUFA                                 | 407  |
| Shot et al, 1996(211)            | n-3 LC PUFA                                 | 610  |
| SOFA, 2006(212)                  | n-3 LC PUFA and n-6 PUFA                    | 546  |
| OPAL, 2010 (213)                 | n-3 LC PUFA                                 | 748  |
| OFAMI, 2001(214)                 | n-3 LC PUFA                                 | 300  |
| ADCS., 2010(215)                 | n-3 LC PUFA                                 | 402  |
| FAAT, 2005(216)                  | n-3 LC PUFA                                 | 402  |
| DO IT, 2010(217)                 | n-3 LC PUFA                                 | 563  |
| MAPT, 2017 (218)                 | n-3 LC PUFA                                 | 1652 |
| SU.FOL.OM3, 2010 (219)           | n-3 LC PUFA                                 | 2501 |
| OMEGA, 2009(220)                 | n-3 LC PUFA                                 | 54   |
| DART, 1989(221)                  | n-3 LC PUFA/ Reduced saturated fat/n-6 PUFA | 2033 |
| AlphaOmega - EPA+DHA 2010, (222) | n-3 LC PUFA                                 | 4837 |
| ORL, 2013 (223)                  | n-3 LC PUFA                                 | 336  |
| AREDS2, 2014(224)                | n-3 LC PUFA                                 | 4203 |
| EPOCH, 2014 (225, 226)           | n-3 LC PUFA                                 | 391  |
| Proudman et al. 2015 (227, 228)  | n-3 LC PUFA vs n-6 PUFA                     | 122  |
| MAPT-PLUS, 2017 (229)            | n-3 LC PUFA                                 | 1680 |

|                                    |                                                                          |       |
|------------------------------------|--------------------------------------------------------------------------|-------|
| EPE-A, 2014 (230)                  | n-3 LC PUFA                                                              | 174   |
| DART-2,2003 (231)                  | n-3 LC PUFA/Mediterranean diet                                           | 3114  |
| JELIS, 2007 (232)                  | n-3 LC PUFA                                                              | 18645 |
| Risk % Prevention, 2013 (233)      | n-3 LC PUFA                                                              | 12505 |
| ORIGIN, 2012 (234)                 | n-3 LC PUFA                                                              | 12506 |
| GISSI-HF, 2008 (235)               | n-3 LC PUFA                                                              | 6975  |
| Bates et al., 1978 (236)           | n-6 PUFA                                                                 | 58    |
| AlphaOmega-ALA 2010 (222, 237-239) | n-3 ALA                                                                  | 2433  |
| FLAX-PAD 2013 (240)                | n-3 ALA                                                                  | 110   |
| MARGARIN, 2002 (241)               | n-3 ALA                                                                  | 282   |
| Norwegian study, 1968 (242)        | n-3 ALA                                                                  | 13406 |
| WAHA, 2016(243)                    | n-3 ALA                                                                  | 708   |
| Black et al., 1994 (244)           | Reduced dietary fat (lower n-6 PUFA + total PUFA)/ Reduced saturated fat | 133   |
| MCIIMURRAY et al., 1987(245)       | n-6 PUFA                                                                 | 49    |
| MRC, 1968(246)                     | n-6 PUFA/ Modified fat/ Reduced saturated fat                            | 393   |
| NDHS FERIBAULT, 1968(247)          | n-6 PUFA/ Modified dietary fat                                           | 224   |
| ROSE CORN OIL , 1965(248)          | n-6 PUFA/ Reduced saturated fat                                          | 54    |
| SYDNEY DIET HEART, 1978(249)       | n-6 PUFA/ Reduced saturated fat/ Modified dietary fat                    | 458   |
| VETERANS ADMIN, 1969(250)          | n-6 PUFA/ Reduced saturated fat/ Modified dietary fat                    | 846   |
| Vijay Kumar et al., 2014 (251)     | n-6 PUFA                                                                 | 200   |
| GLAMT, 1993 (252)                  | n-6 PUFA                                                                 | 111   |
| Houtsmuller et al. 1979 (253)      | n-6 PUFA                                                                 | 102   |
| Moy et al. 2001 (254)              | Reduced dietary fat intake                                               | 235   |
| Ley et al., 2004 (255)             | Reduced dietary fat/Reduced dietary fat                                  | 176   |
| OSLO DIET HEART, 1966 (256)        | Reduced saturated fat/Modified dietary fat                               | 412   |

|                                       |                                            |                          |
|---------------------------------------|--------------------------------------------|--------------------------|
| STARS, 1992(257)                      | Reduced saturated fat                      | 45                       |
| WHI WITHOUT CVD, 2006(258)            | Reduced saturated fat/ Reduced dietary fat | 48835                    |
| WINS, 2006 (259)                      | Reduced dietary fat                        | 2437                     |
| Ball et al., 1965 (260)               | Reduced dietary fat                        | 252                      |
| POLYP PREVENTION., 1996(261)          | Reduced dietary fat                        | 2079                     |
| Bridges et al., 2001(262)             | Reduced dietary fat                        | 106                      |
| PREMIER,2003 (263)                    | Reduced dietary fat                        | 537                      |
| DO IT 2006 (264)                      | Reduced dietary fat                        | 487                      |
| WHEL., 2007 (265)                     | Reduced dietary fat                        | 3088                     |
| Rose et al., 1965 (266)               | Modified dietary fat                       | 52                       |
| MINNESOTA CORON WOMEN/MEN., 1989(267) | Modified dietary fat                       | Women (4664), Men (4664) |
| Chang et al., 2006 (268)              | Salt reduction                             | 1981                     |
| CSSS., 2007(269)                      | Salt reduction                             | 608                      |
| Kwok et al., 2012 (270)               | Salt reduction                             | 429                      |
| Morgan et al., 1978(271)              | Salt reduction                             | 67                       |
| TONE., 1998 (272)                     | Salt reduction                             | 681                      |
| HPT., 1990(273)                       | Salt reduction                             | 392                      |
| TOHP1., 1992 (274)                    | Salt reduction                             | 744                      |
| TOHP2, 1997 (275)                     | Salt reduction                             | 2382                     |
| PREDIMED, 2013 (276)                  | Mediterranean diet                         | 7447                     |
| Ng et al., 2011(277)                  | Mediterranean diet                         | 48                       |
| Singh et al.,(278)                    | Mediterranean diet                         | 1000                     |
| de Lorgeril et al., 1994 (279)        | Mediaterranean diet                        | 605                      |
| CLAS, 1987 (280)                      | Vitamin B3/Niacin                          | 188                      |
| Whitney et al., 2005 (281)            | Vitamin B3/Niacin                          | 143                      |
| VITAL, 2018 (282)                     | Vitamin D                                  | 25,871                   |

|                         |              |        |
|-------------------------|--------------|--------|
| VIDA, 2017 (283)        | Vitamin D    | 5,108  |
| *ONTARGET, 2008 (284)   | Reduced salt | 28757  |
| * TRANSCEND, 2008 (285) | Reduced salt |        |
| VITAL, 2018 (286)       | n-3 LC PUFA  | 25,871 |
| ASCEND, 2018 (287)      | n-3 LC PUFA  | 15,480 |

\* ONTARGET was a randomised, double-blind, parallel trial comparing the effects of ramipril (10 mg/day), telmisartan (80 mg/day), and combination therapy of ramipril (10 mg/day) and telmisartan (80 mg/day) in 25 620 patients, with vascular disease or high-risk patients with diabetes. TRANSCEND was a randomised controlled trial comparing telmisartan (80 mg/day) with placebo in 5926 participants who were intolerant to angiotensin converting enzyme inhibitors. For this analysis, we included 28 757 participants from individual patient meta-analysis ONTARGET and TRANSCEND by Mente et al.

**Supplement Table 4. Methodological Quality Assessment of Included Systematic Reviews and Meta-analyses**

| Author (Year)                   | Appropriate search criteria | Appropriate selection criteria | Method of pooling estimates  | Assessment of risk of bias | Assessment of Publication bias | Assessment of heterogeneity |
|---------------------------------|-----------------------------|--------------------------------|------------------------------|----------------------------|--------------------------------|-----------------------------|
| Jenkins D et al. (2018) (1)     | Yes                         | Yes                            | Random effects               | Yes                        | Yes                            | Yes                         |
| Riaz H et al. (2018) (2)        | Yes                         | Yes                            | Random effects               | Yes                        | Yes                            | Yes                         |
| Abdelhamid AS et al. (2018) (3) | Yes                         | Yes                            | Random effects/Fixed effects | Yes                        | Yes                            | Yes                         |
| Hooper L et al. (2018) (4)      | Yes                         | Yes                            | Random effects/Fixed effects | Yes                        | Yes                            | Yes                         |
| Liyanage T et al. (2016) (5)    | Yes                         | Yes                            | Fixed effects                | Yes                        | No                             | No                          |
| Adler AJ et al. (2014) (6)      | Yes                         | Yes                            | Fixed effects/Random effects | Yes                        | No                             | Yes                         |
| *Mente A et al. (2016) (7)      | Yes                         | No                             | No                           | No                         | No                             | No                          |
| Hooper L et al. (2012) (8)      | Yes                         | Yes                            | Random effects/Fixed effects | Yes                        | Yes                            | Yes                         |
| Hooper L et al. (2015) (9)      | Yes                         | Yes                            | Random effects/Fixed effects | Yes                        | Yes                            | Yes                         |

\* Mente A et al. was individual level analysis of 4 studies.

**Supplement Table 5 (a-x). GRADE Scale for Quality Assessment of Evidence**

**a. Vitamin E Compared to Control for Mortality and Cardiovascular Outcomes**

| Certainty assessment            |                   |              |                           |                             |                           |                                                  | Effect                           | Certainty        |
|---------------------------------|-------------------|--------------|---------------------------|-----------------------------|---------------------------|--------------------------------------------------|----------------------------------|------------------|
| No of studies                   | Study design      | Risk of bias | Inconsistency             | Indirectness                | Imprecision               | Other considerations                             | Relative (95% CI)                |                  |
| <b>All-cause mortality</b>      |                   |              |                           |                             |                           |                                                  |                                  |                  |
| 32                              | randomised trials | not serious  | not serious               | very serious <sup>a,b</sup> | not serious <sup>c</sup>  | none <sup>d</sup>                                | <b>RR 1.00</b><br>(0.97 to 1.03) | ⊕⊕○○<br>LOW      |
| <b>Cardiovascular mortality</b> |                   |              |                           |                             |                           |                                                  |                                  |                  |
| 11                              | randomised trials | not serious  | not serious <sup>e</sup>  | very serious <sup>a</sup>   | serious <sup>c</sup>      | none                                             | <b>RR 0.95</b><br>(0.88 to 1.03) | ⊕○○○<br>VERY LOW |
| <b>MI</b>                       |                   |              |                           |                             |                           |                                                  |                                  |                  |
| 10                              | randomised trials | not serious  | very serious <sup>e</sup> | very serious <sup>a</sup>   | serious <sup>c</sup>      | publication bias strongly suspected <sup>d</sup> | <b>RR 0.83</b><br>(0.65 to 1.05) | ⊕○○○<br>VERY LOW |
| <b>Stroke</b>                   |                   |              |                           |                             |                           |                                                  |                                  |                  |
| 11                              | randomised trials | not serious  | not serious <sup>e</sup>  | very serious <sup>b</sup>   | very serious <sup>c</sup> | publication bias strongly suspected <sup>d</sup> | <b>RR 0.98</b><br>(0.87 to 1.10) | ⊕○○○<br>VERY LOW |
| <b>CHD</b>                      |                   |              |                           |                             |                           |                                                  |                                  |                  |
| 2                               | randomised trials | not serious  | not serious <sup>e</sup>  | very serious <sup>a</sup>   | serious <sup>c</sup>      | none                                             | <b>RR 0.97</b><br>(0.90 to 1.05) | ⊕○○○<br>VERY LOW |

a. Indirectness was considered serious if cumulative evidence was derived from trials assessing interventions in participants with varying baseline cardiovascular risk, i.e. primary or secondary prevention trials, b. Indirectness was considered very serious if cumulative evidence was derived from trials assessing interventions in participants with wide variety of indications i.e. non cardiovascular diseases and cardiovascular diseases, c. Serious imprecision was considered if the 95% confidence intervals overlaps with the minimally important difference for clinical benefit (RR<0.95) or harm (RR>1.05). Very serious imprecision was considered if the 95% confidence intervals include both clinically important benefit (RR<0.95) and harm (RR>1.05).

## b. Vitamin C Compared to Control for Mortality and Cardiovascular Outcomes

| Certainty assessment            |                   |              |                          |                            |                           |                      | Effect                           | Certainty   |
|---------------------------------|-------------------|--------------|--------------------------|----------------------------|---------------------------|----------------------|----------------------------------|-------------|
| No of studies                   | Study design      | Risk of bias | Inconsistency            | Indirectness               | Imprecision               | Other considerations | Relative (95% CI)                |             |
| <b>All-cause mortality</b>      |                   |              |                          |                            |                           |                      |                                  |             |
| 4                               | randomised trials | not serious  | not serious              | not serious <sup>a,b</sup> | very serious <sup>c</sup> | none <sup>d</sup>    | <b>RR 1.02</b><br>(0.94 to 1.11) | ⊕⊕○○<br>LOW |
| <b>Cardiovascular mortality</b> |                   |              |                          |                            |                           |                      |                                  |             |
| 2                               | randomised trials | not serious  | not serious <sup>e</sup> | not serious <sup>a</sup>   | very serious <sup>c</sup> | none                 | <b>RR 1.07</b><br>(0.87 to 1.33) | ⊕⊕○○<br>LOW |
| <b>MI</b>                       |                   |              |                          |                            |                           |                      |                                  |             |
| 2                               | randomised trials | not serious  | not serious <sup>e</sup> | not serious <sup>a</sup>   | very serious <sup>c</sup> | none                 | <b>RR 0.96</b><br>(0.32 to 2.89) | ⊕⊕○○<br>LOW |
| <b>Stroke</b>                   |                   |              |                          |                            |                           |                      |                                  |             |
| 2                               | randomised trials | not serious  | not serious <sup>e</sup> | not serious <sup>b</sup>   | very serious <sup>c</sup> | none                 | <b>RR 0.92</b><br>(0.35 to 2.40) | ⊕⊕○○<br>LOW |
| <b>CHD</b>                      |                   |              |                          |                            |                           |                      |                                  |             |
| 1                               | randomised trials | not serious  | not serious <sup>e</sup> | not serious <sup>a</sup>   | very serious <sup>c</sup> | none                 | <b>RR 1.04</b><br>(0.93 to 1.17) | ⊕⊕○○<br>LOW |

a. Indirectness was considered serious if cumulative evidence was derived from trials assessing interventions in participants with varying baseline cardiovascular risk, i.e. primary or secondary prevention trials, b. Indirectness was considered very serious if cumulative evidence was derived from trials assessing interventions in participants with wide variety of indications i.e. non cardiovascular diseases and cardiovascular diseases, c. Serious imprecision was considered if the 95% confidence intervals overlaps with the minimally important difference for clinical benefit (RR<0.95) or harm (RR>1.05). Very serious imprecision was considered if the 95% confidence intervals include both clinically important benefit (RR<0.95) and harm (RR>1.05).

**c. Vitamin B-Complex Compared to Control for Mortality and Cardiovascular Outcomes**

| Certainty assessment            |                   |              |                           |                            |                           |                      | Effect                           | Certainty        |
|---------------------------------|-------------------|--------------|---------------------------|----------------------------|---------------------------|----------------------|----------------------------------|------------------|
| No of studies                   | Study design      | Risk of bias | Inconsistency             | Indirectness               | Imprecision               | Other considerations | Relative (95% CI)                |                  |
| <b>All-cause mortality</b>      |                   |              |                           |                            |                           |                      |                                  |                  |
| 16                              | randomised trials | not serious  | not serious               | not serious <sup>a,b</sup> | serious <sup>c</sup>      | none <sup>d</sup>    | <b>RR 1.02</b><br>(0.97 to 1.07) | ⊕⊕⊕○<br>MODERATE |
| <b>Cardiovascular mortality</b> |                   |              |                           |                            |                           |                      |                                  |                  |
| 5                               | randomised trials | not serious  | very serious <sup>e</sup> | not serious <sup>a</sup>   | very serious <sup>c</sup> | none                 | <b>RR 1.00</b><br>(0.79 to 1.26) | ⊕○○○<br>VERY LOW |
| <b>MI</b>                       |                   |              |                           |                            |                           |                      |                                  |                  |
| 13                              | randomised trials | not serious  | not serious <sup>e</sup>  | not serious <sup>a</sup>   | very serious <sup>c</sup> | none                 | <b>RR 1.00</b><br>(0.94 to 1.07) | ⊕⊕○○<br>LOW      |
| <b>Stroke</b>                   |                   |              |                           |                            |                           |                      |                                  |                  |
| 12                              | randomised trials | not serious  | not serious <sup>e</sup>  | not serious <sup>b</sup>   | serious <sup>c</sup>      | none                 | <b>RR 0.90</b><br>(0.80 to 1.01) | ⊕⊕⊕○<br>MODERATE |
| <b>CHD</b>                      |                   |              |                           |                            |                           |                      |                                  |                  |
| 5                               | randomised trials | not serious  | not serious <sup>e</sup>  | not serious <sup>a</sup>   | very serious <sup>c</sup> | none                 | <b>RR 1.05</b><br>(0.90 to 1.23) | ⊕⊕○○<br>LOW      |

a. Indirectness was considered serious if cumulative evidence was derived from trials assessing interventions in participants with varying baseline cardiovascular risk, i.e. primary or secondary prevention trials, b. Indirectness was considered very serious if cumulative evidence was derived from trials assessing interventions in participants with wide variety of indications i.e. non cardiovascular diseases and cardiovascular diseases, c. Serious imprecision was considered if the 95% confidence intervals overlaps with the minimally important difference for clinical benefit (RR<0.95) or harm (RR>1.05). Very serious imprecision was considered if the 95% confidence intervals include both clinically important benefit (RR<0.95) and harm (RR>1.05).



#### d. Vitamin B6 Compared to Control for Mortality and Cardiovascular Outcomes

| Certainty assessment       |                   |              |                          |                            |                           |                      | Effect                           | Certainty        |
|----------------------------|-------------------|--------------|--------------------------|----------------------------|---------------------------|----------------------|----------------------------------|------------------|
| No of studies              | Study design      | Risk of bias | Inconsistency            | Indirectness               | Imprecision               | Other considerations | Relative (95% CI)                |                  |
| <b>All-cause mortality</b> |                   |              |                          |                            |                           |                      |                                  |                  |
| 2                          | randomised trials | not serious  | not serious              | not serious <sup>a,b</sup> | very serious <sup>c</sup> | none <sup>d</sup>    | <b>RR 1.02</b><br>(0.59 to 1.76) | ⊕⊕○○<br>LOW      |
| <b>MI</b>                  |                   |              |                          |                            |                           |                      |                                  |                  |
| 2                          | randomised trials | not serious  | not serious <sup>e</sup> | not serious <sup>a</sup>   | very serious <sup>c</sup> | none                 | <b>RR 1.04</b><br>(0.59 to 1.82) | ⊕⊕○○<br>LOW      |
| <b>Stroke</b>              |                   |              |                          |                            |                           |                      |                                  |                  |
| 2                          | randomised trials | not serious  | not serious <sup>e</sup> | serious <sup>b</sup>       | very serious <sup>c</sup> | none                 | <b>RR 0.92</b><br>(0.18 to 4.67) | ⊕○○○<br>VERY LOW |

- a. Indirectness was considered serious if cumulative evidence was derived from trials assessing interventions in participants with varying baseline cardiovascular risk, i.e. primary or secondary prevention trials, b. Indirectness was considered very serious if cumulative evidence was derived from trials assessing interventions in participants with wide variety of indications i.e. non cardiovascular diseases and cardiovascular diseases, c. Serious imprecision was considered if the 95% confidence intervals overlaps with the minimally important difference for clinical benefit (RR<0.95) or harm (RR>1.05). Very serious imprecision was considered if the 95% confidence intervals include both clinically important benefit (RR<0.95) and harm (RR>1.05).

**e. Vitamin B3/Niacin Compared to Control for Mortality and Cardiovascular Outcomes**

| Certainty assessment            |                   |              |                           |                        |                           |                      | Effect                           | Certainty        |
|---------------------------------|-------------------|--------------|---------------------------|------------------------|---------------------------|----------------------|----------------------------------|------------------|
| No of studies                   | Study design      | Risk of bias | Inconsistency             | Indirectness           | Imprecision               | Other considerations | Relative (95% CI)                |                  |
| <b>All-cause mortality</b>      |                   |              |                           |                        |                           |                      |                                  |                  |
| 5                               | randomised trials | not serious  | not serious               | serious <sup>a,b</sup> | very serious <sup>c</sup> | none <sup>d</sup>    | <b>RR 1.04</b><br>(0.94 to 1.16) | ⊕○○○<br>VERY LOW |
| <b>Cardiovascular mortality</b> |                   |              |                           |                        |                           |                      |                                  |                  |
| 4                               | randomised trials | not serious  | not serious <sup>e</sup>  | serious <sup>a</sup>   | very serious <sup>c</sup> | none                 | <b>RR 0.95</b><br>(0.82 to 1.11) | ⊕○○○<br>VERY LOW |
| <b>MI</b>                       |                   |              |                           |                        |                           |                      |                                  |                  |
| 6                               | randomised trials | not serious  | serious <sup>e</sup>      | serious <sup>a</sup>   | very serious <sup>c</sup> | none                 | <b>RR 0.89</b><br>(0.72 to 1.10) | ⊕○○○<br>VERY LOW |
| <b>Stroke</b>                   |                   |              |                           |                        |                           |                      |                                  |                  |
| 5                               | randomised trials | not serious  | very serious <sup>e</sup> | serious <sup>b</sup>   | very serious <sup>c</sup> | none                 | <b>RR 0.96</b><br>(0.56 to 1.66) | ⊕○○○<br>VERY LOW |
| <b>CHD</b>                      |                   |              |                           |                        |                           |                      |                                  |                  |
| 2                               | randomised trials | not serious  | not serious <sup>e</sup>  | serious <sup>a</sup>   | very serious <sup>c</sup> | none                 | <b>RR 0.96</b><br>(0.87 to 1.06) | ⊕○○○<br>VERY LOW |

a. Indirectness was considered serious if cumulative evidence was derived from trials assessing interventions in participants with varying baseline cardiovascular risk, i.e. primary or secondary prevention trials, b. Indirectness was considered very serious if cumulative evidence was derived from trials assessing interventions in participants with wide variety of indications i.e. non cardiovascular diseases and cardiovascular diseases, c. Serious imprecision was considered if the 95% confidence intervals overlaps with the minimally important difference for clinical benefit (RR<0.95) or harm (RR>1.05). Very serious imprecision was considered if the 95% confidence intervals include both clinically important benefit (RR<0.95) and harm (RR>1.05).

**f. Vitamin A Compared to Control for Mortality and Cardiovascular Outcomes**

| Certainty assessment       |                   |              |               |                            |                           |                      | Effect                           | Certainty   |
|----------------------------|-------------------|--------------|---------------|----------------------------|---------------------------|----------------------|----------------------------------|-------------|
| No of studies              | Study design      | Risk of bias | Inconsistency | Indirectness               | Imprecision               | Other considerations | Relative (95% CI)                |             |
| <b>All-cause mortality</b> |                   |              |               |                            |                           |                      |                                  |             |
| 1                          | randomised trials | not serious  | not serious   | not serious <sup>a,b</sup> | very serious <sup>c</sup> | none <sup>d</sup>    | <b>RR 0.99</b><br>(0.56 to 1.72) | ⊕⊕○○<br>LOW |

- a. Indirectness was considered serious if cumulative evidence was derived from trials assessing interventions in participants with varying baseline cardiovascular risk, i.e. primary or secondary prevention trials, b. Indirectness was considered very serious if cumulative evidence was derived from trials assessing interventions in participants with wide variety of indications i.e. non cardiovascular diseases and cardiovascular diseases, c. Serious imprecision was considered if the 95% confidence intervals overlaps with the minimally important difference for clinical benefit (RR<0.95) or harm (RR>1.05). Very serious imprecision was considered if the 95% confidence intervals include both clinically important benefit (RR<0.95) and harm (RR>1.05).

**g. Selenium Compared to Control for Mortality and Cardiovascular Outcomes**

| Certainty assessment            |                   |              |                          |                             |                           |                      | Effect                           | Certainty        |
|---------------------------------|-------------------|--------------|--------------------------|-----------------------------|---------------------------|----------------------|----------------------------------|------------------|
| No of studies                   | Study design      | Risk of bias | Inconsistency            | Indirectness                | Imprecision               | Other considerations | Relative (95% CI)                |                  |
| <b>All-cause mortality</b>      |                   |              |                          |                             |                           |                      |                                  |                  |
| 4                               | randomised trials | not serious  | not serious              | very serious <sup>a,b</sup> | very serious <sup>c</sup> | none <sup>d</sup>    | <b>RR 0.99</b><br>(0.89 to 1.10) | ⊕○○○<br>VERY LOW |
| <b>Cardiovascular mortality</b> |                   |              |                          |                             |                           |                      |                                  |                  |
| 3                               | randomised trials | not serious  | serious <sup>e</sup>     | very serious <sup>a</sup>   | very serious <sup>c</sup> | none                 | <b>RR 0.92</b><br>(0.15 to 5.63) | ⊕○○○<br>VERY LOW |
| <b>MI</b>                       |                   |              |                          |                             |                           |                      |                                  |                  |
| 2                               | randomised trials | not serious  | not serious <sup>e</sup> | very serious <sup>a</sup>   | very serious <sup>c</sup> | none                 | <b>RR 0.93</b><br>(0.25 to 3.45) | ⊕○○○<br>VERY LOW |
| <b>Stroke</b>                   |                   |              |                          |                             |                           |                      |                                  |                  |
| 2                               | randomised trials | not serious  | not serious <sup>e</sup> | very serious <sup>b</sup>   | very serious <sup>c</sup> | none                 | <b>RR 0.89</b><br>(0.19 to 4.27) | ⊕○○○<br>VERY LOW |
| <b>CHD</b>                      |                   |              |                          |                             |                           |                      |                                  |                  |
| 1                               | randomised trials | not serious  | not serious              | not serious                 | very serious <sup>c</sup> | none                 | <b>RR 1.06</b><br>(0.76 to 1.48) | ⊕⊕○○<br>LOW      |

- a. Indirectness was considered serious if cumulative evidence was derived from trials assessing interventions in participants with varying baseline cardiovascular risk, i.e. primary or secondary prevention trials, b. Indirectness was considered very serious if cumulative evidence was derived from trials assessing interventions in participants with wide variety of indications i.e. non cardiovascular diseases and cardiovascular diseases, c. Serious imprecision was considered if the 95% confidence intervals overlaps with the minimally important difference for clinical benefit (RR<0.95) or harm (RR>1.05). Very serious imprecision was considered if the 95% confidence intervals include both clinically important benefit (RR<0.95) and harm (RR>1.05).

## h. Multivitamins Compared to Control for Mortality and Cardiovascular Outcomes

| Certainty assessment            |                   |              |                           |                            |                           |                      | Effect                            | Certainty        |
|---------------------------------|-------------------|--------------|---------------------------|----------------------------|---------------------------|----------------------|-----------------------------------|------------------|
| No of studies                   | Study design      | Risk of bias | Inconsistency             | Indirectness               | Imprecision               | Other considerations | Relative (95% CI)                 |                  |
| <b>All-cause mortality</b>      |                   |              |                           |                            |                           |                      |                                   |                  |
| 10                              | randomised trials | not serious  | not serious               | not serious <sup>a,b</sup> | serious <sup>c</sup>      | none <sup>d</sup>    | <b>RR 0.95</b><br>(0.90 to 1.01)  | ⊕⊕⊕○<br>MODERATE |
| <b>Cardiovascular mortality</b> |                   |              |                           |                            |                           |                      |                                   |                  |
| 3                               | randomised trials | not serious  | not serious <sup>e</sup>  | not serious <sup>a</sup>   | very serious <sup>c</sup> | none                 | <b>RR 0.94</b><br>(0.74 to 1.19)  | ⊕⊕○○<br>LOW      |
| <b>MI</b>                       |                   |              |                           |                            |                           |                      |                                   |                  |
| 3                               | randomised trials | not serious  | not serious <sup>e</sup>  | not serious <sup>a</sup>   | very serious <sup>c</sup> | none                 | <b>RR 0.95</b><br>(0.82 to 1.09)  | ⊕⊕○○<br>LOW      |
| <b>Stroke</b>                   |                   |              |                           |                            |                           |                      |                                   |                  |
| 2                               | randomised trials | not serious  | very serious <sup>e</sup> | not serious                | very serious <sup>c</sup> | none                 | <b>RR 0.86</b><br>(0.01 to 50.30) | ⊕○○○<br>VERY LOW |

- a. Indirectness was considered serious if cumulative evidence was derived from trials assessing interventions in participants with varying baseline cardiovascular risk, i.e. primary or secondary prevention trials, b. Indirectness was considered very serious if cumulative evidence was derived from trials assessing interventions in participants with wide variety of indications i.e. non cardiovascular diseases and cardiovascular diseases, c. Serious imprecision was considered if the 95% confidence intervals overlaps with the minimally important difference for clinical benefit (RR<0.95) or harm (RR>1.05). Very serious imprecision was considered if the 95% confidence intervals include both clinically important benefit (RR<0.95) and harm (RR>1.05).

**i. Iron Compared to Control for Mortality and Cardiovascular Outcomes**

| Certainty assessment            |                   |              |                          |                            |                           |                      | Effect                            | Certainty   |
|---------------------------------|-------------------|--------------|--------------------------|----------------------------|---------------------------|----------------------|-----------------------------------|-------------|
| No of studies                   | Study design      | Risk of bias | Inconsistency            | Indirectness               | Imprecision               | Other considerations | Relative (95% CI)                 |             |
| <b>All-cause mortality</b>      |                   |              |                          |                            |                           |                      |                                   |             |
| 2                               | randomised trials | not serious  | not serious              | not serious <sup>a,b</sup> | very serious <sup>c</sup> | none <sup>d</sup>    | <b>RR 0.79</b><br>(0.16 to 3.85)  | ⊕⊕○○<br>LOW |
| <b>Cardiovascular mortality</b> |                   |              |                          |                            |                           |                      |                                   |             |
| 2                               | randomised trials | not serious  | not serious <sup>e</sup> | not serious <sup>a</sup>   | very serious <sup>c</sup> | none                 | <b>RR 0.80</b><br>(0.03 to 20.50) | ⊕⊕○○<br>LOW |
| <b>MI</b>                       |                   |              |                          |                            |                           |                      |                                   |             |
| 1                               | randomised trials | not serious  | not serious <sup>e</sup> | not serious <sup>a</sup>   | very serious <sup>c</sup> | none                 | <b>RR 0.34</b><br>(0.06 to 2.01)  | ⊕⊕○○<br>LOW |

a. Indirectness was considered serious if cumulative evidence was derived from trials assessing interventions in participants with varying baseline cardiovascular risk, i.e. primary or secondary prevention trials, b. Indirectness was considered very serious if cumulative evidence was derived from trials assessing interventions in participants with wide variety of indications i.e. non cardiovascular diseases and cardiovascular diseases, c. Serious imprecision was considered if the 95% confidence intervals overlaps with the minimally important difference for clinical benefit (RR<0.95) or harm (RR>1.05). Very serious imprecision was considered if the 95% confidence intervals include both clinically important benefit (RR<0.95) and harm (RR>1.05).

j. Folic Acid Compared to Control for Mortality and Cardiovascular Outcomes

| Certainty assessment            |                   |              |                          |                        |                           |                      | Effect                            | Certainty        |
|---------------------------------|-------------------|--------------|--------------------------|------------------------|---------------------------|----------------------|-----------------------------------|------------------|
| No of studies                   | Study design      | Risk of bias | Inconsistency            | Indirectness           | Imprecision               | Other considerations | Relative (95% CI)                 |                  |
| <b>All-cause mortality</b>      |                   |              |                          |                        |                           |                      |                                   |                  |
| 10                              | randomised trials | not serious  | not serious              | serious <sup>a,b</sup> | very serious <sup>c</sup> | none                 | <b>RR 0.85</b><br>(0.65 to 1.10)  | ⊕○○○<br>VERY LOW |
| <b>Cardiovascular mortality</b> |                   |              |                          |                        |                           |                      |                                   |                  |
| 5                               | randomised trials | not serious  | not serious <sup>d</sup> | serious <sup>a</sup>   | very serious <sup>c</sup> | none                 | <b>RR 0.89</b><br>(0.68 to 1.17)  | ⊕○○○<br>VERY LOW |
| <b>MI</b>                       |                   |              |                          |                        |                           |                      |                                   |                  |
| 6                               | randomised trials | not serious  | not serious <sup>d</sup> | serious <sup>a</sup>   | very serious <sup>c</sup> | none                 | <b>RR 1.22</b><br>(0.66 to 2.24)  | ⊕○○○<br>VERY LOW |
| <b>Stroke</b>                   |                   |              |                          |                        |                           |                      |                                   |                  |
| 7                               | randomised trials | not serious  | not serious              | serious <sup>a</sup>   | serious <sup>c</sup>      | none                 | <b>RR 0.80</b><br>(0.67 to 0.96)  | ⊕⊕○○<br>LOW      |
| <b>CHD</b>                      |                   |              |                          |                        |                           |                      |                                   |                  |
| 2                               | randomised trials | not serious  | not serious              | serious <sup>a</sup>   | very serious <sup>c</sup> | none                 | <b>RR 1.47</b><br>(0.10 to 22.50) | ⊕○○○<br>VERY LOW |

a. Indirectness was considered serious if cumulative evidence was derived from trials assessing interventions in participants with varying baseline cardiovascular risk, i.e. primary or secondary prevention trials, b. Indirectness was considered very serious if cumulative evidence was derived from trials assessing interventions in participants with wide variety of indications i.e. non cardiovascular diseases and cardiovascular diseases, c. Serious imprecision was considered if the 95% confidence intervals overlaps with the minimally important difference for clinical benefit (RR<0.95) or harm (RR>1.05). Very serious imprecision was considered if the 95% confidence intervals include both clinically important benefit (RR<0.95) and harm (RR>1.05).

**k. Calcium Compared to Control for Mortality and Cardiovascular Outcomes**

| Certainty assessment            |                   |              |                           |                            |                           |                      | Effect                               | Certainty        |
|---------------------------------|-------------------|--------------|---------------------------|----------------------------|---------------------------|----------------------|--------------------------------------|------------------|
| No of studies                   | Study design      | Risk of bias | Inconsistency             | Indirectness               | Imprecision               | Other considerations | Relative (95% CI)                    |                  |
| <b>All-cause mortality</b>      |                   |              |                           |                            |                           |                      |                                      |                  |
| 6                               | randomised trials | not serious  | not serious               | not serious <sup>a,b</sup> | serious <sup>c</sup>      | none                 | <b>RR 1.08</b><br>(0.97 to 1.20)     | ⊕⊕⊕○<br>MODERATE |
| <b>Cardiovascular mortality</b> |                   |              |                           |                            |                           |                      |                                      |                  |
| 2                               | randomised trials | not serious  | serious <sup>d</sup>      | not serious <sup>a</sup>   | very serious <sup>c</sup> | none                 | <b>RR 1.24</b><br>(0.00 to 21640.00) | ⊕○○○<br>VERY LOW |
| <b>MI</b>                       |                   |              |                           |                            |                           |                      |                                      |                  |
| 4                               | randomised trials | not serious  | very serious <sup>d</sup> | not serious <sup>a</sup>   | very serious <sup>c</sup> | none                 | <b>RR 1.64</b><br>(0.75 to 3.62)     | ⊕○○○<br>VERY LOW |
| <b>Stroke</b>                   |                   |              |                           |                            |                           |                      |                                      |                  |
| 3                               | randomised trials | not serious  | not serious               | not serious <sup>a</sup>   | very serious <sup>c</sup> | none                 | <b>RR 1.29</b><br>(0.76 to 2.18)     | ⊕⊕○○<br>LOW      |
| <b>CHD</b>                      |                   |              |                           |                            |                           |                      |                                      |                  |
| 2                               | randomised trials | not serious  | not serious               | not serious                | very serious <sup>c</sup> | none                 | <b>RR 1.16</b><br>(0.44 to 3.05)     | ⊕⊕○○<br>LOW      |

a. Indirectness was considered serious if cumulative evidence was derived from trials assessing interventions in participants with varying baseline cardiovascular risk, i.e. primary or secondary prevention trials, b. Indirectness was considered very serious if cumulative evidence was derived from trials assessing interventions in participants with wide variety of indications i.e. non cardiovascular diseases and cardiovascular diseases, c. Serious imprecision was considered if the 95% confidence intervals overlaps with the minimally important difference for clinical benefit (RR<0.95) or harm (RR>1.05). Very serious imprecision was considered if the 95% confidence intervals include both clinically important benefit (RR<0.95) and harm (RR>1.05).



## I. Calcium + Vitamin D Compared to Control for Mortality and Cardiovascular Outcomes

| Certainty assessment            |                   |              |               |                            |                           |                      | Effect                              | Certainty        |
|---------------------------------|-------------------|--------------|---------------|----------------------------|---------------------------|----------------------|-------------------------------------|------------------|
| No of studies                   | Study design      | Risk of bias | Inconsistency | Indirectness               | Imprecision               | Other considerations | Relative (95% CI)                   |                  |
| <b>All-cause mortality</b>      |                   |              |               |                            |                           |                      |                                     |                  |
| 20                              | randomised trials | not serious  | not serious   | not serious <sup>a,b</sup> | serious <sup>c</sup>      | none                 | <b>RR 0.95</b><br>(0.90 to 1.00)    | ⊕⊕⊕○<br>MODERATE |
| <b>Cardiovascular mortality</b> |                   |              |               |                            |                           |                      |                                     |                  |
| 1                               | randomised trials | not serious  | not serious   | not serious <sup>a</sup>   | serious <sup>c</sup>      | none                 | <b>RR 0.99</b><br>(0.95 to 1.03)    | ⊕⊕⊕○<br>MODERATE |
| <b>MI</b>                       |                   |              |               |                            |                           |                      |                                     |                  |
| 5                               | randomised trials | not serious  | not serious   | not serious <sup>a</sup>   | serious <sup>c</sup>      | none                 | <b>RR 1.14</b><br>(0.97 to 1.34)    | ⊕⊕⊕○<br>MODERATE |
| <b>Stroke</b>                   |                   |              |               |                            |                           |                      |                                     |                  |
| 7                               | randomised trials | not serious  | not serious   | not serious <sup>a</sup>   | serious <sup>c</sup>      | none                 | <b>RR 1.17</b><br>(1.05 to 1.30)    | ⊕⊕⊕○<br>MODERATE |
| <b>CHD</b>                      |                   |              |               |                            |                           |                      |                                     |                  |
| 2                               | randomised trials | not serious  | not serious   | not serious                | very serious <sup>c</sup> | none                 | <b>RR 0.73</b><br>(0.00 to 3449.00) | ⊕⊕○○<br>LOW      |

- a. Indirectness was considered serious if cumulative evidence was derived from trials assessing interventions in participants with varying baseline cardiovascular risk, i.e. primary or secondary prevention trials, b. Indirectness was considered very serious if cumulative evidence was derived from trials assessing interventions in participants with wide variety of indications i.e. non cardiovascular diseases and cardiovascular diseases, c. Serious imprecision was considered if the 95% confidence intervals overlaps with the minimally important difference for clinical benefit (RR<0.95) or harm (RR>1.05). Very serious imprecision was considered if the 95% confidence intervals include both clinically important benefit (RR<0.95) and harm (RR>1.05).

**m. Beta Carotene Compared to Control for Mortality and Cardiovascular Outcomes**

| Certainty assessment            |                   |              |               |                            |                           |                      | Effect                           | Certainty   |
|---------------------------------|-------------------|--------------|---------------|----------------------------|---------------------------|----------------------|----------------------------------|-------------|
| No of studies                   | Study design      | Risk of bias | Inconsistency | Indirectness               | Imprecision               | Other considerations | Relative (95% CI)                |             |
| <b>All-cause mortality</b>      |                   |              |               |                            |                           |                      |                                  |             |
| 6                               | randomised trials | not serious  | not serious   | not serious <sup>a,b</sup> | very serious <sup>c</sup> | none                 | <b>RR 1.03</b><br>(0.94 to 1.13) | ⊕⊕○○<br>LOW |
| <b>Cardiovascular mortality</b> |                   |              |               |                            |                           |                      |                                  |             |
| 4                               | randomised trials | not serious  | not serious   | not serious <sup>a</sup>   | very serious <sup>c</sup> | none                 | <b>RR 1.10</b><br>(0.93 to 1.30) | ⊕⊕○○<br>LOW |
| <b>MI</b>                       |                   |              |               |                            |                           |                      |                                  |             |
| 3                               | randomised trials | not serious  | not serious   | not serious <sup>a</sup>   | very serious <sup>c</sup> | none                 | <b>RR 0.99</b><br>(0.86 to 1.15) | ⊕⊕○○<br>LOW |
| <b>Stroke</b>                   |                   |              |               |                            |                           |                      |                                  |             |
| 3                               | randomised trials | not serious  | not serious   | not serious <sup>a</sup>   | <b>Stroke</b>             | none                 | <b>RR 1.06</b><br>(0.83 to 1.35) | ⊕⊕○○<br>LOW |
| <b>CHD</b>                      |                   |              |               |                            |                           |                      |                                  |             |
| 2                               | randomised trials | not serious  | not serious   | not serious                | very serious <sup>c</sup> | none                 | <b>RR 1.02</b><br>(0.86 to 1.21) | ⊕⊕○○<br>LOW |

a. Indirectness was considered serious if cumulative evidence was derived from trials assessing interventions in participants with varying baseline cardiovascular risk, i.e. primary or secondary prevention trials, b. Indirectness was considered very serious if cumulative evidence was derived from trials assessing interventions in participants with wide variety of indications i.e. non cardiovascular diseases and cardiovascular diseases, c. Serious imprecision was considered if the 95% confidence intervals overlaps with the minimally important difference for clinical benefit (RR<0.95) or harm (RR>1.05). Very serious imprecision was considered if the 95% confidence intervals include both clinically important benefit (RR<0.95) and harm (RR>1.05).

**n. Antioxidant Compared to Control for Mortality and Cardiovascular Outcomes**

| Certainty assessment            |                   |              |               |                             |                           |                      | Effect                           | Certainty        |
|---------------------------------|-------------------|--------------|---------------|-----------------------------|---------------------------|----------------------|----------------------------------|------------------|
| No of studies                   | Study design      | Risk of bias | Inconsistency | Indirectness                | Imprecision               | Other considerations | Relative (95% CI)                |                  |
| <b>All-cause mortality</b>      |                   |              |               |                             |                           |                      |                                  |                  |
| 21                              | randomised trials | not serious  | not serious   | very serious <sup>a,b</sup> | very serious <sup>c</sup> | none                 | <b>RR 1.06</b><br>(0.99 to 1.12) | ⊕○○○<br>VERY LOW |
| <b>Cardiovascular mortality</b> |                   |              |               |                             |                           |                      |                                  |                  |
| 7                               | randomised trials | not serious  | not serious   | serious <sup>a</sup>        | very serious <sup>c</sup> | none                 | <b>RR 1.02</b><br>(0.92 to 1.12) | ⊕○○○<br>VERY LOW |
| <b>MI</b>                       |                   |              |               |                             |                           |                      |                                  |                  |
| 6                               | randomised trials | not serious  | not serious   | serious <sup>a</sup>        | very serious <sup>c</sup> | none                 | <b>RR 0.98</b><br>(0.87 to 1.11) | ⊕○○○<br>VERY LOW |
| <b>Stroke</b>                   |                   |              |               |                             |                           |                      |                                  |                  |
| 7                               | randomised trials | not serious  | not serious   | serious <sup>a</sup>        | very serious <sup>c</sup> | none                 | <b>RR 1.00</b><br>(0.94 to 1.07) | ⊕○○○<br>VERY LOW |

- a. Indirectness was considered serious if cumulative evidence was derived from trials assessing interventions in participants with varying baseline cardiovascular risk, i.e. primary or secondary prevention trials, b. Indirectness was considered very serious if cumulative evidence was derived from trials assessing interventions in participants with wide variety of indications i.e. non cardiovascular diseases and cardiovascular diseases, c. Serious imprecision was considered if the 95% confidence intervals overlaps with the minimally important difference for clinical benefit (RR<0.95) or harm (RR>1.05). Very serious imprecision was considered if the 95% confidence intervals include both clinically important benefit (RR<0.95) and harm (RR>1.05).

**o. Vitamin D Compared to Control for Mortality and Cardiovascular Outcomes**

| Certainty assessment            |                   |              |                          |                             |                           |                      | Effect                           | Certainty        |
|---------------------------------|-------------------|--------------|--------------------------|-----------------------------|---------------------------|----------------------|----------------------------------|------------------|
| No of studies                   | Study design      | Risk of bias | Inconsistency            | Indirectness                | Imprecision               | Other considerations | Relative (95% CI)                |                  |
| <b>All-cause mortality</b>      |                   |              |                          |                             |                           |                      |                                  |                  |
| 45                              | randomised trials | not serious  | not serious              | very serious <sup>a,b</sup> | not serious <sup>c</sup>  | none <sup>d</sup>    | <b>RR 0.99</b><br>(0.96 to 1.02) | ⊕⊕○○<br>LOW      |
| <b>Cardiovascular mortality</b> |                   |              |                          |                             |                           |                      |                                  |                  |
| 4                               | randomised trials | not serious  | not serious <sup>e</sup> | very serious <sup>a</sup>   | very serious <sup>c</sup> | none                 | <b>RR 1.00</b><br>(0.79 to 1.28) | ⊕○○○<br>VERY LOW |
| <b>MI</b>                       |                   |              |                          |                             |                           |                      |                                  |                  |
| 14                              | randomised trials | not serious  | not serious <sup>e</sup> | very serious <sup>a</sup>   | serious <sup>c</sup>      | none                 | <b>RR 0.95</b><br>(0.88 to 1.03) | ⊕○○○<br>VERY LOW |
| <b>Stroke</b>                   |                   |              |                          |                             |                           |                      |                                  |                  |
| 13                              | randomised trials | not serious  | not serious <sup>e</sup> | very serious <sup>b</sup>   | serious <sup>c</sup>      | none                 | <b>RR 1.06</b><br>(0.95 to 1.19) | ⊕○○○<br>VERY LOW |
| <b>CHD</b>                      |                   |              |                          |                             |                           |                      |                                  |                  |
| 5                               | randomised trials | not serious  | not serious <sup>e</sup> | very serious <sup>a</sup>   | very serious <sup>c</sup> | none                 | <b>RR 0.98</b><br>(0.87 to 1.10) | ⊕○○○<br>VERY LOW |

a. Indirectness was considered serious if cumulative evidence was derived from trials assessing interventions in participants with varying baseline cardiovascular risk, i.e. primary or secondary prevention trials, b. Indirectness was considered very serious if cumulative evidence was derived from trials assessing interventions in participants with wide variety of indications i.e. non cardiovascular diseases and cardiovascular diseases, c. Serious imprecision was considered if the 95% confidence intervals overlaps with the minimally important difference for clinical benefit (RR<0.95) or harm (RR>1.05). Very serious imprecision was considered if the 95% confidence intervals include both clinically important benefit (RR<0.95) and harm (RR>1.05).

p. n-3 LC PUFA Compared to Control for Mortality and Cardiovascular Outcomes

| Certainty assessment            |                   |              |                          |                        |                      |                                                  | Effect                           | Certainty        |
|---------------------------------|-------------------|--------------|--------------------------|------------------------|----------------------|--------------------------------------------------|----------------------------------|------------------|
| No of studies                   | Study design      | Risk of bias | Inconsistency            | Indirectness           | Imprecision          | Other considerations                             | Relative (95% CI)                |                  |
| <b>All-cause mortality</b>      |                   |              |                          |                        |                      |                                                  |                                  |                  |
| 41                              | randomised trials | not serious  | not serious              | serious <sup>a,b</sup> | serious <sup>c</sup> | publication bias strongly suspected <sup>d</sup> | <b>RR 0.98</b><br>(0.93 to 1.02) | ⊕○○○<br>VERY LOW |
| <b>Cardiovascular mortality</b> |                   |              |                          |                        |                      |                                                  |                                  |                  |
| 27                              | randomised trials | not serious  | not serious <sup>e</sup> | serious <sup>a</sup>   | serious <sup>c</sup> | none                                             | <b>RR 0.93</b><br>(0.86 to 1.01) | ⊕⊕○○<br>LOW      |
| <b>MI</b>                       |                   |              |                          |                        |                      |                                                  |                                  |                  |
| 25                              | randomised trials | not serious  | not serious <sup>e</sup> | serious <sup>a</sup>   | serious <sup>c</sup> | none                                             | <b>RR 0.92</b><br>(0.85 to 0.99) | ⊕⊕○○<br>LOW      |
| <b>Stroke</b>                   |                   |              |                          |                        |                      |                                                  |                                  |                  |
| 30                              | randomised trials | not serious  | not serious              | serious <sup>a</sup>   | serious <sup>c</sup> | none                                             | <b>RR 1.05</b><br>(0.97 to 1.13) | ⊕⊕○○<br>LOW      |
| <b>CHD</b>                      |                   |              |                          |                        |                      |                                                  |                                  |                  |
| 30                              | randomised trials | not serious  | not serious              | serious <sup>a</sup>   | serious <sup>c</sup> | none                                             | <b>RR 0.93</b><br>(0.89 to 0.98) | ⊕⊕○○<br>LOW      |

- a. Indirectness was considered serious if cumulative evidence was derived from trials assessing interventions in participants with varying baseline cardiovascular risk, i.e. primary or secondary prevention trials, b. Indirectness was considered very serious if cumulative evidence was derived from trials assessing interventions in participants with wide variety of indications i.e. non cardiovascular diseases and cardiovascular diseases, c. Serious imprecision was considered if the 95% confidence intervals overlaps with the minimally important difference for clinical benefit (RR<0.95) or harm (RR>1.05). Very serious imprecision was considered if the 95% confidence intervals include both clinically important benefit (RR<0.95) and harm (RR>1.05).

q. Modified Dietary Fat Compared to Control for Mortality and Cardiovascular Outcomes

| Certainty assessment            |                   |              |                           |                        |                           |                      | Effect                           | Certainty        |
|---------------------------------|-------------------|--------------|---------------------------|------------------------|---------------------------|----------------------|----------------------------------|------------------|
| No of studies                   | Study design      | Risk of bias | Inconsistency             | Indirectness           | Imprecision               | Other considerations | Relative (95% CI)                |                  |
| <b>All-cause mortality</b>      |                   |              |                           |                        |                           |                      |                                  |                  |
| 8                               | randomised trials | not serious  | very serious <sup>a</sup> | serious <sup>b,c</sup> | serious <sup>d</sup>      | none <sup>e</sup>    | <b>RR 1.02</b><br>(0.83 to 1.25) | ⊕○○○<br>VERY LOW |
| <b>Cardiovascular mortality</b> |                   |              |                           |                        |                           |                      |                                  |                  |
| 6                               | randomised trials | not serious  | serious <sup>a</sup>      | serious <sup>b</sup>   | very serious <sup>d</sup> | none                 | <b>RR 0.92</b><br>(0.68 to 1.25) | ⊕○○○<br>VERY LOW |
| <b>MI</b>                       |                   |              |                           |                        |                           |                      |                                  |                  |
| 9                               | randomised trials | not serious  | serious <sup>a</sup>      | serious <sup>b</sup>   | very serious <sup>d</sup> | none <sup>e</sup>    | <b>RR 0.92</b><br>(0.66 to 1.28) | ⊕○○○<br>VERY LOW |
| <b>Stroke</b>                   |                   |              |                           |                        |                           |                      |                                  |                  |
| 4                               | randomised trials | not serious  | not serious <sup>a</sup>  | serious <sup>c</sup>   | very serious <sup>d</sup> | none <sup>e</sup>    | <b>RR 0.70</b><br>(0.24 to 2.07) | ⊕○○○<br>VERY LOW |
| <b>CHD</b>                      |                   |              |                           |                        |                           |                      |                                  |                  |
| 9                               | randomised trials | not serious  | very serious <sup>a</sup> | serious <sup>b</sup>   | very serious <sup>d</sup> | none                 | <b>RR 0.81</b><br>(0.58 to 1.14) | ⊕○○○<br>VERY LOW |

a. Indirectness was considered serious if cumulative evidence was derived from trials assessing interventions in participants with varying baseline cardiovascular risk, i.e. primary or secondary prevention trials, b. Indirectness was considered very serious if cumulative evidence was derived from trials assessing interventions in participants with wide variety of indications i.e. non cardiovascular diseases and cardiovascular diseases, c. Serious imprecision was considered if the 95% confidence intervals overlaps with the minimally important difference for clinical benefit (RR<0.95) or harm (RR>1.05). Very serious imprecision was considered if the 95% confidence intervals include both clinically important benefit (RR<0.95) and harm (RR>1.05).

**r. Reduced Salt Intake in Normotensive Patients Compared to Control for Mortality and Cardiovascular Outcomes**

| Certainty assessment       |                   |              |                          |                            |                           |                      | Effect                           | Certainty        |
|----------------------------|-------------------|--------------|--------------------------|----------------------------|---------------------------|----------------------|----------------------------------|------------------|
| No of studies              | Study design      | Risk of bias | Inconsistency            | Indirectness               | Imprecision               | Other considerations | Relative (95% CI)                |                  |
| <b>All-cause mortality</b> |                   |              |                          |                            |                           |                      |                                  |                  |
| 3                          | randomised trials | not serious  | not serious <sup>a</sup> | not serious <sup>b,c</sup> | serious <sup>d</sup>      | none <sup>e</sup>    | <b>RR 0.90</b><br>(0.85 to 0.95) | ⊕⊕⊕○<br>MODERATE |
| <b>CHD</b>                 |                   |              |                          |                            |                           |                      |                                  |                  |
| 4                          | randomised trials | not serious  | not serious <sup>a</sup> | not serious <sup>b</sup>   | very serious <sup>d</sup> | none                 | <b>RR 0.97</b><br>(0.80 to 1.18) | ⊕⊕○○<br>LOW      |

- a. Indirectness was considered serious if cumulative evidence was derived from trials assessing interventions in participants with varying baseline cardiovascular risk, i.e. primary or secondary prevention trials, b. Indirectness was considered very serious if cumulative evidence was derived from trials assessing interventions in participants with wide variety of indications i.e. non cardiovascular diseases and cardiovascular diseases, c. Serious imprecision was considered if the 95% confidence intervals overlaps with the minimally important difference for clinical benefit (RR<0.95) or harm (RR>1.05). Very serious imprecision was considered if the 95% confidence intervals include both clinically important benefit (RR<0.95) and harm (RR>1.05).

s. Reduced Salt Intake in Hypertensive Patients Compared to Control for Mortality and Cardiovascular Outcomes

| Certainty assessment            |                   |              |                          |                            |                           |                      | Effect                           | Certainty        |
|---------------------------------|-------------------|--------------|--------------------------|----------------------------|---------------------------|----------------------|----------------------------------|------------------|
| No of studies                   | Study design      | Risk of bias | Inconsistency            | Indirectness               | Imprecision               | Other considerations | Relative (95% CI)                |                  |
| <b>All-cause mortality</b>      |                   |              |                          |                            |                           |                      |                                  |                  |
| 5                               | randomised trials | not serious  | not serious <sup>a</sup> | not serious <sup>b,c</sup> | very serious <sup>d</sup> | none <sup>e</sup>    | <b>RR 0.99</b><br>(0.92 to 1.07) | ⊕⊕○○<br>LOW      |
| <b>Cardiovascular mortality</b> |                   |              |                          |                            |                           |                      |                                  |                  |
| 3                               | randomised trials | not serious  | not serious <sup>a</sup> | not serious <sup>b</sup>   | serious <sup>d</sup>      | none                 | <b>RR 0.67</b><br>(0.46 to 0.99) | ⊕⊕⊕○<br>MODERATE |
| <b>CHD</b>                      |                   |              |                          |                            |                           |                      |                                  |                  |
| 5                               | randomised trials | not serious  | not serious <sup>a</sup> | not serious <sup>b</sup>   | very serious <sup>d</sup> | none                 | <b>RR 0.95</b><br>(0.66 to 1.38) | ⊕⊕○○<br>LOW      |

- a. Indirectness was considered serious if cumulative evidence was derived from trials assessing interventions in participants with varying baseline cardiovascular risk, i.e. primary or secondary prevention trials, b. Indirectness was considered very serious if cumulative evidence was derived from trials assessing interventions in participants with wide variety of indications i.e. non cardiovascular diseases and cardiovascular diseases, c. Serious imprecision was considered if the 95% confidence intervals overlaps with the minimally important difference for clinical benefit (RR<0.95) or harm (RR>1.05). Very serious imprecision was considered if the 95% confidence intervals include both clinically important benefit (RR<0.95) and harm (RR>1.05).



t. Reduced Saturated Fat Compared to Control for Mortality and Cardiovascular Outcomes

| Certainty assessment            |                   |              |                           |                        |                           |                                                  | Effect                           | Certainty        |
|---------------------------------|-------------------|--------------|---------------------------|------------------------|---------------------------|--------------------------------------------------|----------------------------------|------------------|
| No of studies                   | Study design      | Risk of bias | Inconsistency             | Indirectness           | Imprecision               | Other considerations                             | Relative (95% CI)                |                  |
| <b>All-cause mortality</b>      |                   |              |                           |                        |                           |                                                  |                                  |                  |
| 10                              | randomised trials | not serious  | not serious <sup>a</sup>  | serious <sup>b,c</sup> | very serious <sup>d</sup> | publication bias strongly suspected <sup>e</sup> | <b>RR 0.97</b><br>(0.88 to 1.07) | ⊕○○○<br>VERY LOW |
| <b>Cardiovascular mortality</b> |                   |              |                           |                        |                           |                                                  |                                  |                  |
| 12                              | randomised trials | not serious  | serious <sup>a</sup>      | serious <sup>b</sup>   | very serious <sup>d</sup> | none                                             | <b>RR 0.95</b><br>(0.78 to 1.15) | ⊕○○○<br>VERY LOW |
| <b>MI</b>                       |                   |              |                           |                        |                           |                                                  |                                  |                  |
| 10                              | randomised trials | not serious  | not serious <sup>a</sup>  | serious <sup>b</sup>   | serious <sup>d</sup>      | none <sup>e</sup>                                | <b>RR 0.90</b><br>(0.80 to 1.01) | ⊕⊕○○<br>LOW      |
| <b>Stroke</b>                   |                   |              |                           |                        |                           |                                                  |                                  |                  |
| 7                               | randomised trials | not serious  | not serious <sup>a</sup>  | serious <sup>c</sup>   | very serious <sup>d</sup> | none <sup>e</sup>                                | <b>RR 1.00</b><br>(0.89 to 1.12) | ⊕○○○<br>VERY LOW |
| <b>CHD</b>                      |                   |              |                           |                        |                           |                                                  |                                  |                  |
| 8                               | randomised trials | not serious  | very serious <sup>a</sup> | serious <sup>b</sup>   | serious <sup>d</sup>      | none                                             | <b>RR 0.87</b><br>(0.74 to 1.03) | ⊕○○○<br>VERY LOW |

a. Indirectness was considered serious if cumulative evidence was derived from trials assessing interventions in participants with varying baseline cardiovascular risk, i.e. primary or secondary prevention trials, b. Indirectness was considered very serious if cumulative evidence was derived from trials assessing interventions in participants with wide variety of indications i.e. non cardiovascular diseases and cardiovascular diseases, c. Serious imprecision was considered if the 95% confidence intervals overlaps with the minimally important difference for clinical benefit (RR<0.95) or harm (RR>1.05). Very serious imprecision was considered if the 95% confidence intervals include both clinically important benefit (RR<0.95) and harm (RR>1.05).

**u. Mediterranean Diet Compared to Control for Mortality and Cardiovascular Outcomes**

| Certainty assessment            |                   |              |                           |                            |                           |                      | Effect                           | Certainty        |
|---------------------------------|-------------------|--------------|---------------------------|----------------------------|---------------------------|----------------------|----------------------------------|------------------|
| No of studies                   | Study design      | Risk of bias | Inconsistency             | Indirectness               | Imprecision               | Other considerations | Relative (95% CI)                |                  |
| <b>All-cause mortality</b>      |                   |              |                           |                            |                           |                      |                                  |                  |
| 5                               | randomised trials | not serious  | very serious <sup>a</sup> | not serious <sup>b,c</sup> | very serious <sup>d</sup> | none <sup>e</sup>    | <b>RR 0.81</b><br>(0.45 to 1.47) | ⊕○○○<br>VERY LOW |
| <b>Cardiovascular mortality</b> |                   |              |                           |                            |                           |                      |                                  |                  |
| 4                               | randomised trials | not serious  | very serious <sup>a</sup> | not serious <sup>b</sup>   | very serious <sup>d</sup> | none                 | <b>RR 0.68</b><br>(0.21 to 2.19) | ⊕○○○<br>VERY LOW |
| <b>MI</b>                       |                   |              |                           |                            |                           |                      |                                  |                  |
| 3                               | randomised trials | not serious  | very serious <sup>a</sup> | not serious <sup>b</sup>   | very serious <sup>d</sup> | none <sup>e</sup>    | <b>RR 0.49</b><br>(0.12 to 1.95) | ⊕○○○<br>VERY LOW |
| <b>Stroke</b>                   |                   |              |                           |                            |                           |                      |                                  |                  |
| 3                               | randomised trials | not serious  | not serious <sup>a</sup>  | not serious <sup>c</sup>   | very serious <sup>d</sup> | none <sup>e</sup>    | <b>RR 0.65</b><br>(0.39 to 1.11) | ⊕⊕○○<br>LOW      |
| <b>CHD</b>                      |                   |              |                           |                            |                           |                      |                                  |                  |
| 3                               | randomised trials | not serious  | very serious <sup>a</sup> | not serious <sup>b</sup>   | very serious <sup>d</sup> | none                 | <b>RR 0.59</b><br>(0.18 to 1.98) | ⊕○○○<br>VERY LOW |

a. Indirectness was considered serious if cumulative evidence was derived from trials assessing interventions in participants with varying baseline cardiovascular risk, i.e. primary or secondary prevention trials, b. Indirectness was considered very serious if cumulative evidence was derived from trials assessing interventions in participants with wide variety of indications i.e. non cardiovascular diseases and cardiovascular diseases, c. Serious imprecision was considered if the 95% confidence intervals overlaps with the minimally important difference for clinical benefit (RR<0.95) or harm (RR>1.05). Very serious imprecision was considered if the 95% confidence intervals include both clinically important benefit (RR<0.95) and harm (RR>1.05).

v. Reduced Dietary Fat Compared to Control for Mortality and Cardiovascular Outcomes

| Certainty assessment            |                   |              |                          |                        |                           |                      | Effect                           | Certainty        |
|---------------------------------|-------------------|--------------|--------------------------|------------------------|---------------------------|----------------------|----------------------------------|------------------|
| No of studies                   | Study design      | Risk of bias | Inconsistency            | Indirectness           | Imprecision               | Other considerations | Relative (95% CI)                |                  |
| <b>All-cause mortality</b>      |                   |              |                          |                        |                           |                      |                                  |                  |
| 10                              | randomised trials | not serious  | not serious <sup>a</sup> | serious <sup>b,c</sup> | serious <sup>d</sup>      | none <sup>e</sup>    | <b>RR 0.97</b><br>(0.92 to 1.02) | ⊕⊕○○<br>LOW      |
| <b>Cardiovascular mortality</b> |                   |              |                          |                        |                           |                      |                                  |                  |
| 7                               | randomised trials | not serious  | not serious <sup>a</sup> | serious <sup>b</sup>   | very serious <sup>d</sup> | none                 | <b>RR 0.96</b><br>(0.82 to 1.14) | ⊕○○○<br>VERY LOW |
| <b>MI</b>                       |                   |              |                          |                        |                           |                      |                                  |                  |
| 6                               | randomised trials | not serious  | not serious <sup>a</sup> | serious <sup>b</sup>   | very serious <sup>d</sup> | none <sup>e</sup>    | <b>RR 0.97</b><br>(0.87 to 1.07) | ⊕○○○<br>VERY LOW |
| <b>Stroke</b>                   |                   |              |                          |                        |                           |                      |                                  |                  |
| 4                               | randomised trials | not serious  | not serious <sup>a</sup> | serious <sup>c</sup>   | very serious <sup>d</sup> | none <sup>e</sup>    | <b>RR 1.01</b><br>(0.86 to 1.19) | ⊕○○○<br>VERY LOW |
| <b>CHD</b>                      |                   |              |                          |                        |                           |                      |                                  |                  |
| 8                               | randomised trials | not serious  | not serious <sup>a</sup> | serious <sup>b</sup>   | very serious <sup>d</sup> | none                 | <b>RR 0.97</b><br>(0.85 to 1.11) | ⊕○○○<br>VERY LOW |

a. Indirectness was considered serious if cumulative evidence was derived from trials assessing interventions in participants with varying baseline cardiovascular risk, i.e. primary or secondary prevention trials, b. Indirectness was considered very serious if cumulative evidence was derived from trials assessing interventions in participants with wide variety of indications i.e. non cardiovascular diseases and cardiovascular diseases, c. Serious imprecision was considered if the 95% confidence intervals overlaps with the minimally important difference for clinical benefit (RR<0.95) or harm (RR>1.05). Very serious imprecision was considered if the 95% confidence intervals include both clinically important benefit (RR<0.95) and harm (RR>1.05).

w. n-6 PUFA Compared to Control for Mortality and Cardiovascular Outcomes

| Certainty assessment            |                   |              |                           |                        |                           |                      | Effect                           | Certainty        |
|---------------------------------|-------------------|--------------|---------------------------|------------------------|---------------------------|----------------------|----------------------------------|------------------|
| No of studies                   | Study design      | Risk of bias | Inconsistency             | Indirectness           | Imprecision               | Other considerations | Relative (95% CI)                |                  |
| <b>All-cause mortality</b>      |                   |              |                           |                        |                           |                      |                                  |                  |
| 10                              | randomised trials | not serious  | not serious <sup>a</sup>  | serious <sup>b,c</sup> | very serious <sup>d</sup> | none <sup>e</sup>    | <b>RR 1.00</b><br>(0.88 to 1.13) | ⊕○○○<br>VERY LOW |
| <b>Cardiovascular mortality</b> |                   |              |                           |                        |                           |                      |                                  |                  |
| 7                               | randomised trials | not serious  | very serious <sup>a</sup> | serious <sup>b</sup>   | very serious <sup>d</sup> | none                 | <b>RR 1.09</b><br>(0.68 to 1.75) | ⊕○○○<br>VERY LOW |
| <b>MI</b>                       |                   |              |                           |                        |                           |                      |                                  |                  |
| 7                               | randomised trials | not serious  | serious <sup>a</sup>      | serious <sup>b</sup>   | serious <sup>d</sup>      | none <sup>e</sup>    | <b>RR 0.88</b><br>(0.75 to 1.03) | ⊕○○○<br>VERY LOW |
| <b>Stroke</b>                   |                   |              |                           |                        |                           |                      |                                  |                  |
| 4                               | randomised trials | not serious  | very serious <sup>a</sup> | serious <sup>c</sup>   | very serious <sup>d</sup> | none <sup>e</sup>    | <b>RR 1.27</b><br>(0.28 to 5.87) | ⊕○○○<br>VERY LOW |
| <b>CHD</b>                      |                   |              |                           |                        |                           |                      |                                  |                  |
| 7                               | randomised trials | not serious  | very serious <sup>a</sup> | serious <sup>b</sup>   | very serious <sup>d</sup> | none                 | <b>RR 0.86</b><br>(0.50 to 1.46) | ⊕○○○<br>VERY LOW |

a. Indirectness was considered serious if cumulative evidence was derived from trials assessing interventions in participants with varying baseline cardiovascular risk, i.e. primary or secondary prevention trials, b. Indirectness was considered very serious if cumulative evidence was derived from trials assessing interventions in participants with wide variety of indications i.e. non cardiovascular diseases and cardiovascular diseases, c. Serious imprecision was considered if the 95% confidence intervals overlaps with the minimally important difference for clinical benefit (RR<0.95) or harm (RR>1.05). Very serious imprecision was considered if the 95% confidence intervals include both clinically important benefit (RR<0.95) and harm (RR>1.05).

x. n-3 (ALA) PUFA Compared to Control for Mortality and Cardiovascular Outcomes

| Certainty assessment            |                   |              |                          |                        |                           |                      | Effect                           | Certainty        |
|---------------------------------|-------------------|--------------|--------------------------|------------------------|---------------------------|----------------------|----------------------------------|------------------|
| No of studies                   | Study design      | Risk of bias | Inconsistency            | Indirectness           | Imprecision               | Other considerations | Relative (95% CI)                |                  |
| <b>All-cause mortality</b>      |                   |              |                          |                        |                           |                      |                                  |                  |
| 5                               | randomised trials | not serious  | not serious <sup>a</sup> | serious <sup>b,c</sup> | very serious <sup>d</sup> | none <sup>e</sup>    | <b>RR 1.01</b><br>(0.82 to 1.23) | ⊕○○○<br>VERY LOW |
| <b>Cardiovascular mortality</b> |                   |              |                          |                        |                           |                      |                                  |                  |
| 4                               | randomised trials | not serious  | not serious <sup>a</sup> | serious <sup>b</sup>   | very serious <sup>d</sup> | none                 | <b>RR 0.96</b><br>(0.80 to 1.15) | ⊕○○○<br>VERY LOW |
| <b>MI</b>                       |                   |              |                          |                        |                           |                      |                                  |                  |
| 3                               | randomised trials | not serious  | serious <sup>a</sup>     | serious <sup>b</sup>   | very serious <sup>d</sup> | none <sup>e</sup>    | <b>RR 1.00</b><br>(0.53 to 1.87) | ⊕○○○<br>VERY LOW |
| <b>Stroke</b>                   |                   |              |                          |                        |                           |                      |                                  |                  |
| 5                               | randomised trials | not serious  | not serious <sup>a</sup> | serious <sup>c</sup>   | very serious <sup>d</sup> | none <sup>e</sup>    | <b>RR 1.15</b><br>(0.66 to 1.99) | ⊕○○○<br>VERY LOW |
| <b>CHD</b>                      |                   |              |                          |                        |                           |                      |                                  |                  |
| 4                               | randomised trials | not serious  | not serious <sup>a</sup> | serious <sup>b</sup>   | very serious <sup>d</sup> | none                 | <b>RR 1.00</b><br>(0.72 to 1.37) | ⊕○○○<br>VERY LOW |

a. Indirectness was considered serious if cumulative evidence was derived from trials assessing interventions in participants with varying baseline cardiovascular risk, i.e. primary or secondary prevention trials, b. Indirectness was considered very serious if cumulative evidence was derived from trials assessing interventions in participants with wide variety of indications i.e. non cardiovascular diseases and cardiovascular diseases, c. Serious imprecision was considered if the 95% confidence intervals overlaps with the minimally important difference for clinical benefit (RR<0.95) or harm (RR>1.05). Very serious imprecision was considered if the 95% confidence intervals include both clinically important benefit (RR<0.95) and harm (RR>1.05).



**Supplement Table 6. Characteristics of the Included Interventions Extracted From Selected Systematic Reviews**

| Intervention                                 | Trials | No. Of Participants | Age (years) | Women (%) | Hypertension (%) | Diabetes (%) | CAD (%) | Follow-up (months) |
|----------------------------------------------|--------|---------------------|-------------|-----------|------------------|--------------|---------|--------------------|
| Vitamin E                                    | 35     | 137,179             | 18-90       | NR        | NR               | NR           | NR      | 6-125              |
| Vitamin C                                    | 4      | 16,004              | 18-69       | NR        | NR               | NR           | NR      | 15-125             |
| Vitamin B Complex                            | 16     | 45,424              | 18-89       | NR        | NR               | NR           | NR      | 6-88               |
| Vitamin B6                                   | 2      | 3,429               | NR          | NR        | NR               | NR           | NR      | 38.4-39.6          |
| Vitamin B3/ Niacin                           | 8      | 34,543              | 18-80       | NR        | NR               | NR           | NR      | 6-74               |
| Vitamin A                                    | 1      | 2,297               | 45-74       | NR        | NR               | NR           | NR      | 36-48              |
| Selenium                                     | 5      | 19,454              | 26-75       | NR        | NR               | NR           | NR      | 6-91               |
| Multivitamins                                | 10     | 22,869              | 40-85       | NR        | NR               | NR           | NR      | 12-134             |
| Iron                                         | 2      | 762                 | NR          | NR        | NR               | NR           | NR      | NR                 |
| Folic acid                                   | 12     | 28,483              | 18-79       | NR        | NR               | NR           | NR      | 12-120             |
| Calcium                                      | 6      | 9,765               | 60-97       | NR        | NR               | NR           | NR      | 24-96              |
| Calcium + Vitamin D                          | 20     | 42,072              | 33-103      | NR        | NR               | NR           | NR      | 6-86               |
| β-carotene                                   | 8      | 63,946              | 20-84       | NR        | NR               | NR           | NR      | 25-144             |
| Antioxidants                                 | 24     | 73,262              | 18-80       | NR        | NR               | NR           | NR      | 6-125              |
| Vitamin D                                    | 50     | 69,503              | 18-104      | NR        | NR               | NR           | NR      | 6-66               |
| n 3 LC PUFA                                  | 51     | 135,663             | 61.4        | 63.2      | 47.0             | 35-100       | 17.7    | 28.6               |
| Modified dietary fat                         | 12     | 12,313              | 49.4        | 23        | NR               | 0-100        | 0-100   | 20.3               |
| *Reduced salt (hypertensives/ normotensives) | 10     | 35,945              | 55.8        | 43.5      | 55.5             | NR           | NR      | 38.9               |
| Reduced saturated fat                        | 15     | 56,195              | 48.8        | 65.08     | NR               | 0-100        | 0-100   | 26.1               |
| Mediterranean diet                           | 5      | 10,671              | 54          | 33.3      | 66.6             | 39.4         | 10.8    | 25.4               |
| Reduced dietary fat                          | 12     | 60,642              | 48.9        | 94.6      | NR               | 0-100        | 0-100   | 25                 |
| n-6 PUFA                                     | 13     | 5,786               | 51.9        | 32.32     | 10.3             | 4.3          | 54.2    | 24.2               |
| n- 3 (ALA) PUFA                              | 5      | 19,483              | 62.6        | 46        | 3.0              | NR           | 12.5    | 20.6               |

Values are given as ranges, median or mean which ever was available. NR = Not Reported, \* represents both (hypertensives and normotensive groups), LC (long chain), n-3 (omega 3), n-6 (omega 6), PUFA (Polyunsaturated fatty acid)

**Supplement Table 7. Eggers' Regression Test and Degree of Heterogeneity**

| <b>Outcome</b>             | <b>Intervention</b>          | <b>Egger's P-value</b> | <b>I<sup>2</sup></b> |
|----------------------------|------------------------------|------------------------|----------------------|
| All-cause mortality        | Vitamin E                    | 0.31                   | 0%                   |
|                            | Vitamin C                    | ND                     | 0%                   |
|                            | Vitamin B-Complex            | 0.46                   | 0%                   |
|                            | Vitamin B6                   | ND                     | 0%                   |
|                            | Vitamin B3/Niacin            | ND                     | 0%                   |
|                            | Vitamin A                    | ND                     | NA                   |
|                            | Selenium                     | ND                     | 0%                   |
|                            | Multivitamins                | 0.51                   | 0%                   |
|                            | Iron                         | ND                     | 0%                   |
|                            | Folic acid                   | 0.31                   | 17%                  |
|                            | Calcium                      | ND                     | 0%                   |
|                            | Calcium +Vitamin D           | 0.33                   | 0%                   |
|                            | Beta carotene                | ND                     | 10%                  |
|                            | Antioxidant                  | 0.21                   | 17%                  |
|                            | Vitamin D                    | 0.72                   | 0%                   |
|                            | n-3 (LC) PUFA                | 0.09                   | 8.5%                 |
|                            | Modified fat intake          | ND                     | 34%                  |
|                            | Reduced salt (normotensive)  | ND                     | 0%                   |
|                            | Reduced salt (hypertensive)  | ND                     | 0%                   |
|                            | Reduced saturated fat intake | 0.02                   | 3%                   |
| Mediterranean diet         | ND                           | 68%                    |                      |
| Reduced dietary fat intake | ND                           | 0%                     |                      |
| n-6 PUFA                   | 0.76                         | 0%                     |                      |
| n-3 (ALA) PUFA             | ND                           | 0%                     |                      |
| Cardiovascular mortality   | Vitamin E                    | 0.14                   | 0%                   |
|                            | Vitamin C                    | ND                     | 0%                   |
|                            | Vitamin B-Complex            | ND                     | 52%                  |
|                            | Vitamin B3/Niacin            | ND                     | 0%                   |
|                            | Selenium                     | ND                     | 48%                  |
|                            | Multivitamins                | ND                     | 0%                   |



|    |                             |      |     |
|----|-----------------------------|------|-----|
|    | Iron                        | ND   | 0%  |
|    | Folic acid                  | ND   | 0%  |
|    | Calcium                     | ND   | 53% |
|    | Calcium +Vitamin D          | ND   | NA  |
|    | Beta carotene               | ND   | 0%  |
|    | Antioxidant                 | ND   | 0%  |
|    | Vitamin D                   | ND   | 0%  |
|    | N-3 (LC) PUFA               | 0.14 | 23% |
|    | Modified dietary fat        | ND   | 45% |
|    | Reduced salt (hypertensive) | ND   | 0%  |
|    | Reduced saturated fat       | ND   | 30% |
|    | Mediterranean diet          | ND   | 77% |
|    | Reduced dietary fat         | ND   | 0%  |
|    | n-6 PUFA                    | ND   | 61% |
|    | n-3 (ALA) PUFA              | ND   | 0%  |
| MI | Vitamin E                   | 0.01 | 64% |
|    | Vitamin C                   | ND   | 6%  |
|    | Vitamin B-Complex           | 0.92 | 0%  |
|    | Vitamin B6                  | ND   | 0%  |
|    | Vitamin B3/Niacin           | ND   | 38% |
|    | Selenium                    | ND   | 0%  |
|    | Multivitamins               | ND   | 0%  |
|    | Folic acid                  | ND   | 12% |
|    | Calcium                     | ND   | 69% |
|    | Calcium +Vitamin D          | ND   | 0%  |
|    | Beta carotene               | ND   | 0%  |
|    | Antioxidant                 | ND   | 0%  |
|    | Vitamin D                   | 0.75 | 0%  |
|    | n-3 (LC) PUFA               | 0.11 | 1%  |
|    | Modified dietary fat        | ND   | 45% |
|    | Reduced saturated fat       | ND   | 10% |
|    | Mediterranean diet          | ND   | 64% |
|    | Reduced dietary fat         | ND   | 0%  |

|        |                       |      |      |
|--------|-----------------------|------|------|
|        | n-6 PUFA              | ND   | 0%   |
|        | n-3 (ALA) PUFA        | ND   | 26%  |
| Stroke | Vitamin E             | 0.08 | 15%  |
|        | Vitamin C             | ND   | 0%   |
|        | Vitamin B-Complex     | 0.48 | 16%  |
|        | Vitamin B6            | ND   | 0%   |
|        | Vitamin B3/Niacin     | ND   | 60%  |
|        | Selenium              | ND   | 0%   |
|        | Multivitamins         | ND   | 59%  |
|        | Folic acid            | ND   | 0%   |
|        | Calcium               | ND   | 0%   |
|        | Calcium +Vitamin D    | ND   | 0%   |
|        | Beta carotene         | ND   | 36%  |
|        | Antioxidant           | ND   | 0%   |
|        | Vitamin D             | 0.24 | 0%   |
|        | n-3 (LC) PUFA         | 0.15 | 0%   |
|        | Modified dietary fat  | ND   | 8%   |
|        | Reduced saturated fat | ND   | 0%   |
|        | Mediterranean diet    | ND   | 0%   |
|        | Reduced dietary fat   | ND   | 0%   |
|        | n-6 PUFA              | ND   | 56%  |
|        | n-3 (ALA) PUFA        | ND   | 0%   |
| CHD    | Vitamin E             | ND   | 0%   |
|        | Vitamin C             | ND   | NA   |
|        | Vitamin B-Complex     | ND   | 12%  |
|        | Vitamin B3/Niacin     | ND   | 0%   |
|        | Selenium              | ND   | NA   |
|        | Folic acid            | ND   | 0%   |
|        | Calcium               | ND   | 53%  |
|        | Calcium +Vitamin D    | ND   | 49%  |
|        | Beta carotene         | ND   | 0%   |
|        | Vitamin D             | ND   | 0%   |
|        | n-3 (LC) PUFA         | 0.49 | 0.6% |

|  |                             |    |     |
|--|-----------------------------|----|-----|
|  | Modified dietary fat        | ND | 61% |
|  | Reduced salt (normotensive) | ND | 0%  |
|  | Reduced salt (hypertensive) | ND | 0%  |
|  | Reduced saturated fat       | ND | 66% |
|  | Mediterranean diet          | ND | 62% |
|  | Reduced dietary fat         | ND | 17% |
|  | n-6 PUFA                    | ND | 71% |
|  | n-3 (ALA) PUFA              | ND | 2%  |

CHD (Coronary Heart Disease); MI (Myocardial infarction); ND (Not Determined); NA (Not Applicable)

**Supplement Figure 1: Forest plot showing effects of nutritional supplements and dietary interventions on myocardial infarction**

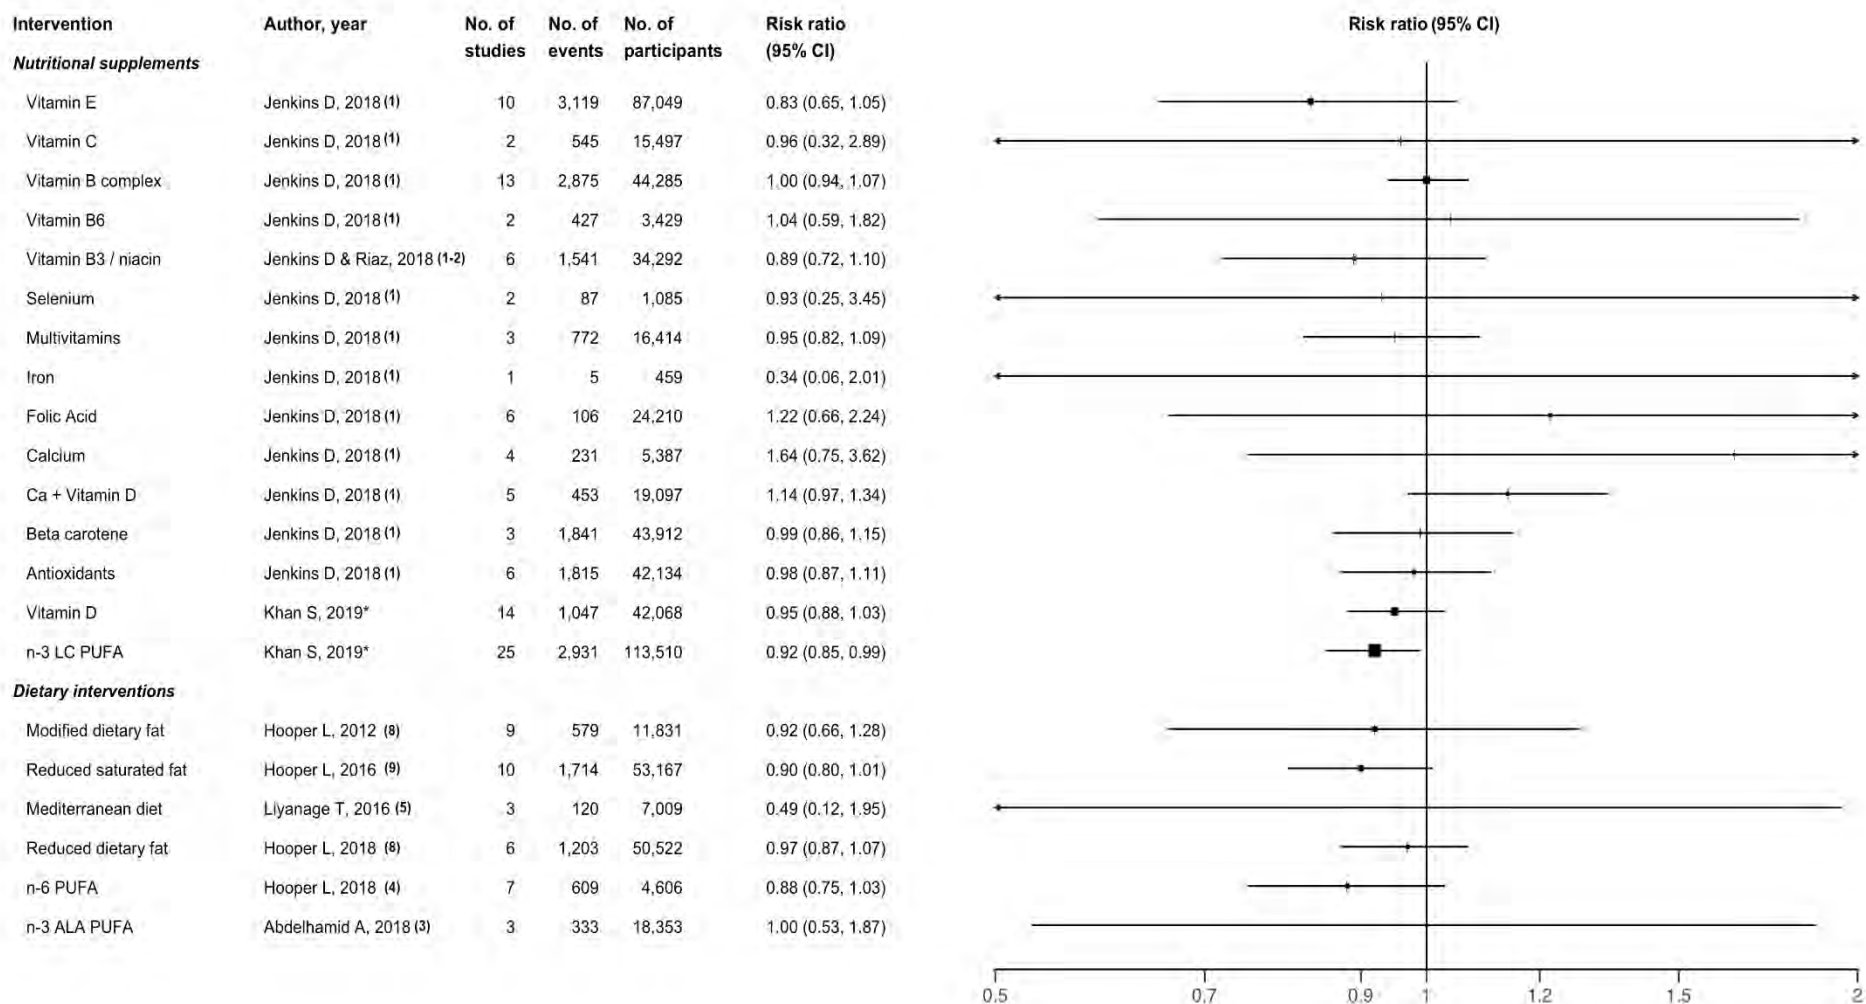

ALA (Alpha Linolenic Acid), Ca (Calcium), LC (Long Chain), n-3 (omega 3), n-6 (omega 6), PUFA (Polyunsaturated Fatty Acid). \* Updated meta-analysis after inclusion of new clinical trials

**Supplement Figure 2: Forest plot showing effects of nutritional supplements and dietary interventions on stroke**

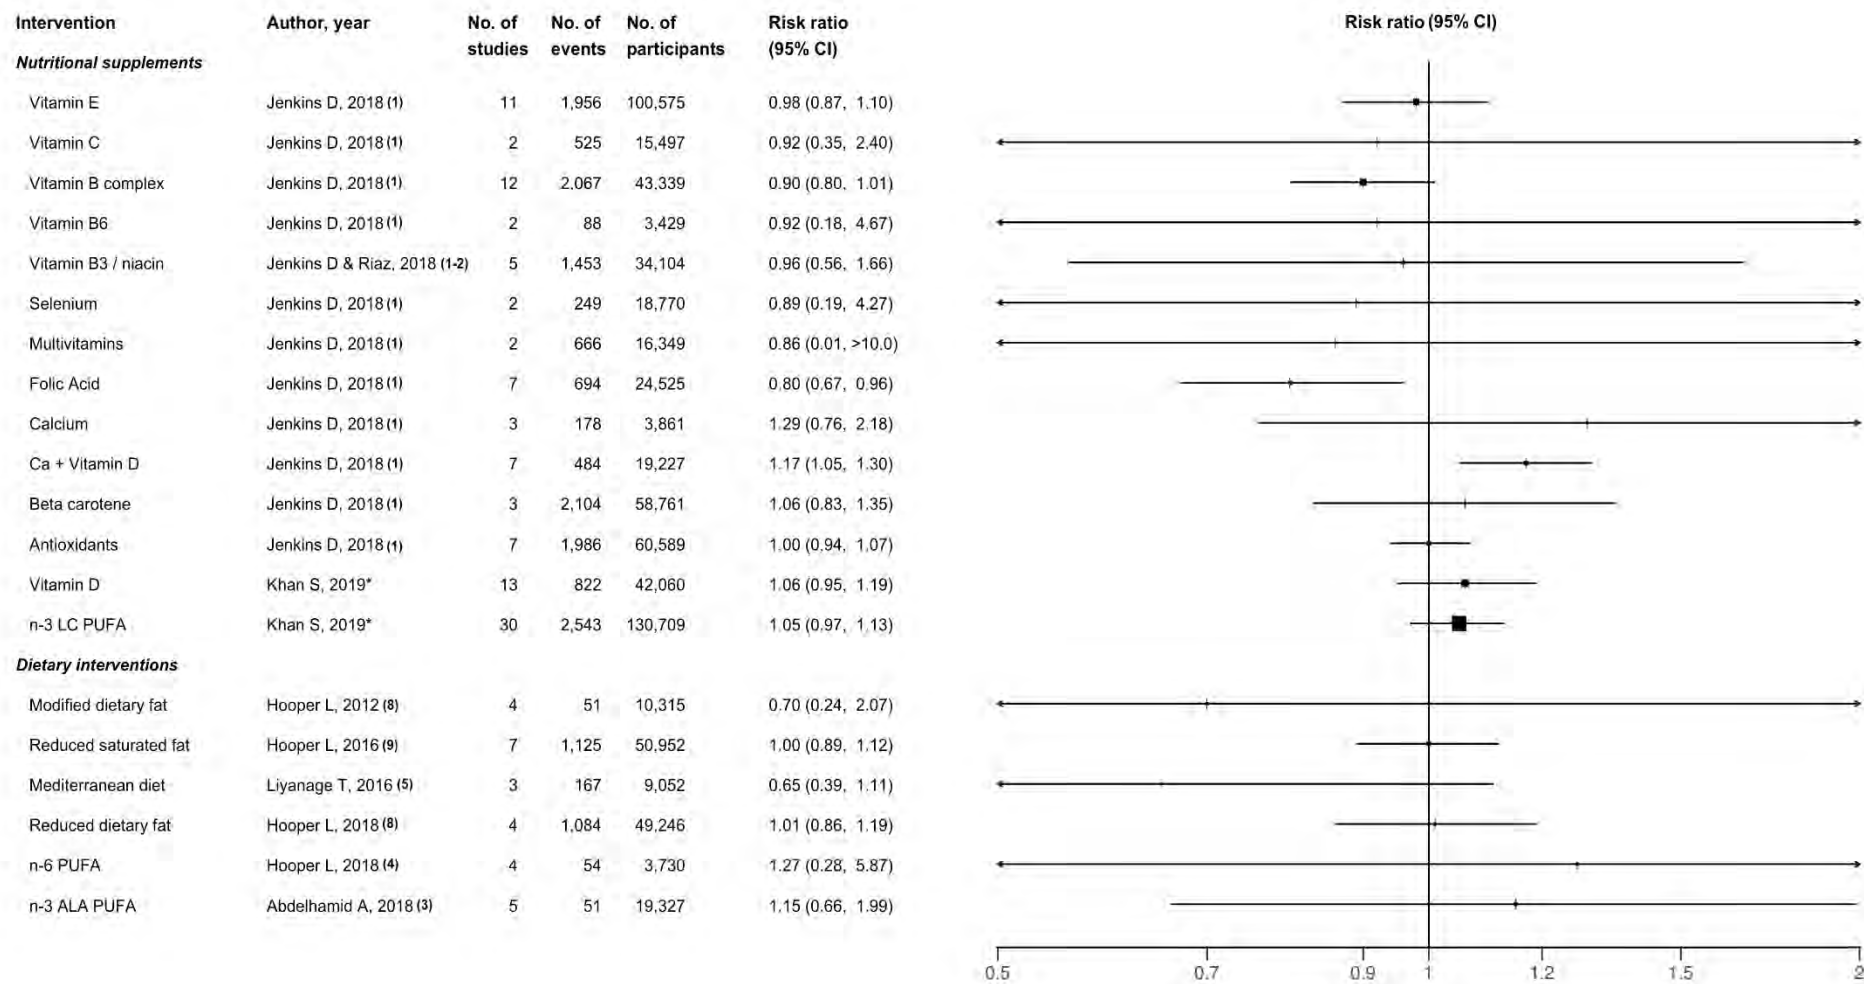

ALA (Alpha Linolenic Acid), Ca (Calcium), LC (Long Chain), n-3 (omega 3), n-6 (omega 6), PUFA (Polyunsaturated Fatty Acid). \* *Updated meta-analysis after inclusion of new clinical trials*

**Supplement Figure 3: Forest plot showing effects of nutritional supplements and dietary interventions on coronary heart disease**

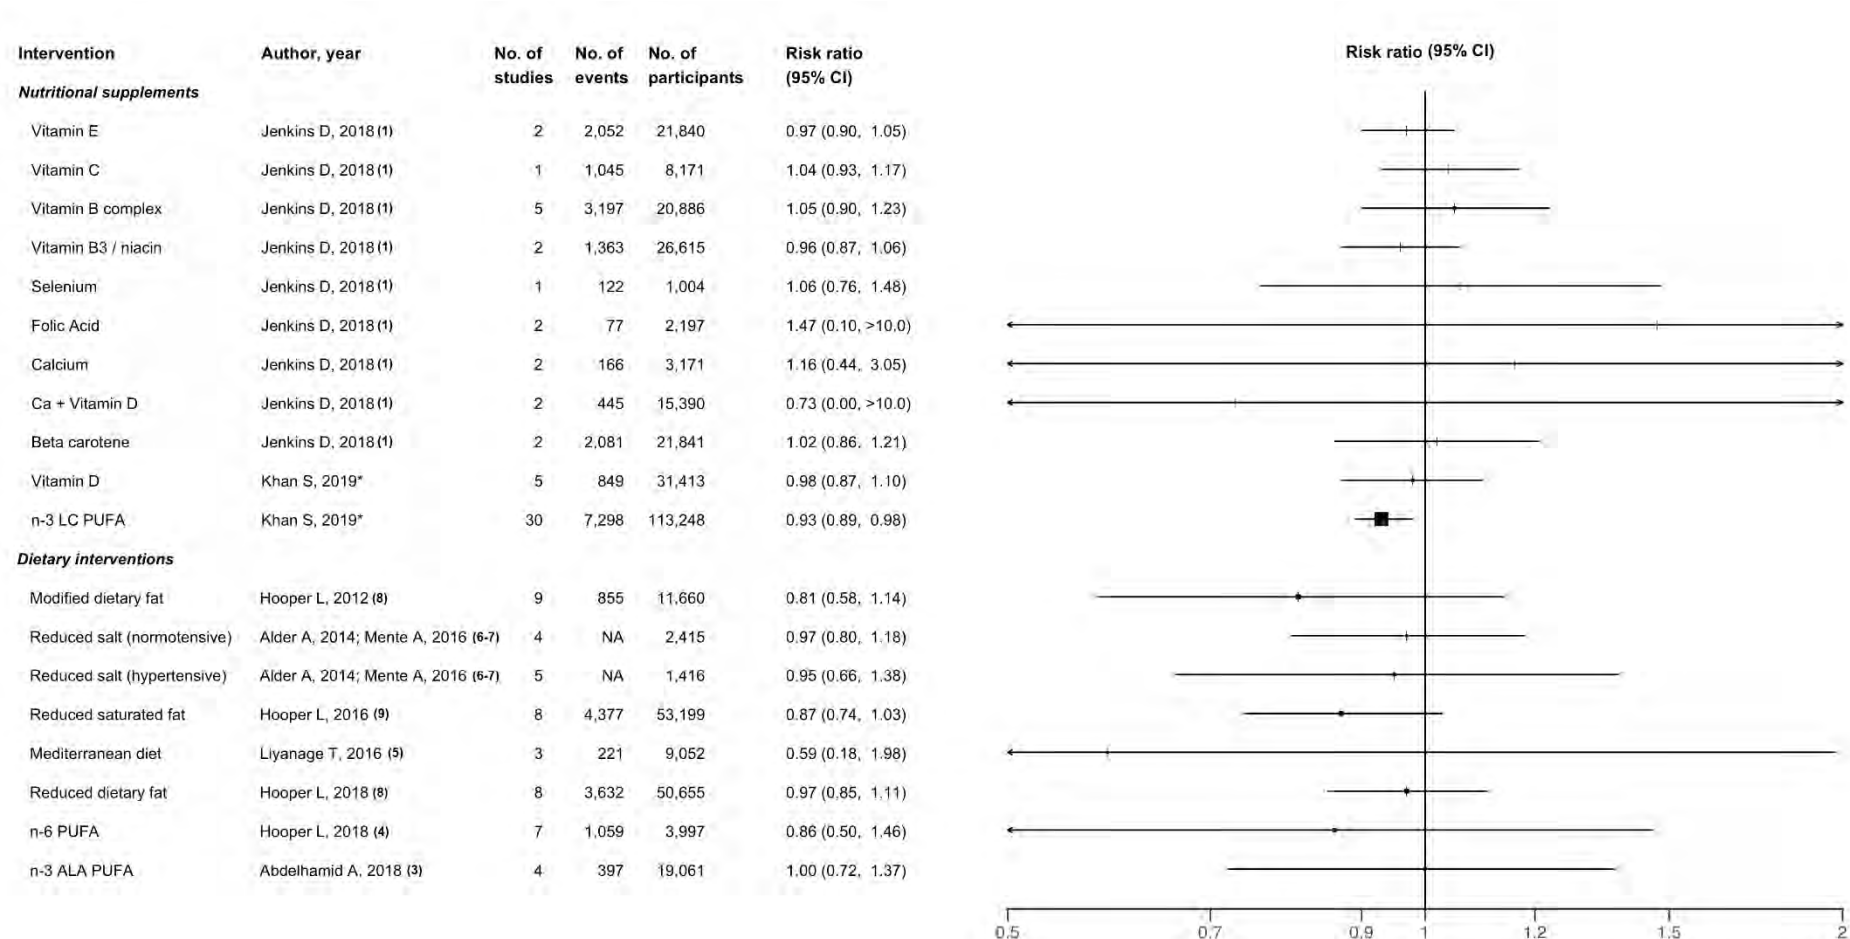

ALA (Alpha Linolenic Acid), Ca (Calcium), LC (Long Chain), n-3 (omega 3), n-6 (omega 6), NA (Not Available); PUFA (Polyunsaturated Fatty Acid).

\*Updated meta-analysis after inclusion of new clinical trials

Supplement Figure 4: Forest plot showing effects of n-3 long chain polyunsaturated fatty acids (LC PUFA) on all-cause mortality

| Study                    | Experimental Events | Total         | Control Events | Total         | Risk ratio (95% CI)      |
|--------------------------|---------------------|---------------|----------------|---------------|--------------------------|
| DART, 1989               | 94                  | 1,015         | 131            | 1,018         | 0.72 (0.56, 0.92)        |
| Bates, 1989              | 1                   | 155           | 0              | 157           | 3.04 (0.12, >10.0)       |
| HARP, 1995               | 0                   | 41            | 1              | 39            | 0.32 (0.01, 7.56)        |
| SHOT, 1996               | 8                   | 317           | 6              | 293           | 1.23 (0.43, 3.51)        |
| GISSI-P, 1999            | 472                 | 5,666         | 545            | 5,658         | 0.86 (0.77, 0.97)        |
| SCIMO, 1999              | 1                   | 112           | 2              | 111           | 0.50 (0.05, 5.39)        |
| OFAMI, 2001              | 11                  | 150           | 11             | 150           | 1.00 (0.45, 2.24)        |
| Brox, 2001               | 0                   | 80            | 1              | 40            | 0.17 (0.01, 4.03)        |
| DART-2, 2003             | 283                 | 1,571         | 242            | 1,543         | 1.15 (0.98, 1.34)        |
| DISAF, 2003              | 6                   | 201           | 8              | 206           | 0.77 (0.27, 2.18)        |
| Berson, 2004             | 0                   | 105           | 1              | 103           | 0.33 (0.01, 7.94)        |
| FAAT, 2005               | 13                  | 200           | 12             | 202           | 1.09 (0.51, 2.34)        |
| Raitt, 2005              | 4                   | 100           | 10             | 100           | 0.40 (0.13, 1.23)        |
| SOFA, 2006               | 8                   | 273           | 14             | 273           | 0.57 (0.24, 1.34)        |
| JELIS, 2007              | 286                 | 9,326         | 265            | 9,319         | 1.08 (0.91, 1.27)        |
| GISSI-HF, 2008           | 955                 | 3,494         | 1,014          | 3,481         | 0.94 (0.87, 1.01)        |
| EPIC-1, 2008             | 1                   | 183           | 0              | 180           | 2.95 (0.12, >10.0)       |
| EPIC-2, 2008             | 0                   | 189           | 1              | 190           | 0.34 (0.01, 8.17)        |
| OMEGA, 2009              | 88                  | 1,919         | 70             | 1,885         | 1.23 (0.91, 1.68)        |
| Nutristroke, 2009        | 0                   | 38            | 4              | 34            | 0.10 (0.01, 1.78)        |
| AlphaOmega EPA+DHA, 2010 | 186                 | 2,404         | 184            | 2,433         | 1.02 (0.84, 1.24)        |
| SU.FOL.OM3, 2010         | 66                  | 1,253         | 68             | 1,248         | 0.97 (0.70, 1.34)        |
| DO IT, 2010              | 14                  | 282           | 24             | 281           | 0.58 (0.31, 1.10)        |
| ADCS, 2010               | 11                  | 238           | 4              | 164           | 1.89 (0.61, 5.85)        |
| OPAL, 2010               | 9                   | 434           | 8              | 433           | 1.12 (0.44, 2.88)        |
| ORIGIN, 2012             | 951                 | 6,281         | 964            | 6,255         | 0.98 (0.90, 1.07)        |
| Risk % Prevention, 2013  | 348                 | 6,239         | 337            | 6,266         | 1.04 (0.90, 1.20)        |
| FORWARD, 2013            | 4                   | 289           | 5              | 297           | 0.82 (0.22, 3.03)        |
| NAT2, 2013               | 3                   | 150           | 6              | 150           | 0.50 (0.13, 1.96)        |
| Kumar, 2013              | 1                   | 39            | 1              | 39            | 1.00 (0.06, >10.0)       |
| AFFORD, 2013             | 0                   | 153           | 1              | 163           | 0.36 (0.01, 8.65)        |
| AREDS2, 2014             | 200                 | 2,147         | 168            | 2,056         | 1.14 (0.94, 1.39)        |
| Doi, 2014                | 2                   | 119           | 9              | 119           | 0.22 (0.05, 1.01)        |
| Shinto, 2014             | 1                   | 13            | 1              | 13            | 1.00 (0.07, >10.0)       |
| DIPP, 2015               | 2                   | 104           | 3              | 101           | 0.65 (0.11, 3.79)        |
| Derosa, 2016             | 1                   | 138           | 2              | 143           | 0.52 (0.05, 5.65)        |
| FOSTAR, 2016             | 0                   | 101           | 1              | 101           | 0.33 (0.01, 8.09)        |
| MAPT, 2017               | 18                  | 840           | 16             | 840           | 1.12 (0.58, 2.19)        |
| Zhang, 2017              | 0                   | 120           | 1              | 120           | 0.33 (0.01, 8.10)        |
| ASCEND, 2018             | 752                 | 7,740         | 788            | 7,740         | 0.95 (0.87, 1.05)        |
| VITAL, 2018              | 493                 | 12,933        | 485            | 12,938        | 1.02 (0.90, 1.15)        |
| <b>Overall</b>           | <b>5,293</b>        | <b>67,152</b> | <b>5,414</b>   | <b>66,882</b> | <b>0.98 (0.93, 1.02)</b> |

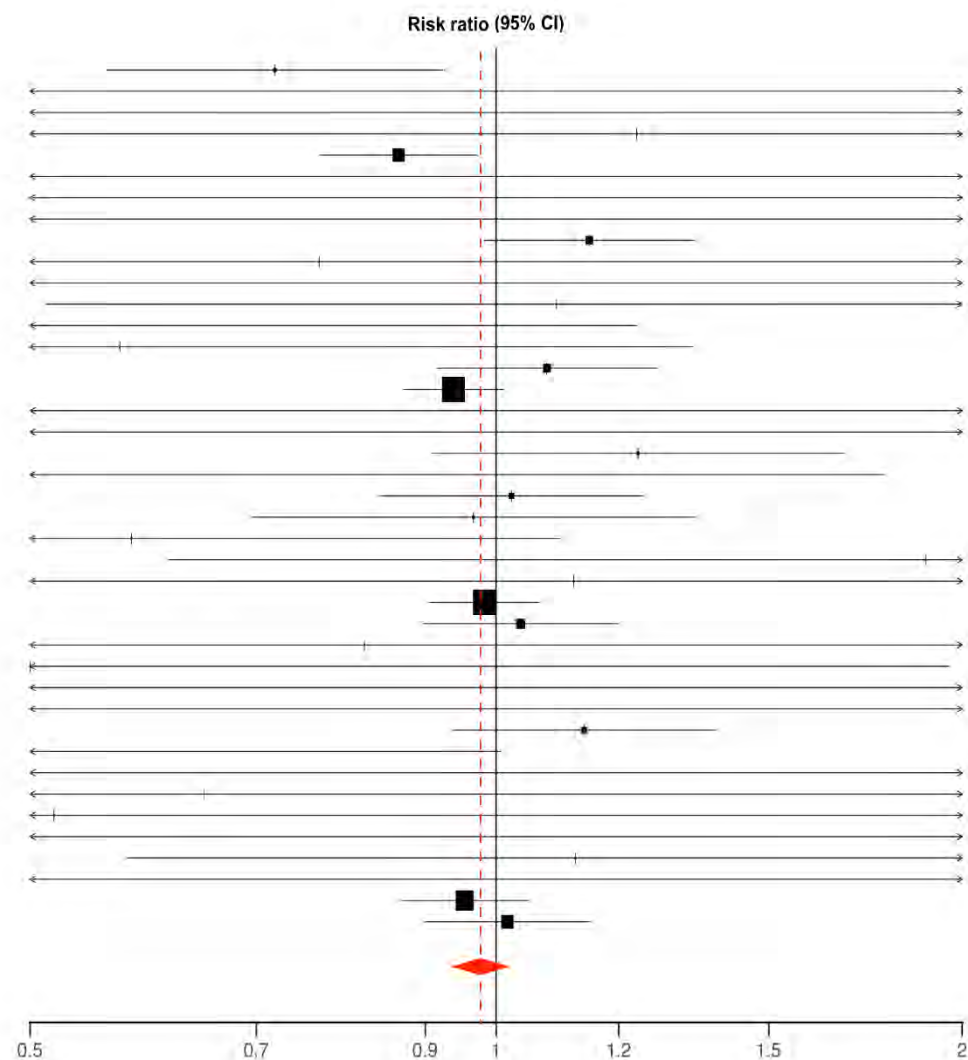

Supplement Figure 5: Forest plot showing effects of n-3 long chain polyunsaturated fatty acids (LC PUFA) on cardiovascular mortality

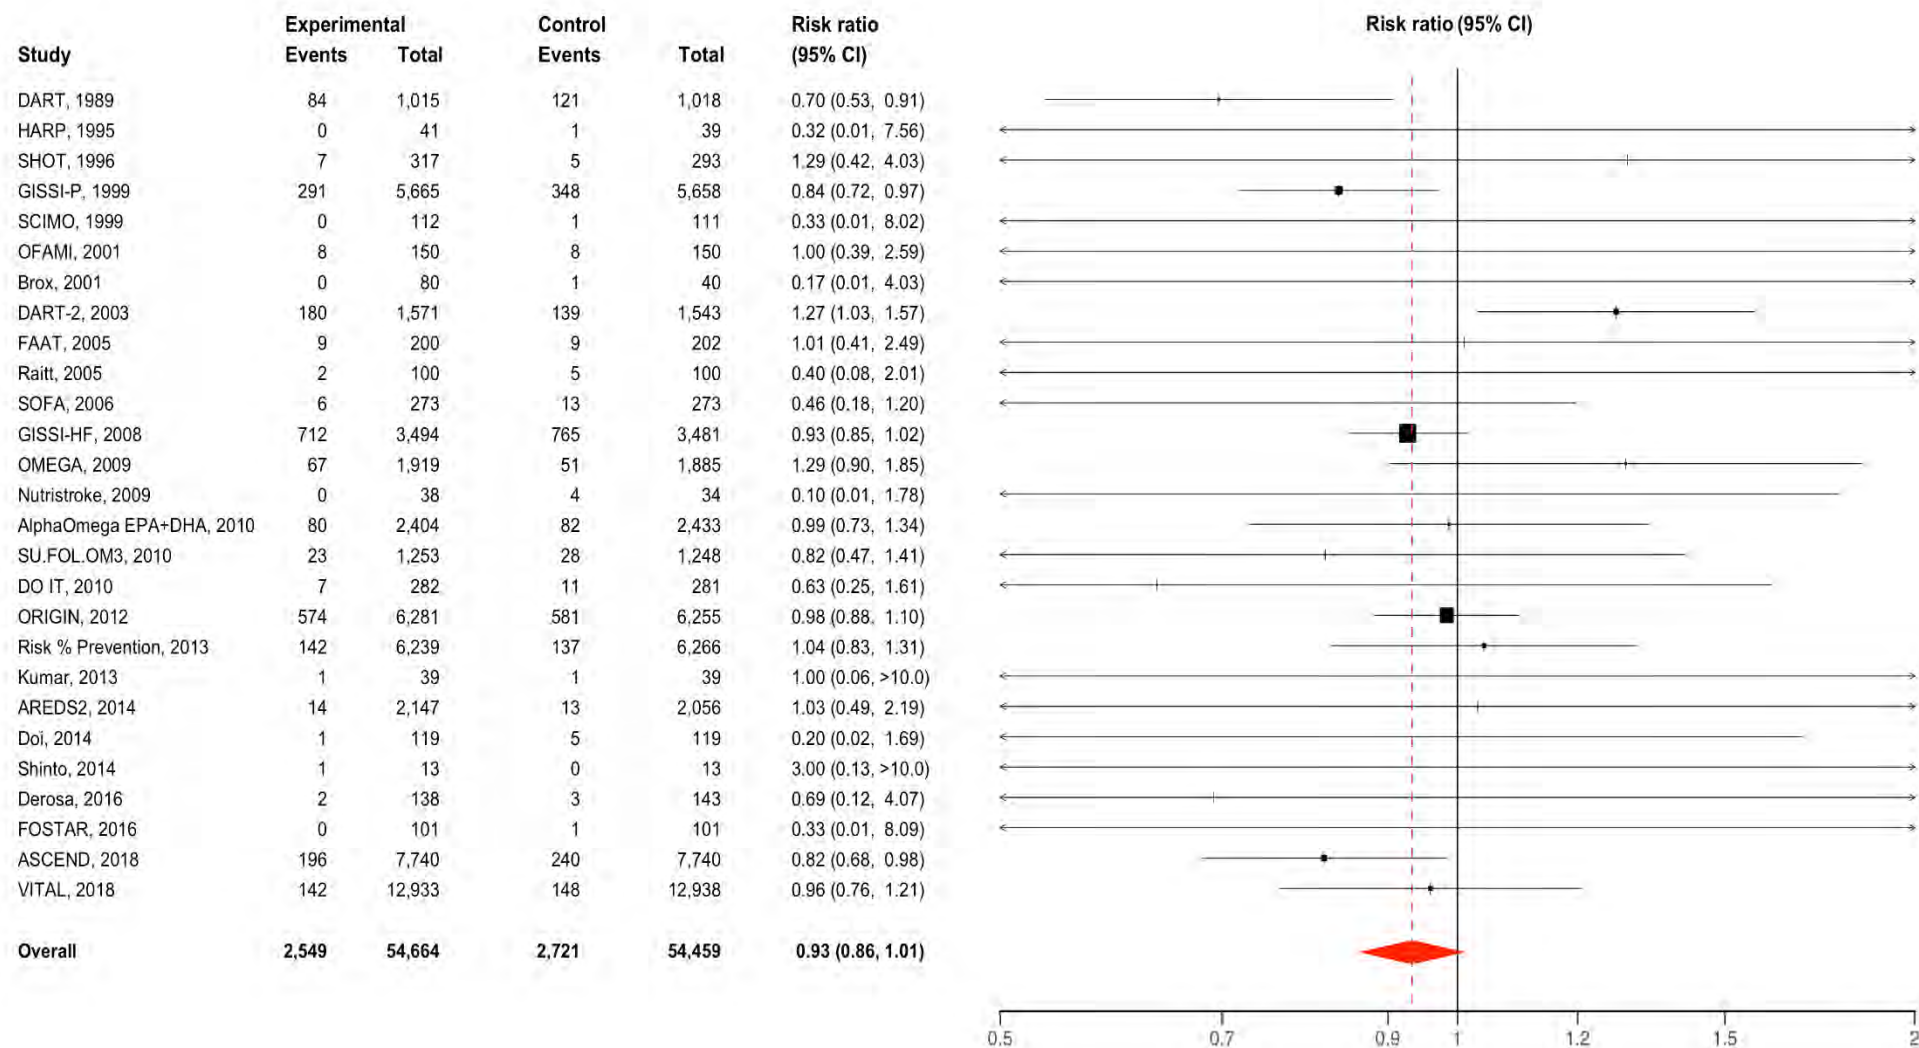



Supplement Figure 6: Forest plot showing effects n-3 long chain polyunsaturated fatty acids (LC PUFA) on myocardial infarction

| Study                    | Experimental |               | Control      |               | Risk ratio<br>(95% CI)   |
|--------------------------|--------------|---------------|--------------|---------------|--------------------------|
|                          | Events       | Total         | Events       | Total         |                          |
| DART, 1989               | 207          | 1,015         | 215          | 1,018         | 0.97 (0.81, 1.14)        |
| HARP, 1995               | 1            | 41            | 3            | 39            | 0.32 (0.03, 2.92)        |
| SHOT, 1996               | 7            | 317           | 12           | 293           | 0.54 (0.22, 1.35)        |
| SCIMO, 1999              | 1            | 112           | 4            | 111           | 0.25 (0.03, 2.18)        |
| Brox, 2001               | 0            | 80            | 1            | 40            | 0.17 (0.01, 4.03)        |
| Raiff, 2005              | 1            | 100           | 3            | 100           | 0.33 (0.04, 3.15)        |
| Baldassarre, 2006        | 1            | 32            | 0            | 32            | 3.00 (0.13, >10.0)       |
| SOFA, 2006               | 1            | 273           | 3            | 273           | 0.33 (0.03, 3.18)        |
| JELIS, 2007              | 71           | 9,326         | 93           | 9,319         | 0.76 (0.56, 1.04)        |
| THIS DIET, 2008          | 1            | 51            | 3            | 50            | 0.33 (0.04, 3.04)        |
| GISSI-HF, 2008           | 107          | 3,494         | 129          | 3,481         | 0.83 (0.64, 1.06)        |
| OMEGA, 2009              | 87           | 1,919         | 78           | 1,885         | 1.10 (0.81, 1.48)        |
| AlphaOmega EPA+DHA, 2010 | 89           | 2,404         | 102          | 2,433         | 0.88 (0.67, 1.17)        |
| SU.FOL.OM3, 2010         | 32           | 1,253         | 32           | 1,248         | 1.00 (0.61, 1.62)        |
| DO IT, 2010              | 11           | 282           | 9            | 281           | 1.22 (0.51, 2.89)        |
| ORIGIN, 2012             | 344          | 6,281         | 316          | 6,255         | 1.08 (0.93, 1.26)        |
| Risk % Prevention, 2013  | 80           | 6,239         | 90           | 6,266         | 0.89 (0.66, 1.20)        |
| FORWARD, 2013            | 1            | 289           | 1            | 297           | 1.03 (0.06, >10.0)       |
| EPOCH, 2014              | 1            | 195           | 0            | 196           | 3.02 (0.12, >10.0)       |
| AREDS2, 2014             | 28           | 2,147         | 30           | 2,056         | 0.89 (0.54, 1.49)        |
| Doi, 2014                | 1            | 119           | 0            | 119           | 3.00 (0.12, >10.0)       |
| Proudman, 2015           | 1            | 87            | 0            | 53            | 1.83 (0.08, >10.0)       |
| Derosa, 2016             | 0            | 128           | 3            | 130           | 0.15 (0.01, 2.78)        |
| ASCEND, 2018             | 186          | 7,740         | 200          | 7,740         | 0.93 (0.76, 1.13)        |
| VITAL, 2018              | 145          | 12,933        | 200          | 12,938        | 0.73 (0.59, 0.90)        |
| <b>Overall</b>           | <b>1,404</b> | <b>56,857</b> | <b>1,527</b> | <b>56,653</b> | <b>0.92 (0.85, 0.99)</b> |

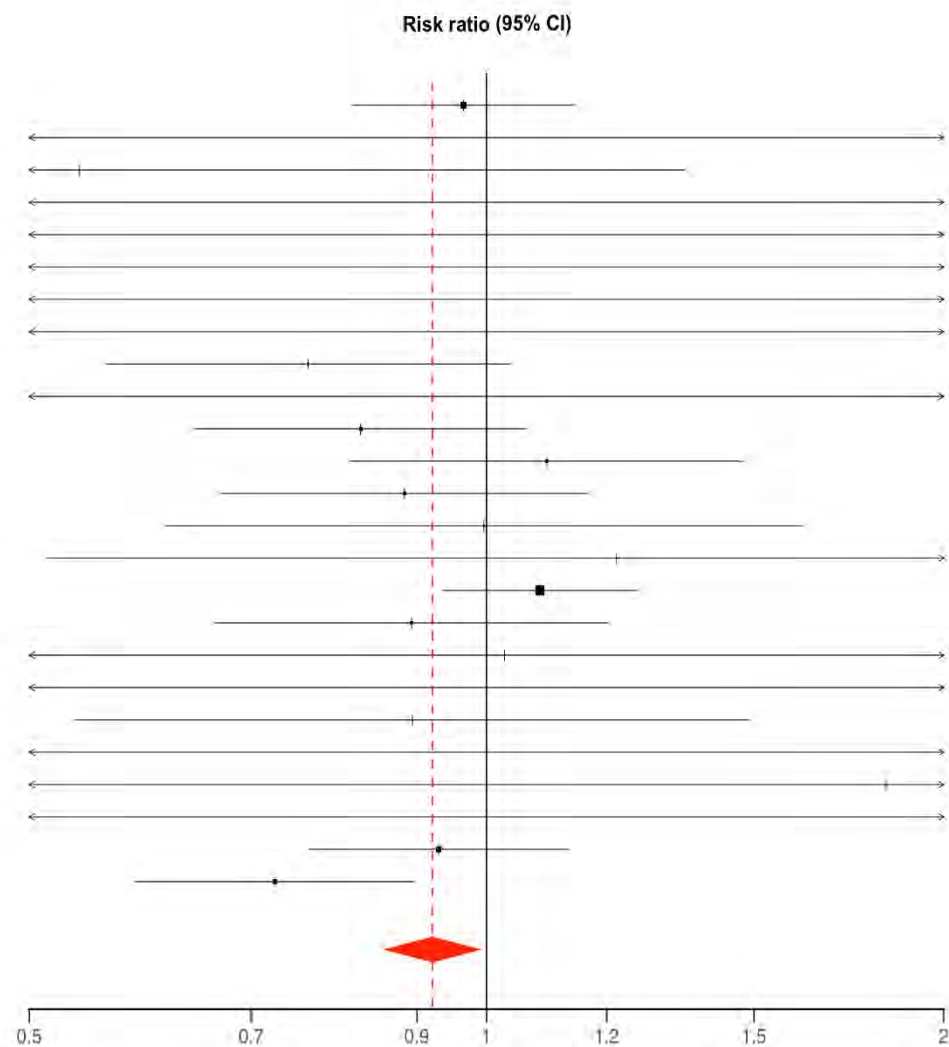

Supplement Figure 7: Forest plot showing effects of n-3 long chain polyunsaturated fatty acids (LC PUFA) on stroke

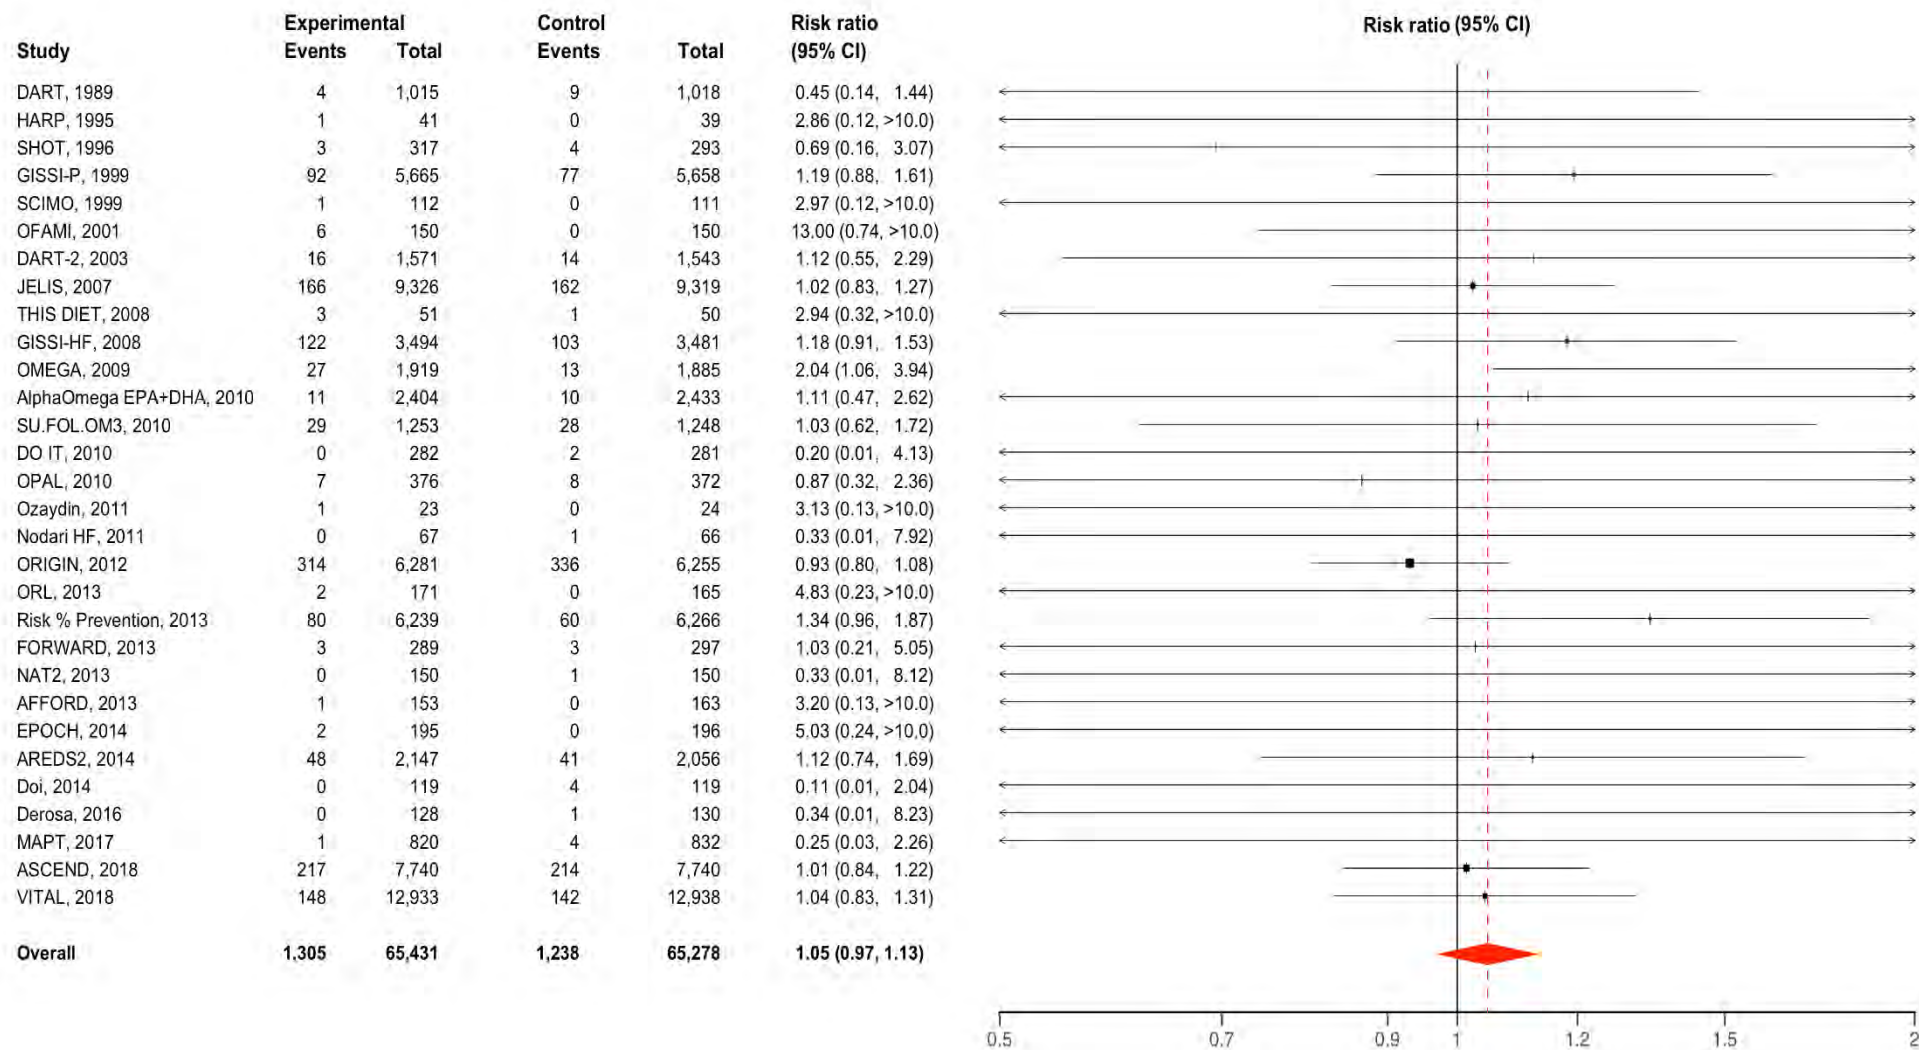

Supplement Figure 8: Forest plot showing effects of n n-3 long chain polyunsaturated fatty acids (LC PUFA) on coronary heart disease

| Study                    | Experimental |               | Control      |               | Risk ratio<br>(95% CI)   |
|--------------------------|--------------|---------------|--------------|---------------|--------------------------|
|                          | Events       | Total         | Events       | Total         |                          |
| DART, 1989               | 337          | 1,015         | 366          | 1,018         | 0.92 (0.82, 1.04)        |
| Nye, 1990                | 5            | 36            | 11           | 37            | 0.47 (0.18, 1.21)        |
| HARP, 1995               | 7            | 41            | 7            | 39            | 0.95 (0.37, 2.46)        |
| SHOT, 1996               | 7            | 317           | 12           | 293           | 0.54 (0.22, 1.35)        |
| GISSI-P, 1999            | 424          | 5,666         | 485          | 5,658         | 0.87 (0.77, 0.99)        |
| SCIMO, 1999              | 1            | 112           | 4            | 111           | 0.25 (0.03, 2.18)        |
| OFAMI, 2001              | 42           | 150           | 36           | 150           | 1.17 (0.80, 1.71)        |
| Brox, 2001               | 0            | 80            | 1            | 40            | 0.17 (0.01, 4.03)        |
| Raitt, 2005              | 1            | 100           | 3            | 100           | 0.33 (0.04, 3.15)        |
| Baldassarre, 2006        | 1            | 32            | 0            | 32            | 3.00 (0.13, >10.0)       |
| SOFA, 2006               | 1            | 273           | 3            | 273           | 0.33 (0.03, 3.18)        |
| JELIS, 2007              | 262          | 9,326         | 324          | 9,319         | 0.81 (0.69, 0.95)        |
| THIS DIET, 2008          | 10           | 51            | 6            | 50            | 1.63 (0.64, 4.16)        |
| GISSI-HF, 2008           | 107          | 3,494         | 129          | 3,481         | 0.83 (0.64, 1.06)        |
| ADCS, 2008               | 10           | 51            | 6            | 50            | 1.63 (0.64, 4.16)        |
| OMEGA, 2009              | 547          | 1,919         | 568          | 1,885         | 0.95 (0.86, 1.04)        |
| AlphaOmega EPA+DHA, 2010 | 122          | 2,404         | 132          | 2,433         | 0.94 (0.74, 1.19)        |
| SU.FOL.OM3, 2010         | 51           | 1,253         | 53           | 1,248         | 0.96 (0.66, 1.40)        |
| DO IT, 2010              | 11           | 282           | 9            | 281           | 1.22 (0.51, 2.89)        |
| ORIGIN, 2012             | 344          | 6,281         | 316          | 6,255         | 1.08 (0.93, 1.26)        |
| FORWARD, 2013            | 1            | 289           | 1            | 297           | 1.03 (0.06, >10.0)       |
| EPE-A, 2014              | 2            | 168           | 1            | 75            | 0.89 (0.08, 9.70)        |
| EPOCH, 2014              | 1            | 195           | 0            | 196           | 3.02 (0.12, >10.0)       |
| AREDS2, 2014             | 28           | 2,147         | 30           | 2,056         | 0.89 (0.54, 1.49)        |
| Doi, 2014                | 1            | 119           | 0            | 119           | 3.00 (0.12, >10.0)       |
| Proudman, 2015           | 1            | 87            | 0            | 53            | 1.83 (0.08, >10.0)       |
| Derosa, 2016             | 0            | 128           | 4            | 130           | 0.11 (0.01, 2.07)        |
| FOSTAR, 2016             | 10           | 101           | 10           | 101           | 1.00 (0.44, 2.30)        |
| ASCEND, 2018             | 882          | 7,740         | 887          | 7,740         | 0.99 (0.91, 1.09)        |
| VITAL, 2018              | 308          | 12,933        | 370          | 12,938        | 0.83 (0.72, 0.97)        |
| <b>Overall</b>           | <b>3,524</b> | <b>56,790</b> | <b>3,774</b> | <b>56,458</b> | <b>0.93 (0.89, 0.98)</b> |

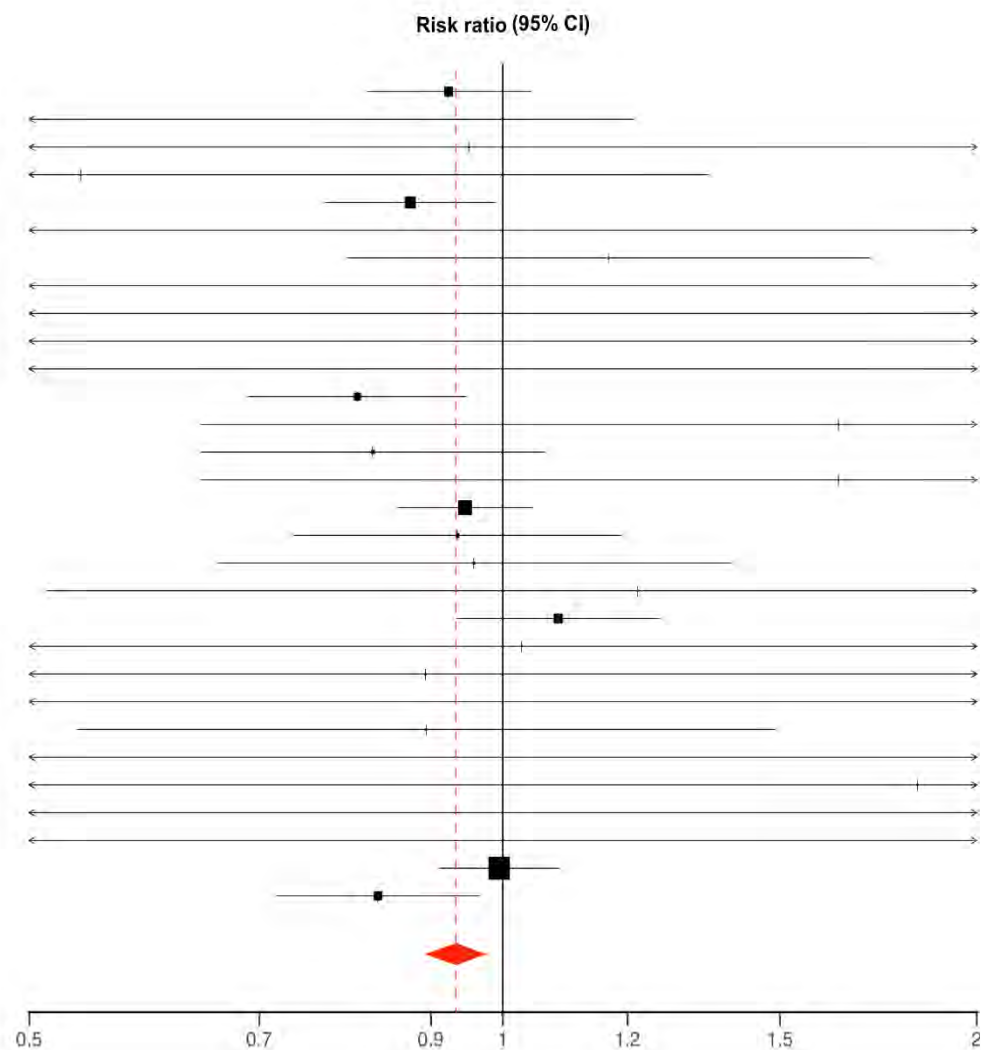

Supplement Figure 9: Forest plot showing effects of vitamin D on all-cause mortality

| Study             | Experimental Events | Total         | Control Events | Total         | Risk ratio (95% CI)      |
|-------------------|---------------------|---------------|----------------|---------------|--------------------------|
| Brohult, 1973     | 1                   | 25            | 0              | 25            | 3.00 (0.13, >10.0)       |
| Inkovaara, 1983   | 7                   | 45            | 5              | 42            | 1.31 (0.45, 3.80)        |
| Corless, 1985     | 8                   | 41            | 8              | 41            | 1.00 (0.42, 2.41)        |
| Ott, 1989         | 0                   | 43            | 1              | 43            | 0.33 (0.01, 7.96)        |
| Gallagher, 1990   | 1                   | 25            | 0              | 25            | 3.00 (0.13, >10.0)       |
| Grady, 1991       | 1                   | 50            | 0              | 48            | 2.88 (0.12, >10.0)       |
| Ooms, 1995        | 11                  | 177           | 21             | 171           | 0.51 (0.25, 1.02)        |
| Hamdy, 1995       | 4                   | 89            | 1              | 87            | 3.91 (0.45, >10.0)       |
| Lips, 1996        | 223                 | 1,291         | 251            | 1,287         | 0.89 (0.75, 1.04)        |
| Sato, 1997        | 1                   | 45            | 1              | 39            | 0.87 (0.06, >10.0)       |
| Sato, 1999        | 1                   | 43            | 0              | 43            | 3.00 (0.13, >10.0)       |
| OSTPRE, 1999      | 0                   | 112           | 1              | 115           | 0.34 (0.01, 8.31)        |
| Frazao, 2000      | 1                   | 71            | 2              | 67            | 0.47 (0.04, 5.08)        |
| STOP IT, 2001     | 1                   | 123           | 1              | 123           | 1.00 (0.06, >10.0)       |
| Meyer, 2002       | 169                 | 569           | 163            | 575           | 1.05 (0.87, 1.26)        |
| Cooper, 2003      | 0                   | 93            | 1              | 94            | 0.34 (0.01, 8.16)        |
| Trivedi, 2003     | 224                 | 1,345         | 247            | 1,341         | 0.90 (0.77, 1.07)        |
| NONOF, 2004       | 7                   | 38            | 5              | 37            | 1.36 (0.47, 3.91)        |
| Dukas, 2004       | 1                   | 192           | 1              | 186           | 0.97 (0.06, >10.0)       |
| Sato, 2005        | 1                   | 48            | 2              | 48            | 0.50 (0.05, 5.33)        |
| Flicker, 2005     | 76                  | 313           | 85             | 312           | 0.89 (0.68, 1.16)        |
| RECORD, 2005      | 438                 | 2,649         | 460            | 2,643         | 0.95 (0.84, 1.07)        |
| Aloia, 2005       | 1                   | 104           | 2              | 104           | 0.50 (0.05, 5.43)        |
| Schleithoff, 2006 | 7                   | 61            | 6              | 62            | 1.19 (0.42, 3.33)        |
| Law, 2006         | 347                 | 1,762         | 322            | 1,955         | 1.20 (1.04, 1.37)        |
| Coyne, 2006       | 2                   | 107           | 1              | 113           | 2.11 (0.19, >10.0)       |
| Smith, 2007       | 355                 | 4,727         | 354            | 4,713         | 1.00 (0.87, 1.15)        |
| Lyons, 2007       | 947                 | 1,725         | 953            | 1,715         | 0.99 (0.93, 1.05)        |
| Bjorkman, 2008    | 10                  | 73            | 9              | 68            | 1.04 (0.45, 2.39)        |
| Prince, 2008      | 0                   | 151           | 1              | 151           | 0.33 (0.01, 8.12)        |
| VITAL D, 2010     | 40                  | 1,131         | 47             | 1,127         | 0.85 (0.56, 1.28)        |
| Janssen, 2010     | 1                   | 36            | 0              | 34            | 2.84 (0.12, >10.0)       |
| VITAL, 2010       | 1                   | 95            | 0              | 93            | 2.94 (0.12, >10.0)       |
| Grimnes, 2011     | 0                   | 51            | 1              | 53            | 0.35 (0.01, 8.31)        |
| Cherniack, 2011   | 1                   | 23            | 0              | 23            | 3.00 (0.13, >10.0)       |
| Lehouck, 2012     | 9                   | 91            | 6              | 91            | 1.50 (0.56, 4.04)        |
| Glendenning, 2012 | 2                   | 353           | 0              | 333           | 4.72 (0.23, >10.0)       |
| Alvarez, 2012     | 1                   | 24            | 1              | 24            | 1.00 (0.07, >10.0)       |
| TIDE, 2012        | 0                   | 607           | 2              | 614           | 0.20 (0.01, 4.21)        |
| Witham, 2013      | 1                   | 39            | 0              | 36            | 2.77 (0.12, >10.0)       |
| Hewitt, 2013      | 1                   | 30            | 1              | 30            | 1.00 (0.07, >10.0)       |
| Delanaye, 2013    | 6                   | 22            | 5              | 21            | 1.15 (0.41, 3.19)        |
| VitDISH, 2013     | 0                   | 80            | 1              | 79            | 0.33 (0.01, 7.96)        |
| ViDA, 2017        | 18                  | 2,558         | 15             | 2,550         | 1.20 (0.60, 2.37)        |
| VITAL, 2018       | 485                 | 12,927        | 493            | 12,944        | 0.99 (0.87, 1.11)        |
| <b>Overall</b>    | <b>3,411</b>        | <b>34,204</b> | <b>3,476</b>   | <b>34,325</b> | <b>0.99 (0.96, 1.02)</b> |

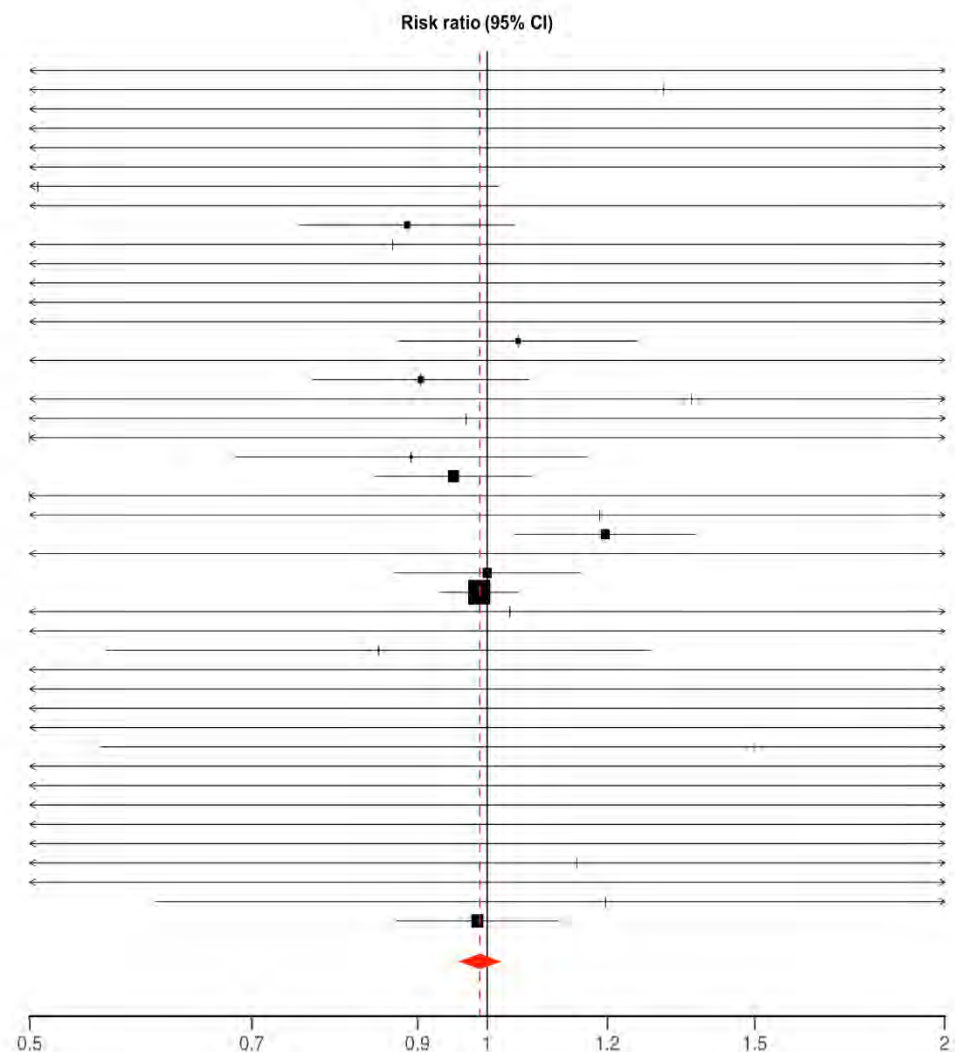

Supplement Figure 10: Forest plot showing effects of vitamin D on cardiovascular mortality

| Study          | Experimental |               | Control    |               | Risk ratio<br>(95% CI)   |
|----------------|--------------|---------------|------------|---------------|--------------------------|
|                | Events       | Total         | Events     | Total         |                          |
| Trivedi, 2003  | 103          | 1,345         | 117        | 1,341         | 0.88 (0.68, 1.13)        |
| TIDE, 2012     | 0            | 607           | 1          | 614           | 0.34 (0.01, 8.26)        |
| ViDA, 2017     | 18           | 2,558         | 15         | 2,558         | 1.20 (0.61, 2.38)        |
| VITAL, 2018    | 152          | 12,927        | 138        | 12,944        | 1.10 (0.88, 1.39)        |
| <b>Overall</b> | <b>273</b>   | <b>17,437</b> | <b>271</b> | <b>17,457</b> | <b>1.00 (0.79, 1.28)</b> |

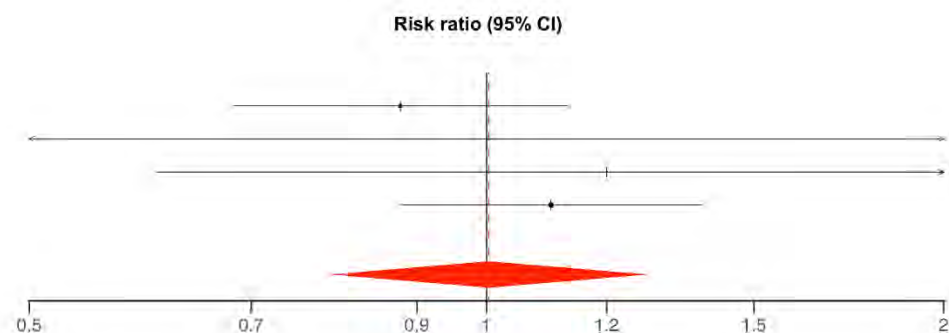



Supplement Figure 11: Forest plot showing effects of vitamin D on myocardial infarction

| Study           | Experimental Events | Experimental Total | Control Events | Control Total | Risk ratio (95% CI)      |
|-----------------|---------------------|--------------------|----------------|---------------|--------------------------|
| Aloia, 1988     | 1                   | 12                 | 1              | 15            | 1.25 (0.09, >10.0)       |
| Ott, 1989       | 1                   | 43                 | 0              | 43            | 3.00 (0.13, >10.0)       |
| OSTPRE, 1999    | 1                   | 112                | 0              | 115           | 3.08 (0.13, >10.0)       |
| Trivedi, 2003   | 224                 | 1,345              | 233            | 1,341         | 0.96 (0.81, 1.13)        |
| Coburn, 2004    | 0                   | 27                 | 2              | 28            | 0.21 (0.01, 4.13)        |
| RECORD, 2005    | 78                  | 2,649              | 84             | 2,643         | 0.93 (0.68, 1.25)        |
| Lappe, 2007     | 3                   | 445                | 2              | 446           | 1.50 (0.25, 8.95)        |
| Prince, 2008    | 2                   | 151                | 3              | 151           | 0.67 (0.11, 3.93)        |
| VITAL, 2010     | 2                   | 95                 | 0              | 93            | 4.90 (0.24, >10.0)       |
| Cherniack, 2011 | 1                   | 23                 | 1              | 23            | 1.00 (0.07, >10.0)       |
| TIDE, 2012      | 1                   | 607                | 1              | 614           | 1.01 (0.06, >10.0)       |
| OPERA, 2014     | 0                   | 30                 | 2              | 30            | 0.20 (0.01, 4.00)        |
| ViDA, 2017      | 28                  | 2,558              | 31             | 2,558         | 0.90 (0.54, 1.50)        |
| VITAL, 2018     | 169                 | 12,927             | 176            | 12,944        | 0.96 (0.78, 1.19)        |
| <b>Overall</b>  | <b>511</b>          | <b>21,024</b>      | <b>536</b>     | <b>21,044</b> | <b>0.95 (0.88, 1.03)</b> |

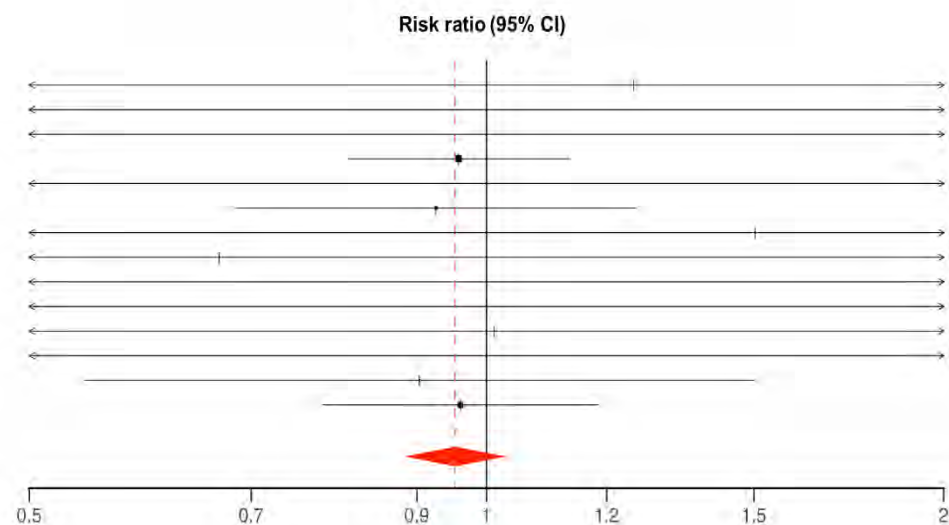

Supplement Figure 12: Forest plot showing effects of vitamin D on stroke

| Study           | Experimental<br>Events | Total         | Control<br>Events | Total         | Risk ratio<br>(95% CI)   |
|-----------------|------------------------|---------------|-------------------|---------------|--------------------------|
| Inkovaara, 1983 | 12                     | 45            | 5                 | 42            | 2.24 (0.86, 5.82)        |
| STOP IT, 2001   | 4                      | 123           | 3                 | 123           | 1.33 (0.30, 5.83)        |
| Trivedi, 2003   | 105                    | 1,345         | 101               | 1,341         | 1.04 (0.80, 1.35)        |
| RECORD, 2005    | 118                    | 2,549         | 104               | 2,643         | 1.18 (0.91, 1.52)        |
| Lappe, 2007     | 6                      | 446           | 5                 | 445           | 1.20 (0.37, 3.89)        |
| Prince, 2008    | 3                      | 151           | 3                 | 151           | 1.00 (0.21, 4.88)        |
| VITAL, 2010     | 1                      | 95            | 0                 | 93            | 2.94 (0.12, >10.0)       |
| VIDOS, 2012     | 1                      | 20            | 0                 | 21            | 3.15 (0.14, >10.0)       |
| TIDE, 2012      | 1                      | 607           | 1                 | 614           | 1.01 (0.06, >10.0)       |
| VitDISH, 2013   | 3                      | 80            | 1                 | 79            | 2.96 (0.31, >10.0)       |
| OPERA, 2014     | 0                      | 30            | 2                 | 30            | 0.20 (0.01, 4.00)        |
| VIDA, 2017      | 26                     | 2,558         | 27                | 2,558         | 0.96 (0.56, 1.65)        |
| VITAL, 2018     | 141                    | 12,927        | 149               | 12,944        | 0.95 (0.75, 1.19)        |
| <b>Overall</b>  | <b>421</b>             | <b>20,976</b> | <b>401</b>        | <b>21,084</b> | <b>1.06 (0.95, 1.19)</b> |

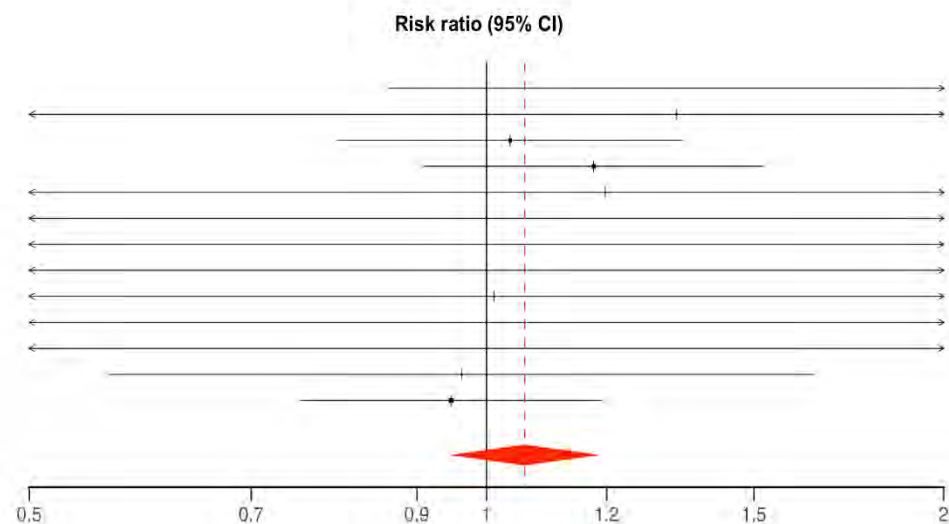

Supplement Figure 13: Forest plot showing effects of vitamin D on coronary heart disease

| Study           | Experimental |               | Control    |               | Risk ratio<br>(95% CI)   |
|-----------------|--------------|---------------|------------|---------------|--------------------------|
|                 | Events       | Total         | Events     | Total         |                          |
| Inkovaara, 1983 | 0            | 45            | 1          | 42            | 0.31 (0.01, 7.44)        |
| VITAL, 2010     | 1            | 95            | 0          | 93            | 2.94 (0.12, >10.0)       |
| VitDISH, 2013   | 2            | 80            | 2          | 79            | 0.99 (0.14, 6.84)        |
| ViDA, 2017      | 21           | 2,558         | 17         | 2,550         | 1.23 (0.65, 2.33)        |
| VITAL, 2018     | 396          | 12,927        | 409        | 12,944        | 0.97 (0.85, 1.11)        |
| <b>Overall</b>  | <b>420</b>   | <b>15,705</b> | <b>429</b> | <b>15,708</b> | <b>0.98 (0.87, 1.10)</b> |

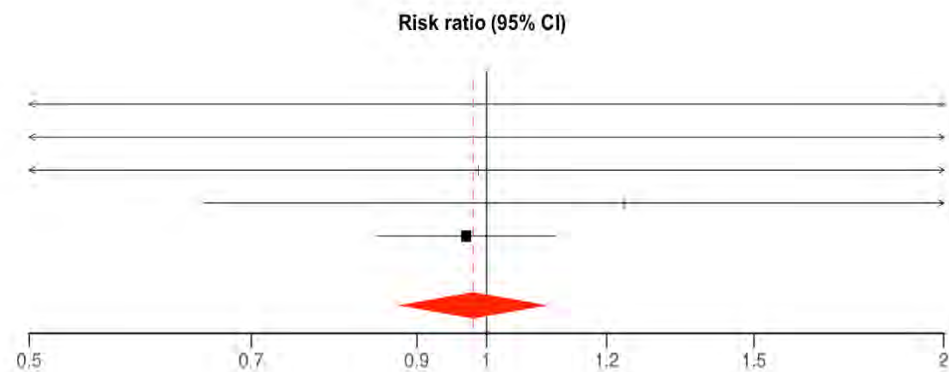



## References

1. Jenkins DJA, Spence JD, Giovannucci EL, Kim YI, Josse R, Vieth R, et al. Supplemental Vitamins and Minerals for CVD Prevention and Treatment. *J Am Coll Cardiol.* 2018;71(22):2570-84.
2. Riaz H, Khan SU, Rahman H, Shah NP, Kaluski E, Lincoff AM, et al. Effects of high-density lipoprotein targeting treatments on cardiovascular outcomes: A systematic review and meta-analysis. *Eur J Prev Cardiol.* 2019;26(5):533-43.
3. Abdelhamid AS, Brown TJ, Brainard JS, Biswas P, Thorpe GC, Moore HJ, et al. Omega-3 fatty acids for the primary and secondary prevention of cardiovascular disease. *Cochrane Database Syst Rev.* 2018;11:Cd003177.
4. Hooper L, Al-Khudairy L, Abdelhamid AS, Rees K, Brainard JS, Brown TJ, et al. Omega-6 fats for the primary and secondary prevention of cardiovascular disease. *Cochrane Database Syst Rev.* 2018;7:Cd011094.
5. Liyanage T, Ninomiya T, Wang A, Neal B, Jun M, Wong MG, et al. Effects of the Mediterranean Diet on Cardiovascular Outcomes-A Systematic Review and Meta-Analysis. *PLoS One.* 2016;11(8):e0159252.
6. Adler AJ, Taylor F, Martin N, Gottlieb S, Taylor RS, Ebrahim S. Reduced dietary salt for the prevention of cardiovascular disease. *Cochrane Database Syst Rev.* 2014(12):Cd009217.
7. Mentz A, O'Donnell M, Rangarajan S, Dagenais G, Lear S, McQueen M, et al. Associations of urinary sodium excretion with cardiovascular events in individuals with and without hypertension: a pooled analysis of data from four studies. *Lancet.* 2016;388(10043):465-75.
8. Hooper L, Summerbell CD, Thompson R, Sills D, Roberts FG, Moore H, et al. Reduced or modified dietary fat for preventing cardiovascular disease. *Cochrane Database Syst Rev.* 2011(7):Cd002137.
9. Hooper L, Martin N, Abdelhamid A, Davey Smith G. Reduction in saturated fat intake for cardiovascular disease. *Cochrane Database Syst Rev.* 2015(6):Cd011737.
10. Brohult J, Jonson B. Effects of large doses of calciferol on patients with rheumatoid arthritis. A double-blind clinical trial. *Scand J Rheumatol.* 1973;2(4):173-6.
11. Clofibrate and niacin in coronary heart disease. *Jama.* 1975;231(4):360-81.
12. Gillilan RE, Mondell B, Warbasse JR. Quantitative evaluation of vitamin E in the treatment of angina pectoris. *Am Heart J.* 1977;93(4):444-9.
13. Inkovaara J, Gothoni G, Halttula R, Heikinheimo R, Tokola O. Calcium, vitamin D and anabolic steroid in treatment of aged bones: double-blind placebo-controlled long-term clinical trial. *Age Ageing.* 1983;12(2):124-30.
14. Corless D, Dawson E, Fraser F, Ellis M, Evans SJ, Perry JD, et al. Do vitamin D supplements improve the physical capabilities of elderly hospital patients? *Age Ageing.* 1985;14(2):76-84.
15. Aloia JF, Vaswani A, Yeh JK, Ellis K, Yasumura S, Cohn SH. Calcitriol in the treatment of postmenopausal osteoporosis. *Am J Med.* 1988;84(3 Pt 1):401-8.
16. Korpela H, Kumpulainen J, Jussila E, Kemila S, Kaariainen M, Kaariainen T, et al. Effect of selenium supplementation after acute myocardial infarction. *Res Commun Chem Pathol Pharmacol.* 1989;65(2):249-52.
17. McKeown-Eyssen G, Holloway C, Jazmaji V, Bright-See E, Dion P, Bruce WR. A randomized trial of vitamins C and E in the prevention of recurrence of colorectal polyps. *Cancer Res.* 1988;48(16):4701-5.
18. Ott SM, Chesnut CH, 3rd. Calcitriol treatment is not effective in postmenopausal osteoporosis. *Ann Intern Med.* 1989;110(4):267-74.
19. Gallagher JC, Goldgar D. Treatment of postmenopausal osteoporosis with high doses of synthetic calcitriol. A randomized controlled study. *Ann Intern Med.* 1990;113(9):649-55.

20. Grady D, Halloran B, Cummings S, Leveille S, Wells L, Black D, et al. 1,25-Dihydroxyvitamin D<sub>3</sub> and muscle strength in the elderly: a randomized controlled trial. *J Clin Endocrinol Metab.* 1991;73(5):1111-7.
21. Chapuy MC, Arlot ME, Duboeuf F, Brun J, Crouzet B, Arnaud S, et al. Vitamin D<sub>3</sub> and calcium to prevent hip fractures in the elderly women. *N Engl J Med.* 1992;327(23):1637-42.
22. Li JY, Taylor PR, Li B, Dawsey S, Wang GQ, Ershow AG, et al. Nutrition intervention trials in Linxian, China: multiple vitamin/mineral supplementation, cancer incidence, and disease-specific mortality among adults with esophageal dysplasia. *J Natl Cancer Inst.* 1993;85(18):1492-8.
23. Bogden JD, Bendich A, Kemp FW, Bruening KS, Shurnick JH, Denny T, et al. Daily micronutrient supplements enhance delayed-hypersensitivity skin test responses in older people. *Am J Clin Nutr.* 1994;60(3):437-47.
24. de la Maza MP, Petermann M, Bunout D, Hirsch S. Effects of long-term vitamin E supplementation in alcoholic cirrhotics. *J Am Coll Nutr.* 1995;14(2):192-6.
25. Hamdy NA, Kanis JA, Beneton MN, Brown CB, Juttmann JR, Jordans JG, et al. Effect of alfacalcidol on natural course of renal bone disease in mild to moderate renal failure. *Bmj.* 1995;310(6976):358-63.
26. Ooms ME, Roos JC, Bezemer PD, van der Vijgh WJ, Bouter LM, Lips P. Prevention of bone loss by vitamin D supplementation in elderly women: a randomized double-blind trial. *J Clin Endocrinol Metab.* 1995;80(4):1052-8.
27. Pike J, Chandra RK. Effect of vitamin and trace element supplementation on immune indices in healthy elderly. *Int J Vitam Nutr Res.* 1995;65(2):117-21.
28. Steiner M, Glantz M, Lekos A. Vitamin E plus aspirin compared with aspirin alone in patients with transient ischemic attacks. *Am J Clin Nutr.* 1995;62(6 Suppl):1381s-4s.
29. Greenberg ER, Baron JA, Karagas MR, Stukel TA, Nierenberg DW, Stevens MM, et al. Mortality associated with low plasma concentration of beta carotene and the effect of oral supplementation. *Jama.* 1996;275(9):699-703.
30. Hennekens CH, Buring JE, Manson JE, Stampfer M, Rosner B, Cook NR, et al. Lack of effect of long-term supplementation with beta carotene on the incidence of malignant neoplasms and cardiovascular disease. *N Engl J Med.* 1996;334(18):1145-9.
31. Lips P, Graafmans WC, Ooms ME, Bezemer PD, Bouter LM. Vitamin D supplementation and fracture incidence in elderly persons. A randomized, placebo-controlled clinical trial. *Ann Intern Med.* 1996;124(4):400-6.
32. Omenn GS, Goodman GE, Thornquist MD, Balmes J, Cullen MR, Glass A, et al. Effects of a combination of beta carotene and vitamin A on lung cancer and cardiovascular disease. *N Engl J Med.* 1996;334(18):1150-5.
33. Stephens NG, Parsons A, Schofield PM, Kelly F, Cheeseman K, Mitchinson MJ. Randomised controlled trial of vitamin E in patients with coronary disease: Cambridge Heart Antioxidant Study (CHAOS). *Lancet.* 1996;347(9004):781-6.
34. Dawson-Hughes B, Harris SS, Krall EA, Dallal GE. Effect of calcium and vitamin D supplementation on bone density in men and women 65 years of age or older. *N Engl J Med.* 1997;337(10):670-6.
35. Girodon F, Lombard M, Galan P, Brunet-Lecomte P, Monget AL, Arnaud J, et al. Effect of micronutrient supplementation on infection in institutionalized elderly subjects: a controlled trial. *Ann Nutr Metab.* 1997;41(2):98-107.
36. Moon TE, Levine N, Cartmel B, Bangert JL, Rodney S, Dong Q, et al. Effect of retinol in preventing squamous cell skin cancer in moderate-risk subjects: a randomized, double-blind, controlled trial. Southwest Skin Cancer Prevention Study Group. *Cancer Epidemiol Biomarkers Prev.* 1997;6(11):949-56.

37. Sano M, Ernesto C, Thomas RG, Klauber MR, Schafer K, Grundman M, et al. A controlled trial of selegiline, alpha-tocopherol, or both as treatment for Alzheimer's disease. The Alzheimer's Disease Cooperative Study. *N Engl J Med.* 1997;336(17):1216-22.
38. Sato Y, Maruoka H, Oizumi K. Amelioration of hemiplegia-associated osteopenia more than 4 years after stroke by 1 alpha-hydroxyvitamin D3 and calcium supplementation. *Stroke.* 1997;28(4):736-9.
39. Baeksgaard L, Andersen KP, Hyldstrup L. Calcium and vitamin D supplementation increases spinal BMD in healthy, postmenopausal women. *Osteoporos Int.* 1998;8(3):255-60.
40. Mortality in DATATOP: a multicenter trial in early Parkinson's disease. Parkinson Study Group. *Ann Neurol.* 1998;43(3):318-25.
41. Virtamo J, Rapola JM, Ripatti S, Heinonen OP, Taylor PR, Albanes D, et al. Effect of vitamin E and beta carotene on the incidence of primary nonfatal myocardial infarction and fatal coronary heart disease. *Arch Intern Med.* 1998;158(6):668-75.
42. Baron JA, Beach M, Mandel JS, van Stolk RU, Haile RW, Sandler RS, et al. Calcium supplements for the prevention of colorectal adenomas. Calcium Polyp Prevention Study Group. *N Engl J Med.* 1999;340(2):101-7.
43. Hoffman RM, Garewal HS. Alpha-tocopherol supplementation for men with existing coronary artery disease: a feasibility study. *Prev Med.* 1999;29(2):112-8.
44. Girodon F, Galan P, Monget AL, Boutron-Ruault MC, Brunet-Lecomte P, Preziosi P, et al. Impact of trace elements and vitamin supplementation on immunity and infections in institutionalized elderly patients: a randomized controlled trial. MIN. VIT. AOX. geriatric network. *Arch Intern Med.* 1999;159(7):748-54.
45. Dietary supplementation with n-3 polyunsaturated fatty acids and vitamin E after myocardial infarction: results of the GISSI-Prevenzione trial. Gruppo Italiano per lo Studio della Sopravvivenza nell'Infarto miocardico. *Lancet.* 1999;354(9177):447-55.
46. Green A, Williams G, Neale R, Hart V, Leslie D, Parsons P, et al. Daily sunscreen application and betacarotene supplementation in prevention of basal-cell and squamous-cell carcinomas of the skin: a randomised controlled trial. *Lancet.* 1999;354(9180):723-9.
47. Komulainen M, Kroger H, Tuppurainen MT, Heikkinen AM, Alhava E, Honkanen R, et al. Prevention of femoral and lumbar bone loss with hormone replacement therapy and vitamin D3 in early postmenopausal women: a population-based 5-year randomized trial. *J Clin Endocrinol Metab.* 1999;84(2):546-52.
48. Krieg MA, Jacquet AF, Bremgartner M, Cuttelod S, Thiebaud D, Burckhardt P. Effect of supplementation with vitamin D3 and calcium on quantitative ultrasound of bone in elderly institutionalized women: a longitudinal study. *Osteoporos Int.* 1999;9(6):483-8.
49. Sato Y, Manabe S, Kuno H, Oizumi K. Amelioration of osteopenia and hypovitaminosis D by 1alpha-hydroxyvitamin D3 in elderly patients with Parkinson's disease. *J Neurol Neurosurg Psychiatry.* 1999;66(1):64-8.
50. Boaz M, Smetana S, Weinstein T, Matas Z, Gafter U, Iaina A, et al. Secondary prevention with antioxidants of cardiovascular disease in endstage renal disease (SPACE): randomised placebo-controlled trial. *Lancet.* 2000;356(9237):1213-8.
51. Correa P, Fontham ET, Bravo JC, Bravo LE, Ruiz B, Zarama G, et al. Chemoprevention of gastric dysplasia: randomized trial of antioxidant supplements and anti-helicobacter pylori therapy. *J Natl Cancer Inst.* 2000;92(23):1881-8.
52. Frazao JM, Elangovan L, Maung HM, Chesney RW, Acchiardo SR, Bower JD, et al. Intermittent doxercalciferol (1alpha-hydroxyvitamin D(2)) therapy for secondary hyperparathyroidism. *Am J Kidney Dis.* 2000;36(3):550-61.

53. Lee IM, Cook NR, Manson JE, Buring JE, Hennekens CH. beta-Carotene Supplementation and Incidence of Cancer and Cardiovascular Disease: the Women's Health Study. *J Natl Cancer Inst.* 1999;91(24):2102-6.
54. Leppala JM, Virtamo J, Fogelholm R, Huttunen JK, Albanes D, Taylor PR, et al. Controlled trial of alpha-tocopherol and beta-carotene supplements on stroke incidence and mortality in male smokers. *Arterioscler Thromb Vasc Biol.* 2000;20(1):230-5.
55. Jacobson JS, Begg MD, Wang LW, Wang Q, Agarwal M, Norkus E, et al. Effects of a 6-month vitamin intervention on DNA damage in heavy smokers. *Cancer Epidemiol Biomarkers Prev.* 2000;9(12):1303-11.
56. Salonen JT, Nyyssonen K, Salonen R, Lakka HM, Kaikkonen J, Porkkala-Sarataho E, et al. Antioxidant Supplementation in Atherosclerosis Prevention (ASAP) study: a randomized trial of the effect of vitamins E and C on 3-year progression of carotid atherosclerosis. *J Intern Med.* 2000;248(5):377-86.
57. A randomized, placebo-controlled, clinical trial of high-dose supplementation with vitamins C and E and beta carotene for age-related cataract and vision loss: AREDS report no. 9. *Arch Ophthalmol.* 2001;119(10):1439-52.
58. Brown BG, Zhao XQ, Chait A, Fisher LD, Cheung MC, Morse JS, et al. Simvastatin and niacin, antioxidant vitamins, or the combination for the prevention of coronary disease. *N Engl J Med.* 2001;345(22):1583-92.
59. de Gaetano G. Low-dose aspirin and vitamin E in people at cardiovascular risk: a randomised trial in general practice. Collaborative Group of the Primary Prevention Project. *Lancet.* 2001;357(9250):89-95.
60. Desnuelle C, Dib M, Garrel C, Favier A. A double-blind, placebo-controlled randomized clinical trial of alpha-tocopherol (vitamin E) in the treatment of amyotrophic lateral sclerosis. ALS riluzole-tocopherol Study Group. *Amyotroph Lateral Scler Other Motor Neuron Disord.* 2001;2(1):9-18.
61. de Waart FG, Kok FJ, Smilde TJ, Hijmans A, Wollersheim H, Stalenhoef AF. Effect of glutathione S-transferase M1 genotype on progression of atherosclerosis in lifelong male smokers. *Atherosclerosis.* 2001;158(1):227-31.
62. Gallagher JC, Fowler SE, Detter JR, Sherman SS. Combination treatment with estrogen and calcitriol in the prevention of age-related bone loss. *J Clin Endocrinol Metab.* 2001;86(8):3618-28.
63. You WC, Chang YS, Heinrich J, Ma JL, Liu WD, Zhang L, et al. An intervention trial to inhibit the progression of precancerous gastric lesions: compliance, serum micronutrients and S-allyl cysteine levels, and toxicity. *Eur J Cancer Prev.* 2001;10(3):257-63.
64. Baker F PD, Blackwood S, Hunt J, Erskine M, Dyas M, Ashby M, Siva A, Brown MJ. . Blinded comparison of folic acid and placebo in patients with ischaemic heart disease: an outcome trial. . *Circulation.* . 2002;106((suppl II):741).
65. Chapuy MC, Pamphile R, Paris E, Kempf C, Schlichting M, Arnaud S, et al. Combined calcium and vitamin D3 supplementation in elderly women: confirmation of reversal of secondary hyperparathyroidism and hip fracture risk: the Decalyos II study. *Osteoporos Int.* 2002;13(3):257-64.
66. Chylack LT, Jr., Brown NP, Bron A, Hurst M, Kopcke W, Thien U, et al. The Roche European American Cataract Trial (REACT): a randomized clinical trial to investigate the efficacy of an oral antioxidant micronutrient mixture to slow progression of age-related cataract. *Ophthalmic Epidemiol.* 2002;9(1):49-80.

67. Graat JM, Schouten EG, Kok FJ. Effect of daily vitamin E and multivitamin-mineral supplementation on acute respiratory tract infections in elderly persons: a randomized controlled trial. *Jama*. 2002;288(6):715-21.
68. Hodis HN, Mack WJ, LaBree L, Mahrer PR, Sevanian A, Liu CR, et al. Alpha-tocopherol supplementation in healthy individuals reduces low-density lipoprotein oxidation but not atherosclerosis: the Vitamin E Atherosclerosis Prevention Study (VEAPS). *Circulation*. 2002;106(12):1453-9.
69. MRC/BHF Heart Protection Study of antioxidant vitamin supplementation in 20,536 high-risk individuals: a randomised placebo-controlled trial. *Lancet*. 2002;360(9326):23-33.
70. Meyer HE, Smedshaug GB, Kvaavik E, Falch JA, Tverdal A, Pedersen JI. Can vitamin D supplementation reduce the risk of fracture in the elderly? A randomized controlled trial. *J Bone Miner Res*. 2002;17(4):709-15.
71. Schnyder G, Roffi M, Flammer Y, Pin R, Hess OM. Effect of homocysteine-lowering therapy with folic acid, vitamin B12, and vitamin B6 on clinical outcome after percutaneous coronary intervention: the Swiss Heart study: a randomized controlled trial. *Jama*. 2002;288(8):973-9.
72. Waters DD, Alderman EL, Hsia J, Howard BV, Cobb FR, Rogers WJ, et al. Effects of hormone replacement therapy and antioxidant vitamin supplements on coronary atherosclerosis in postmenopausal women: a randomized controlled trial. *Jama*. 2002;288(19):2432-40.
73. Wluka AE, Stuckey S, Brand C, Cicuttini FM. Supplementary vitamin E does not affect the loss of cartilage volume in knee osteoarthritis: a 2 year double blind randomized placebo controlled study. *J Rheumatol*. 2002;29(12):2585-91.
74. Collins EG, Edwin Langbein W, Orebaugh C, Bammert C, Hanson K, Reda D, et al. PoleStriding exercise and vitamin E for management of peripheral vascular disease. *Med Sci Sports Exerc*. 2003;35(3):384-93.
75. Cooper L, Clifton-Bligh PB, Nery ML, Figtree G, Twigg S, Hibbert E, et al. Vitamin D supplementation and bone mineral density in early postmenopausal women. *Am J Clin Nutr*. 2003;77(5):1324-9.
76. Liem A, Reynierse-Buitenwerf GH, Zwinderman AH, Jukema JW, van Veldhuisen DJ. Secondary prevention with folic acid: effects on clinical outcomes. *J Am Coll Cardiol*. 2003;41(12):2105-13.
77. Righetti M, Ferrario GM, Milani S, Serbelloni P, La Rosa L, Uccellini M, et al. Effects of folic acid treatment on homocysteine levels and vascular disease in hemodialysis patients. *Med Sci Monit*. 2003;9(4):Pi19-24.
78. Trivedi DP, Doll R, Khaw KT. Effect of four monthly oral vitamin D3 (cholecalciferol) supplementation on fractures and mortality in men and women living in the community: randomised double blind controlled trial. *Bmj*. 2003;326(7387):469.
79. Virtamo J, Pietinen P, Huttunen JK, Korhonen P, Malila N, Virtanen MJ, et al. Incidence of cancer and mortality following alpha-tocopherol and beta-carotene supplementation: a postintervention follow-up. *Jama*. 2003;290(4):476-85.
80. Dukas L, Bischoff HA, Lindpaintner LS, Schacht E, Birkner-Binder D, Damm TN, et al. Alfacalcidol reduces the number of fallers in a community-dwelling elderly population with a minimum calcium intake of more than 500 mg daily. *J Am Geriatr Soc*. 2004;52(2):230-6.
81. Harwood RH, Sahota O, Gaynor K, Masud T, Hosking DJ. A randomised, controlled comparison of different calcium and vitamin D supplementation regimens in elderly women after hip fracture: The Nottingham Neck of Femur (NONOF) Study. *Age Ageing*. 2004;33(1):45-51.
82. Coburn JW, Maung HM, Elangovan L, Germain MJ, Lindberg JS, Sprague SM, et al. Doxercalciferol safely suppresses PTH levels in patients with secondary hyperparathyroidism associated with chronic kidney disease stages 3 and 4. *Am J Kidney Dis*. 2004;43(5):877-90.

83. Lange H, Suryapranata H, De Luca G, Borner C, Dille J, Kallmayer K, et al. Folate therapy and in-stent restenosis after coronary stenting. *N Engl J Med*. 2004;350(26):2673-81.
84. Larsen ER, Mosekilde L, Foldspang A. Vitamin D and calcium supplementation prevents osteoporotic fractures in elderly community dwelling residents: a pragmatic population-based 3-year intervention study. *J Bone Miner Res*. 2004;19(3):370-8.
85. Liem AH, van Boven AJ, Veeger NJ, Withagen AJ, Robles de Medina RM, Tijssen JG, et al. Efficacy of folic acid when added to statin therapy in patients with hypercholesterolemia following acute myocardial infarction: a randomised pilot trial. *Int J Cardiol*. 2004;93(2-3):175-9.
86. Taylor AJ, Sullenberger LE, Lee HJ, Lee JK, Grace KA. Arterial Biology for the Investigation of the Treatment Effects of Reducing Cholesterol (ARBITER) 2: a double-blind, placebo-controlled study of extended-release niacin on atherosclerosis progression in secondary prevention patients treated with statins. *Circulation*. 2004;110(23):3512-7.
87. Tornwall ME, Virtamo J, Korhonen PA, Virtanen MJ, Taylor PR, Albanes D, et al. Effect of alpha-tocopherol and beta-carotene supplementation on coronary heart disease during the 6-year post-trial follow-up in the ATBC study. *Eur Heart J*. 2004;25(13):1171-8.
88. Manuel-y-Keenoy B, Vinckx M, Vertommen J, van Gaal L, de Leeuw I. Impact of vitamin E supplementation on lipoprotein peroxidation and composition in type 1 diabetic patients treated with atorvastatin. *Atherosclerosis*. 2004;175(2):369-76.
89. McNeil JJ, Robman L, Tikellis G, Sinclair MI, McCarty CA, Taylor HR. Vitamin E supplementation and cataract: randomized controlled trial. *Ophthalmology*. 2004;111(1):75-84.
90. Meier C, Woitge HW, Witte K, Lemmer B, Seibel MJ. Supplementation with oral vitamin D3 and calcium during winter prevents seasonal bone loss: a randomized controlled open-label prospective trial. *J Bone Miner Res*. 2004;19(8):1221-30.
91. Meydani SN, Leka LS, Fine BC, Dallal GE, Keusch GT, Singh MF, et al. Vitamin E and respiratory tract infections in elderly nursing home residents: a randomized controlled trial. *Jama*. 2004;292(7):828-36.
92. Aloia JF, Talwar SA, Pollack S, Yeh J. A randomized controlled trial of vitamin D3 supplementation in African American women. *Arch Intern Med*. 2005;165(14):1618-23.
93. Avenell A, Campbell MK, Cook JA, Hannaford PC, Kilonzo MM, McNeill G, et al. Effect of multivitamin and multimineral supplements on morbidity from infections in older people (MAVIS trial): pragmatic, randomised, double blind, placebo controlled trial. *Bmj*. 2005;331(7512):324-9.
94. Brazier M, Grados F, Kamel S, Mathieu M, Morel A, Maamer M, et al. Clinical and laboratory safety of one year's use of a combination calcium + vitamin D tablet in ambulatory elderly women with vitamin D insufficiency: results of a multicenter, randomized, double-blind, placebo-controlled study. *Clin Ther*. 2005;27(12):1885-93.
95. Flicker L, MacInnis RJ, Stein MS, Scherer SC, Mead KE, Nowson CA, et al. Should older people in residential care receive vitamin D to prevent falls? Results of a randomized trial. *J Am Geriatr Soc*. 2005;53(11):1881-8.
96. Graf M, Ecker D, Horowski R, Kramer B, Riederer P, Gerlach M, et al. High dose vitamin E therapy in amyotrophic lateral sclerosis as add-on therapy to riluzole: results of a placebo-controlled double-blind study. *J Neural Transm (Vienna)*. 2005;112(5):649-60.
97. Grant AM, Avenell A, Campbell MK, McDonald AM, MacLennan GS, McPherson GC, et al. Oral vitamin D3 and calcium for secondary prevention of low-trauma fractures in elderly people (Randomised Evaluation of Calcium Or vitamin D, RECORD): a randomised placebo-controlled trial. *Lancet*. 2005;365(9471):1621-8.

98. Lee IM, Cook NR, Gaziano JM, Gordon D, Ridker PM, Manson JE, et al. Vitamin E in the primary prevention of cardiovascular disease and cancer: the Women's Health Study: a randomized controlled trial. *Jama*. 2005;294(1):56-65.
99. Limburg PJ, Wei W, Ahnen DJ, Qiao Y, Hawk ET, Wang G, et al. Randomized, placebo-controlled, esophageal squamous cell cancer chemoprevention trial of selenomethionine and celecoxib. *Gastroenterology*. 2005;129(3):863-73.
100. Lonn E, Bosch J, Yusuf S, Sheridan P, Pogue J, Arnold JM, et al. Effects of long-term vitamin E supplementation on cardiovascular events and cancer: a randomized controlled trial. *Jama*. 2005;293(11):1338-47.
101. Mooney LA, Madsen AM, Tang D, Orjuela MA, Tsai WY, Garduno ER, et al. Antioxidant vitamin supplementation reduces benzo(a)pyrene-DNA adducts and potential cancer risk in female smokers. *Cancer Epidemiol Biomarkers Prev*. 2005;14(1):237-42.
102. Petersen RC, Thomas RG, Grundman M, Bennett D, Doody R, Ferris S, et al. Vitamin E and donepezil for the treatment of mild cognitive impairment. *N Engl J Med*. 2005;352(23):2379-88.
103. Porthouse J, Cockayne S, King C, Saxon L, Steele E, Aspray T, et al. Randomised controlled trial of calcium and supplementation with cholecalciferol (vitamin D3) for prevention of fractures in primary care. *Bmj*. 2005;330(7498):1003.
104. Potena L, Grigioni F, Magnani G, Ortolani P, Coccolo F, Sassi S, et al. Homocysteine-lowering therapy and early progression of transplant vasculopathy: a prospective, randomized, IVUS-based study. *Am J Transplant*. 2005;5(9):2258-64.
105. Sato Y, Iwamoto J, Kanoko T, Satoh K. Low-dose vitamin D prevents muscular atrophy and reduces falls and hip fractures in women after stroke: a randomized controlled trial. *Cerebrovasc Dis*. 2005;20(3):187-92.
106. Bairati I, Meyer F, Jobin E, Gelinias M, Fortin A, Nabid A, et al. Antioxidant vitamins supplementation and mortality: a randomized trial in head and neck cancer patients. *Int J Cancer*. 2006;119(9):2221-4.
107. Bona KH, Njolstad I, Ueland PM, Schirmer H, Tverdal A, Steigen T, et al. Homocysteine lowering and cardiovascular events after acute myocardial infarction. *N Engl J Med*. 2006;354(15):1578-88.
108. Coyne D, Acharya M, Qiu P, Abboud H, Batlle D, Rosansky S, et al. Paricalcitol capsule for the treatment of secondary hyperparathyroidism in stages 3 and 4 CKD. *Am J Kidney Dis*. 2006;47(2):263-76.
109. Daly RM, Brown M, Bass S, Kukuljan S, Nowson C. Calcium- and vitamin D3-fortified milk reduces bone loss at clinically relevant skeletal sites in older men: a 2-year randomized controlled trial. *J Bone Miner Res*. 2006;21(3):397-405.
110. Law M, Withers H, Morris J, Anderson F. Vitamin D supplementation and the prevention of fractures and falls: results of a randomised trial in elderly people in residential accommodation. *Age Ageing*. 2006;35(5):482-6.
111. Lonn E, Yusuf S, Arnold MJ, Sheridan P, Pogue J, Micks M, et al. Homocysteine lowering with folic acid and B vitamins in vascular disease. *N Engl J Med*. 2006;354(15):1567-77.
112. Magliano D, McNeil J, Branley P, Shiel L, Demos L, Wolfe R, et al. The Melbourne Atherosclerosis Vitamin E Trial (MAVET): a study of high dose vitamin E in smokers. *Eur J Cardiovasc Prev Rehabil*. 2006;13(3):341-7.
113. Schleithoff SS, Zittermann A, Tenderich G, Berthold HK, Stehle P, Koerfer R. Vitamin D supplementation improves cytokine profiles in patients with congestive heart failure: a double-blind, randomized, placebo-controlled trial. *Am J Clin Nutr*. 2006;83(4):754-9.

114. Stranges S, Marshall JR, Trevisan M, Natarajan R, Donahue RP, Combs GF, et al. Effects of selenium supplementation on cardiovascular disease incidence and mortality: secondary analyses in a randomized clinical trial. *Am J Epidemiol.* 2006;163(8):694-9.
115. Zoungas S, McGrath BP, Branley P, Kerr PG, Muske C, Wolfe R, et al. Cardiovascular morbidity and mortality in the Atherosclerosis and Folic Acid Supplementation Trial (ASFAST) in chronic renal failure: a multicenter, randomized, controlled trial. *J Am Coll Cardiol.* 2006;47(6):1108-16.
116. Bolton-Smith C, McMurdo ME, Paterson CR, Mole PA, Harvey JM, Fenton ST, et al. Two-year randomized controlled trial of vitamin K1 (phylloquinone) and vitamin D3 plus calcium on the bone health of older women. *J Bone Miner Res.* 2007;22(4):509-19.
117. Catalano M, Born G, Peto R. Prevention of serious vascular events by aspirin amongst patients with peripheral arterial disease: randomized, double-blind trial. *J Intern Med.* 2007;261(3):276-84.
118. Cole BF, Baron JA, Sandler RS, Haile RW, Ahnen DJ, Bresalier RS, et al. Folic acid for the prevention of colorectal adenomas: a randomized clinical trial. *Jama.* 2007;297(21):2351-9.
119. Cook NR, Albert CM, Gaziano JM, Zaharris E, MacFadyen J, Danielson E, et al. A randomized factorial trial of vitamins C and E and beta carotene in the secondary prevention of cardiovascular events in women: results from the Women's Antioxidant Cardiovascular Study. *Arch Intern Med.* 2007;167(15):1610-8.
120. Durga J, van Boxtel MP, Schouten EG, Kok FJ, Jolles J, Katan MB, et al. Effect of 3-year folic acid supplementation on cognitive function in older adults in the FACIT trial: a randomised, double blind, controlled trial. *Lancet.* 2007;369(9557):208-16.
121. Jamison RL, Hartigan P, Kaufman JS, Goldfarb DS, Warren SR, Guarino PD, et al. Effect of homocysteine lowering on mortality and vascular disease in advanced chronic kidney disease and end-stage renal disease: a randomized controlled trial. *Jama.* 2007;298(10):1163-70.
122. Lappe JM, Travers-Gustafson D, Davies KM, Recker RR, Heaney RP. Vitamin D and calcium supplementation reduces cancer risk: results of a randomized trial. *Am J Clin Nutr.* 2007;85(6):1586-91.
123. Liu BA, McGeer A, McArthur MA, Simor AE, Aghdassi E, Davis L, et al. Effect of multivitamin and mineral supplementation on episodes of infection in nursing home residents: a randomized, placebo-controlled study. *J Am Geriatr Soc.* 2007;55(1):35-42.
124. Lyons RA, Johansen A, Brophy S, Newcombe RG, Phillips CJ, Lervy B, et al. Preventing fractures among older people living in institutional care: a pragmatic randomised double blind placebo controlled trial of vitamin D supplementation. *Osteoporos Int.* 2007;18(6):811-8.
125. Plummer M, Vivas J, Lopez G, Bravo JC, Peraza S, Carillo E, et al. Chemoprevention of precancerous gastric lesions with antioxidant vitamin supplementation: a randomized trial in a high-risk population. *J Natl Cancer Inst.* 2007;99(2):137-46.
126. Smith H, Anderson F, Raphael H, Maslin P, Crozier S, Cooper C. Effect of annual intramuscular vitamin D on fracture risk in elderly men and women--a population-based, randomized, double-blind, placebo-controlled trial. *Rheumatology (Oxford).* 2007;46(12):1852-7.
127. Bjorkman M, Sorva A, Risteli J, Tilvis R. Vitamin D supplementation has minor effects on parathyroid hormone and bone turnover markers in vitamin D-deficient bedridden older patients. *Age Ageing.* 2008;37(1):25-31.
128. Bolland MJ, Barber PA, Doughty RN, Mason B, Horne A, Ames R, et al. Vascular events in healthy older women receiving calcium supplementation: randomised controlled trial. *Bmj.* 2008;336(7638):262-6.
129. Maraini G, Williams SL, Sperduto RD, Ferris F, Milton RC, Clemons TE, et al. A randomized, double-masked, placebo-controlled clinical trial of multivitamin supplementation for age-related



- lens opacities. Clinical trial of nutritional supplements and age-related cataract report no. 3. *Ophthalmology*. 2008;115(4):599-607.e1.
130. Ebbing M, Bleie O, Ueland PM, Nordrehaug JE, Nilsen DW, Vollset SE, et al. Mortality and cardiovascular events in patients treated with homocysteine-lowering B vitamins after coronary angiography: a randomized controlled trial. *Jama*. 2008;300(7):795-804.
  131. Guyton JR, Brown BG, Fazio S, Polis A, Tomassini JE, Tershakovec AM. Lipid-altering efficacy and safety of ezetimibe/simvastatin coadministered with extended-release niacin in patients with type IIa or type IIb hyperlipidemia. *J Am Coll Cardiol*. 2008;51(16):1564-72.
  132. Logan RF, Grainge MJ, Shepherd VC, Armitage NC, Muir KR. Aspirin and folic acid for the prevention of recurrent colorectal adenomas. *Gastroenterology*. 2008;134(1):29-38.
  133. Milman U, Blum S, Shapira C, Aronson D, Miller-Lotan R, Anbinder Y, et al. Vitamin E supplementation reduces cardiovascular events in a subgroup of middle-aged individuals with both type 2 diabetes mellitus and the haptoglobin 2-2 genotype: a prospective double-blinded clinical trial. *Arterioscler Thromb Vasc Biol*. 2008;28(2):341-7.
  134. Prince RL, Austin N, Devine A, Dick IM, Bruce D, Zhu K. Effects of ergocalciferol added to calcium on the risk of falls in elderly high-risk women. *Arch Intern Med*. 2008;168(1):103-8.
  135. Reid IR, Ames R, Mason B, Reid HE, Bacon CJ, Bolland MJ, et al. Randomized controlled trial of calcium supplementation in healthy, nonosteoporotic, older men. *Archives of internal medicine*. 2008;168(20):2276-82.
  136. Sesso HD, Buring JE, Christen WG, Kurth T, Belanger C, MacFadyen J, et al. Vitamins E and C in the prevention of cardiovascular disease in men: the Physicians' Health Study II randomized controlled trial. *Jama*. 2008;300(18):2123-33.
  137. Zhu K, Devine A, Dick IM, Wilson SG, Prince RL. Effects of calcium and vitamin D supplementation on hip bone mineral density and calcium-related analytes in elderly ambulatory Australian women: a five-year randomized controlled trial. *J Clin Endocrinol Metab*. 2008;93(3):743-9.
  138. Anker SD, Comin Colet J, Filippatos G, Willenheimer R, Dickstein K, Drexler H, et al. Ferric carboxymaltose in patients with heart failure and iron deficiency. *N Engl J Med*. 2009;361(25):2436-48.
  139. Hodis HN, Mack WJ, Dustin L, Mahrer PR, Azen SP, Detrano R, et al. High-dose B vitamin supplementation and progression of subclinical atherosclerosis: a randomized controlled trial. *Stroke*. 2009;40(3):730-6.
  140. Imasa MS, Gomez NT, Nevado JB, Jr. Folic acid-based intervention in non-ST elevation acute coronary syndromes. *Asian Cardiovasc Thorac Ann*. 2009;17(1):13-21.
  141. LaCroix AZ, Kotchen J, Anderson G, Brzyski R, Cauley JA, Cummings SR, et al. Calcium plus vitamin D supplementation and mortality in postmenopausal women: the Women's Health Initiative calcium-vitamin D randomized controlled trial. *J Gerontol A Biol Sci Med Sci*. 2009;64(5):559-67.
  142. Lippman SM, Klein EA, Goodman PJ, Lucia MS, Thompson IM, Ford LG, et al. Effect of selenium and vitamin E on risk of prostate cancer and other cancers: the Selenium and Vitamin E Cancer Prevention Trial (SELECT). *Jama*. 2009;301(1):39-51.
  143. Saposnik G, Ray JG, Sheridan P, McQueen M, Lonn E. Homocysteine-lowering therapy and stroke risk, severity, and disability: additional findings from the HOPE 2 trial. *Stroke*. 2009;40(4):1365-72.
  144. Sang ZC, Wang F, Zhou Q, Li YH, Li YG, Wang HP, et al. Combined use of extended-release niacin and atorvastatin: safety and effects on lipid modification. *Chin Med J (Engl)*. 2009;122(14):1615-20.

145. Wu K, Platz EA, Willett WC, Fuchs CS, Selhub J, Rosner BA, et al. A randomized trial on folic acid supplementation and risk of recurrent colorectal adenoma. *Am J Clin Nutr.* 2009;90(6):1623-31.
146. Armitage JM, Bowman L, Clarke RJ, Wallendszus K, Bulbulia R, Rahimi K, et al. Effects of homocysteine-lowering with folic acid plus vitamin B12 vs placebo on mortality and major morbidity in myocardial infarction survivors: a randomized trial. *Jama.* 2010;303(24):2486-94.
147. Chailurkit LO, Saetung S, Thakkestian A, Ongphiphadhanakul B, Rajatanavin R. Discrepant influence of vitamin D status on parathyroid hormone and bone mass after two years of calcium supplementation. *Clin Endocrinol (Oxf).* 2010;73(2):167-72.
148. de Zeeuw D, Agarwal R, Amdahl M, Audhya P, Coyne D, Garimella T, et al. Selective vitamin D receptor activation with paricalcitol for reduction of albuminuria in patients with type 2 diabetes (VITAL study): a randomised controlled trial. *Lancet.* 2010;376(9752):1543-51.
149. Galan P, Kesse-Guyot E, Czernichow S, Briancon S, Blacher J, Hercberg S. Effects of B vitamins and omega 3 fatty acids on cardiovascular diseases: a randomised placebo controlled trial. *Bmj.* 2010;341:c6273.
150. Heinz J, Kropf S, Domrose U, Westphal S, Borucki K, Luley C, et al. B vitamins and the risk of total mortality and cardiovascular disease in end-stage renal disease: results of a randomized controlled trial. *Circulation.* 2010;121(12):1432-8.
151. Hercberg S, Kesse-Guyot E, Druesne-Pecollo N, Touvier M, Favier A, Latino-Martel P, et al. Incidence of cancers, ischemic cardiovascular diseases and mortality during 5-year follow-up after stopping antioxidant vitamins and minerals supplements: a postintervention follow-up in the SU.VI.MAX Study. *Int J Cancer.* 2010;127(8):1875-81.
152. House AA, Eliasziw M, Cattran DC, Churchill DN, Oliver MJ, Fine A, et al. Effect of B-vitamin therapy on progression of diabetic nephropathy: a randomized controlled trial. *Jama.* 2010;303(16):1603-9.
153. Janssen HC, Samson MM, Verhaar HJ. Muscle strength and mobility in vitamin D-insufficient female geriatric patients: a randomized controlled trial on vitamin D and calcium supplementation. *Aging Clin Exp Res.* 2010;22(1):78-84.
154. Salovaara K, Tuppurainen M, Karkkainen M, Rikkinen T, Sandini L, Sirola J, et al. Effect of vitamin D(3) and calcium on fracture risk in 65- to 71-year-old women: a population-based 3-year randomized, controlled trial--the OSTPRE-FPS. *J Bone Miner Res.* 2010;25(7):1487-95.
155. Sanders KM, Stuart AL, Williamson EJ, Simpson JA, Kotowicz MA, Young D, et al. Annual high-dose oral vitamin D and falls and fractures in older women: a randomized controlled trial. *Jama.* 2010;303(18):1815-22.
156. Sanyal AJ, Chalasani N, Kowdley KV, McCullough A, Diehl AM, Bass NM, et al. Pioglitazone, vitamin E, or placebo for nonalcoholic steatohepatitis. *N Engl J Med.* 2010;362(18):1675-85.
157. B vitamins in patients with recent transient ischaemic attack or stroke in the VITamins TO Prevent Stroke (VITATOPS) trial: a randomised, double-blind, parallel, placebo-controlled trial. *Lancet Neurol.* 2010;9(9):855-65.
158. Boden WE, Probstfield JL, Anderson T, Chaitman BR, Desvignes-Nickens P, Koprowicz K, et al. Niacin in patients with low HDL cholesterol levels receiving intensive statin therapy. *N Engl J Med.* 2011;365(24):2255-67.
159. Cherniack EP, Florez HJ, Hollis BW, Roos BA, Troen BR, Levis S. The response of elderly veterans to daily vitamin D3 supplementation of 2,000 IU: a pilot efficacy study. *J Am Geriatr Soc.* 2011;59(2):286-90.
160. Grimnes G, Figenschau Y, Almas B, Jorde R. Vitamin D, insulin secretion, sensitivity, and lipids: results from a case-control study and a randomized controlled trial using hyperglycemic clamp technique. *Diabetes.* 2011;60(11):2748-57.

161. Lewis JR, Calver J, Zhu K, Flicker L, Prince RL. Calcium supplementation and the risks of atherosclerotic vascular disease in older women: results of a 5-year RCT and a 4.5-year follow-up. *J Bone Miner Res.* 2011;26(1):35-41.
162. Gallagher JC, Sai A, Templin T, 2nd, Smith L. Dose response to vitamin D supplementation in postmenopausal women: a randomized trial. *Ann Intern Med.* 2012;156(6):425-37.
163. Marshall JR, Tangen CM, Sakr WA, Wood DP, Jr., Berry DL, Klein EA, et al. Phase III trial of selenium to prevent prostate cancer in men with high-grade prostatic intraepithelial neoplasia: SWOG S9917. *Cancer Prev Res (Phila).* 2011;4(11):1761-9.
164. Alvarez JA, Law J, Coakley KE, Zughaier SM, Hao L, Shahid Salles K, et al. High-dose cholecalciferol reduces parathyroid hormone in patients with early chronic kidney disease: a pilot, randomized, double-blind, placebo-controlled trial. *Am J Clin Nutr.* 2012;96(3):672-9.
165. Glendenning P, Zhu K, Inderjeeth C, Howat P, Lewis JR, Prince RL. Effects of three-monthly oral 150,000 IU cholecalciferol supplementation on falls, mobility, and muscle strength in older postmenopausal women: a randomized controlled trial. *J Bone Miner Res.* 2012;27(1):170-6.
166. Lehouck A, Mathieu C, Carremans C, Baeke F, Verhaegen J, Van Eldere J, et al. High doses of vitamin D to reduce exacerbations in chronic obstructive pulmonary disease: a randomized trial. *Ann Intern Med.* 2012;156(2):105-14.
167. Ma JL, Zhang L, Brown LM, Li JY, Shen L, Pan KF, et al. Fifteen-year effects of Helicobacter pylori, garlic, and vitamin treatments on gastric cancer incidence and mortality. *J Natl Cancer Inst.* 2012;104(6):488-92.
168. Punthakee Z, Bosch J, Dagenais G, Diaz R, Holman R, Probstfield J, et al. Design, history and results of the Thiazolidinedione Intervention with vitamin D Evaluation (TIDE) randomised controlled trial. *Diabetologia.* 2012;55(1):36-45.
169. Sesso HD, Christen WG, Bubes V, Smith JP, MacFadyen J, Schvartz M, et al. Multivitamins in the prevention of cardiovascular disease in men: the Physicians' Health Study II randomized controlled trial. *Jama.* 2012;308(17):1751-60.
170. Delanaye P, Weekers L, Warling X, Moonen M, Smelten N, Medart L, et al. Cholecalciferol in haemodialysis patients: a randomized, double-blind, proof-of-concept and safety study. *Nephrol Dial Transplant.* 2013;28(7):1779-86.
171. Hewitt NA, O'Connor AA, O'Shaughnessy DV, Elder GJ. Effects of cholecalciferol on functional, biochemical, vascular, and quality of life outcomes in hemodialysis patients. *Clin J Am Soc Nephrol.* 2013;8(7):1143-9.
172. Lamas GA, Boineau R, Goertz C, Mark DB, Rosenberg Y, Stylianou M, et al. Oral high-dose multivitamins and minerals after myocardial infarction: a randomized trial. *Ann Intern Med.* 2013;159(12):797-805.
173. Manning PJ, Sutherland WH, Williams SM, Walker RJ, Berry EA, De Jong SA, et al. The effect of lipoic acid and vitamin E therapies in individuals with the metabolic syndrome. *Nutr Metab Cardiovasc Dis.* 2013;23(6):543-9.
174. Prentice RL, Pettinger MB, Jackson RD, Wactawski-Wende J, Lacroix AZ, Anderson GL, et al. Health risks and benefits from calcium and vitamin D supplementation: Women's Health Initiative clinical trial and cohort study. *Osteoporos Int.* 2013;24(2):567-80.
175. Witham MD, Price RJ, Struthers AD, Donnan PT, Messow CM, Ford I, et al. Cholecalciferol treatment to reduce blood pressure in older patients with isolated systolic hypertension: the VitDISH randomized controlled trial. *JAMA Intern Med.* 2013;173(18):1672-9.
176. Witham MD, Dove FJ, Khan F, Lang CC, Belch JJ, Struthers AD. Effects of vitamin D supplementation on markers of vascular function after myocardial infarction--a randomised controlled trial. *Int J Cardiol.* 2013;167(3):745-9.

177. Landray MJ, Haynes R, Hopewell JC, Parish S, Aung T, Tomson J, et al. Effects of extended-release niacin with laropirant in high-risk patients. *N Engl J Med*. 2014;371(3):203-12.
178. Wang AY, Fang F, Chan J, Wen YY, Qing S, Chan IH, et al. Effect of paricalcitol on left ventricular mass and function in CKD--the OPERA trial. *J Am Soc Nephrol*. 2014;25(1):175-86.
179. van Wijngaarden JP, Swart KM, Enneman AW, Dhonukshe-Rutten RA, van Dijk SC, Ham AC, et al. Effect of daily vitamin B-12 and folic acid supplementation on fracture incidence in elderly individuals with an elevated plasma homocysteine concentration: B-PROOF, a randomized controlled trial. *Am J Clin Nutr*. 2014;100(6):1578-86.
180. Wang L, Sesso HD, Glynn RJ, Christen WG, Bubes V, Manson JE, et al. Vitamin E and C supplementation and risk of cancer in men: posttrial follow-up in the Physicians' Health Study II randomized trial. *Am J Clin Nutr*. 2014;100(3):915-23.
181. Huo Y, Li J, Qin X, Huang Y, Wang X, Gottesman RF, et al. Efficacy of folic acid therapy in primary prevention of stroke among adults with hypertension in China: the CSPPT randomized clinical trial. *Jama*. 2015;313(13):1325-35.
182. Ponikowski P, van Veldhuisen DJ, Comin-Colet J, Ertl G, Komajda M, Mareev V, et al. Beneficial effects of long-term intravenous iron therapy with ferric carboxymaltose in patients with symptomatic heart failure and iron deficiency. *Eur Heart J*. 2015;36(11):657-68.
183. Wang LL, H. Zhou, Y. Jin, L. Liu, J. Low-dose B vitamins supplementation ameliorates cardiovascular risk: a double-blind randomized controlled trial in healthy Chinese elderly. *Eur J Nutr*. 2015;54(3):455-64.
184. van Dijk SC, Enneman AW, Swart KM, van Wijngaarden JP, Ham AC, Brouwer-Brolsma EM, et al. Effects of 2-year vitamin B12 and folic acid supplementation in hyperhomocysteinemic elderly on arterial stiffness and cardiovascular outcomes within the B-PROOF trial. *J Hypertens*. 2015;33(9):1897-906; discussion 906.
185. Gupta A, Prabhakar S, Modi M, Bhadada SK, Kalaivani M, Lal V, et al. Effect of Vitamin D and calcium supplementation on ischaemic stroke outcome: a randomised controlled open-label trial. *Int J Clin Pract*. 2016;70(9):764-70.
186. Lappe J, Watson P, Travers-Gustafson D, Recker R, Garland C, Gorham E, et al. Effect of Vitamin D and Calcium Supplementation on Cancer Incidence in Older Women: A Randomized Clinical Trial. *Jama*. 2017;317(12):1234-43.
187. Brox J, Olausson K, Osterud B, Elvevoll EO, Bjornstad E, Brattebog G, et al. A long-term seal- and cod-liver-oil supplementation in hypercholesterolemic subjects. *Lipids*. 2001;36(1):7-13.
188. Feagan BG, Sandborn WJ, Mittmann U, Bar-Meir S, D'Haens G, Bradette M, et al. Omega-3 free fatty acids for the maintenance of remission in Crohn disease: the EPIC Randomized Controlled Trials. *Jama*. 2008;299(14):1690-7.
189. Nye ER, Ablett MB, Robertson MC, Ilesley CDJ, Sutherland WHF. Effect of eicosapentaenoic acid on restenosis rate, clinical course and blood lipids in patients after percutaneous transluminal coronary angioplasty. *Australian and New Zealand Journal of Medicine*. 1990;20(4):549-52.
190. Chen JS, Hill CL, Lester S, Ruediger CD, Battersby R, Jones G, et al. Supplementation with omega-3 fish oil has no effect on bone mineral density in adults with knee osteoarthritis: a 2-year randomized controlled trial. *Osteoporos Int*. 2016;27(5):1897-905.
191. Pasternak RC, Brown LE, Stone PH, Silverman DI, Gibson CM, Sacks FM. Effect of combination therapy with lipid-reducing drugs in patients with coronary heart disease and "normal" cholesterol levels. A randomized, placebo-controlled trial. Harvard Atherosclerosis Reversibility Project (HARP) Study Group. *Ann Intern Med*. 1996;125(7):529-40.
192. Nigam A, Talajic M, Roy D, Nattel S, Lambert J, Nozza A, et al. Fish oil for the reduction of atrial fibrillation recurrence, inflammation, and oxidative stress. *J Am Coll Cardiol*. 2014;64(14):1441-8.

193. Berson EL, Rosner B, Sandberg MA, Weigel-DiFranco C, Moser A, Brockhurst RJ, et al. Clinical trial of docosahexaenoic acid in patients with retinitis pigmentosa receiving vitamin A treatment. *Arch Ophthalmol*. 2004;122(9):1297-305.
194. Garbagnati F, Cairella G, De Martino A, Multari M, Scognamiglio U, Venturiero V, et al. Is antioxidant and n-3 supplementation able to improve functional status in poststroke patients? Results from the Nutristroke Trial. *Cerebrovasc Dis*. 2009;27(4):375-83.
195. Zhang YP, Miao R, Li Q, Wu T, Ma F. Effects of DHA Supplementation on Hippocampal Volume and Cognitive Function in Older Adults with Mild Cognitive Impairment: A 12-Month Randomized, Double-Blind, Placebo-Controlled Trial. *J Alzheimers Dis*. 2017;55(2):497-507.
196. Bates D, Cartlidge NE, French JM, Jackson MJ, Nightingale S, Shaw DA, et al. A double-blind controlled trial of long chain n-3 polyunsaturated fatty acids in the treatment of multiple sclerosis. *J Neurol Neurosurg Psychiatry*. 1989;52(1):18-22.
197. Derosa G, Cicero AF, D'Angelo A, Borghi C, Maffioli P. Effects of n-3 pufas on fasting plasma glucose and insulin resistance in patients with impaired fasting glucose or impaired glucose tolerance. *Biofactors*. 2016;42(3):316-22.
198. Kumar S, Sutherland F, Stevenson I, Lee JM, Garg ML, Sparks PB. Effects of long-term omega-3 polyunsaturated fatty acid supplementation on paroxysmal atrial tachyarrhythmia burden in patients with implanted pacemakers: results from a prospective randomised study. *Int J Cardiol*. 2013;168(4):3812-7.
199. Baldassarre D, Amato M, Eligini S, Barbieri SS, Mussoni L, Frigerio B, et al. Effect of n-3 fatty acids on carotid atherosclerosis and haemostasis in patients with combined hyperlipoproteinemia: A double-blind pilot study in primary prevention. *Annals of Medicine*. 2006;38(5):367-75.
200. Tuttle KR, Shuler LA, Packard DP, Milton JE, Daratha KB, Bibus DM, et al. Comparison of low-fat versus Mediterranean-style dietary intervention after first myocardial infarction (from The Heart Institute of Spokane Diet Intervention and Evaluation Trial). *Am J Cardiol*. 2008;101(11):1523-30.
201. von Schacky C, Angerer P, Kothny W, Theisen K, Mudra H. The effect of dietary omega-3 fatty acids on coronary atherosclerosis. A randomized, double-blind, placebo-controlled trial. *Ann Intern Med*. 1999;130(7):554-62.
202. Shinto L, Quinn J, Montine T, Dodge HH, Woodward W, Baldauf-Wagner S, et al. A randomized placebo-controlled pilot trial of omega-3 fatty acids and alpha lipoic acid in Alzheimer's disease. *J Alzheimers Dis*. 2014;38(1):111-20.
203. Tokudome S, Kuriki K, Yokoyama Y, Sasaki M, Joh T, Kamiya T, et al. Dietary n-3/long-chain n-3 polyunsaturated fatty acids for prevention of sporadic colorectal tumors: a randomized controlled trial in polypectomized participants. *Prostaglandins Leukot Essent Fatty Acids*. 2015;94:1-11.
204. Doi M, Nosaka K, Miyoshi T, Iwamoto M, Kajiya M, Okawa K, et al. Early eicosapentaenoic acid treatment after percutaneous coronary intervention reduces acute inflammatory responses and ventricular arrhythmias in patients with acute myocardial infarction: a randomized, controlled study. *Int J Cardiol*. 2014;176(3):577-82.
205. Souied EH, Delcourt C, Querques G, Bassols A, Merle B, Zourdani A, et al. Oral docosahexaenoic acid in the prevention of exudative age-related macular degeneration: the Nutritional AMD Treatment 2 study. *Ophthalmology*. 2013;120(8):1619-31.
206. Macchia A, Grancelli H, Varini S, Nul D, Laffaye N, Mariani J, et al. Omega-3 fatty acids for the prevention of recurrent symptomatic atrial fibrillation: results of the FORWARD (Randomized Trial to Assess Efficacy of PUFA for the Maintenance of Sinus Rhythm in Persistent Atrial Fibrillation) trial. *J Am Coll Cardiol*. 2013;61(4):463-8.

207. Nodari S, Triggiani M, Campia U, Manerba A, Milesi G, Cesana BM, et al. Effects of n-3 polyunsaturated fatty acids on left ventricular function and functional capacity in patients with dilated cardiomyopathy. *J Am Coll Cardiol.* 2011;57(7):870-9.
208. Brouwer IA, Raitt MH, Dullemeijer C, Kraemer DF, Zock PL, Morris C, et al. Effect of fish oil on ventricular tachyarrhythmia in three studies in patients with implantable cardioverter defibrillators. *Eur Heart J.* 2009;30(7):820-6.
209. Mehmet Özyaydın DE, Şenol Tayyar, Bayram Ali Uysal, Abdullah Doğan, Atilla İçli, Emel Özkan1,, Ercan Varol YT, Akif Arslan. N-3 polyunsaturated fatty acids administration does not reduce the recurrence rates of atrial fibrillation and inflammation after electrical cardioversion: a prospective randomized study. *The Anatolian Journal of Cardiology; Istanbul.* 2011;11(4):305-9.
210. Harrison RA, Elton PJ. Is there a role for long-chain omega3 or oil-rich fish in the treatment of atrial fibrillation? *Med Hypotheses.* 2005;64(1):59-63.
211. Eritsland J, Arnesen H, Gronseth K, Fjeld NB, Abdelnoor M. Effect of dietary supplementation with n-3 fatty acids on coronary artery bypass graft patency. *Am J Cardiol.* 1996;77(1):31-6.
212. Brouwer IA, Zock PL, Camm AJ, Bocker D, Hauer RN, Wever EF, et al. Effect of fish oil on ventricular tachyarrhythmia and death in patients with implantable cardioverter defibrillators: the Study on Omega-3 Fatty Acids and Ventricular Arrhythmia (SOFA) randomized trial. *Jama.* 2006;295(22):2613-9.
213. Dangour AD, Allen E, Elbourne D, Fasey N, Fletcher AE, Hardy P, et al. Effect of 2-y n-3 long-chain polyunsaturated fatty acid supplementation on cognitive function in older people: a randomized, double-blind, controlled trial. *Am J Clin Nutr.* 2010;91(6):1725-32.
214. Nilsen DW, Albrektsen G, Landmark K, Moen S, Aarsland T, Woie L. Effects of a high-dose concentrate of n-3 fatty acids or corn oil introduced early after an acute myocardial infarction on serum triacylglycerol and HDL cholesterol. *Am J Clin Nutr.* 2001;74(1):50-6.
215. Quinn JF, Raman R, Thomas RG, Yurko-Mauro K, Nelson EB, Van Dyck C, et al. Docosahexaenoic acid supplementation and cognitive decline in Alzheimer disease: a randomized trial. *Jama.* 2010;304(17):1903-11.
216. Leaf A, Albert CM, Josephson M, Steinhaus D, Kluger J, Kang JX, et al. Prevention of fatal arrhythmias in high-risk subjects by fish oil n-3 fatty acid intake. *Circulation.* 2005;112(18):2762-8.
217. Einvik G, Klemsdal TO, Sandvik L, Hjerkin EM. A randomized clinical trial on n-3 polyunsaturated fatty acids supplementation and all-cause mortality in elderly men at high cardiovascular risk. *Eur J Cardiovasc Prev Rehabil.* 2010;17(5):588-92.
218. Andrieu S, Guyonnet S, Coley N, Cantet C, Bonnefoy M, Bordes S, et al. Effect of long-term omega 3 polyunsaturated fatty acid supplementation with or without multidomain intervention on cognitive function in elderly adults with memory complaints (MAPT): a randomised, placebo-controlled trial. *Lancet Neurol.* 2017;16(5):377-89.
219. Vesin C, Galan P, Gautier B, Czernichow S, Hercberg S, Blacher J. Control of baseline cardiovascular risk factors in the SU-FOL-OM3 study cohort: does the localization of the arterial event matter? *Eur J Cardiovasc Prev Rehabil.* 2010;17(5):541-8.
220. Galan P, Briancon S, Blacher J, Czernichow S, Hercberg S. The SU.FOL.OM3 Study: a secondary prevention trial testing the impact of supplementation with folate and B-vitamins and/or Omega-3 PUFA on fatal and non fatal cardiovascular events, design, methods and participants characteristics. *Trials.* 2008;9:35.
221. Burr ML, Fehily AM, Gilbert JF, Rogers S, Holliday RM, Sweetnam PM, et al. Effects of changes in fat, fish, and fibre intakes on death and myocardial reinfarction: diet and reinfarction trial (DART). *Lancet.* 1989;2(8666):757-61.

222. Geleijnse JM, Giltay EJ, Schouten EG, de Goede J, Oude Griep LM, Teitsma-Jansen AM, et al. Effect of low doses of n-3 fatty acids on cardiovascular diseases in 4,837 post-myocardial infarction patients: design and baseline characteristics of the Alpha Omega Trial. *Am Heart J*. 2010;159(4):539-46.e2.
223. Tatsuno I, Saito Y, Kudou K, Ootake J. Long-term safety and efficacy of TAK-085 in Japanese subjects with hypertriglyceridemia undergoing lifestyle modification: the omega-3 fatty acids randomized long-term (ORL) study. *J Clin Lipidol*. 2013;7(6):615-25.
224. Chew EY, Clemons TE, Sangiovanni JP, Danis RP, Ferris FL, 3rd, Elman MJ, et al. Secondary analyses of the effects of lutein/zeaxanthin on age-related macular degeneration progression: AREDS2 report No. 3. *JAMA Ophthalmol*. 2014;132(2):142-9.
225. Danthiir V, Burns NR, Nettelbeck T, Wilson C, Wittert G. The older people, omega-3, and cognitive health (EPOCH) trial design and methodology: a randomised, double-blind, controlled trial investigating the effect of long-chain omega-3 fatty acids on cognitive ageing and wellbeing in cognitively healthy older adults. *Nutr J*. 2011;10:117.
226. Danthiir V, Hosking D, Burns NR, Wilson C, Nettelbeck T, Calvaresi E, et al. Cognitive performance in older adults is inversely associated with fish consumption but not erythrocyte membrane n-3 fatty acids. *J Nutr*. 2014;144(3):311-20.
227. Proudman SM, James MJ, Spargo LD, Metcalf RG, Sullivan TR, Rischmueller M, et al. Fish oil in recent onset rheumatoid arthritis: a randomised, double-blind controlled trial within algorithm-based drug use. *Ann Rheum Dis*. 2015;74(1):89-95.
228. Proudman SM, Cleland LG, Metcalf RG, Sullivan TR, Spargo LD, James MJ. Plasma n-3 fatty acids and clinical outcomes in recent-onset rheumatoid arthritis. *Br J Nutr*. 2015;114(6):885-90.
229. Long-term effects of interventional strategies to prevent cognitive decline in elderly (MAPTPLUS). NCT01513252.
230. Sanyal AJ, Abdelmalek MF, Suzuki A, Cummings OW, Chojkier M. No significant effects of ethyl-eicosapentanoic acid on histologic features of nonalcoholic steatohepatitis in a phase 2 trial. *Gastroenterology*. 2014;147(2):377-84.e1.
231. Burr ML, Ashfield-Watt PA, Dunstan FD, Fehily AM, Breay P, Ashton T, et al. Lack of benefit of dietary advice to men with angina: results of a controlled trial. *Eur J Clin Nutr*. 2003;57(2):193-200.
232. Yokoyama M, Origasa H, Matsuzaki M, Matsuzawa Y, Saito Y, Ishikawa Y, et al. Effects of eicosapentaenoic acid on major coronary events in hypercholesterolaemic patients (JELIS): a randomised open-label, blinded endpoint analysis. *Lancet*. 2007;369(9567):1090-8.
233. Roncaglioni MC, Tombesi M, Avanzini F, Barlera S, Caimi V, Longoni P, et al. n-3 fatty acids in patients with multiple cardiovascular risk factors. *N Engl J Med*. 2013;368(19):1800-8.
234. Bosch J, Gerstein HC, Dagenais GR, Diaz R, Dyal L, Jung H, et al. n-3 fatty acids and cardiovascular outcomes in patients with dysglycemia. *N Engl J Med*. 2012;367(4):309-18.
235. Tavazzi L, Maggioni AP, Marchioli R, Barlera S, Franzosi MG, Latini R, et al. Effect of n-3 polyunsaturated fatty acids in patients with chronic heart failure (the GISSI-HF trial): a randomised, double-blind, placebo-controlled trial. *Lancet*. 2008;372(9645):1223-30.
236. Bates D, Fawcett PR, Shaw DA, Weightman D. Polyunsaturated fatty acids in treatment of acute remitting multiple sclerosis. *Br Med J*. 1978;2(6149):1390-1.
237. Eussen SR, Geleijnse JM, Giltay EJ, Rompelberg CJ, Klungel OH, Kromhout D. Effects of n-3 fatty acids on major cardiovascular events in statin users and non-users with a history of myocardial infarction. *Eur Heart J*. 2012;33(13):1582-8.

238. Geleijnse JM, Giltay EJ, Kromhout D. Effects of n-3 fatty acids on cognitive decline: a randomized, double-blind, placebo-controlled trial in stable myocardial infarction patients. *Alzheimers Dement.* 2012;8(4):278-87.
239. Kromhout D, Giltay EJ, Geleijnse JM. n-3 fatty acids and cardiovascular events after myocardial infarction. *N Engl J Med.* 2010;363(21):2015-26.
240. Rodriguez-Leyva D, Weighell W, Edel AL, LaVallee R, Dibrov E, Pinneker R, et al. Potent antihypertensive action of dietary flaxseed in hypertensive patients. *Hypertension.* 2013;62(6):1081-9.
241. Bemelmans WJ, Broer J, Feskens EJ, Smit AJ, Muskiet FA, Lefrandt JD, et al. Effect of an increased intake of alpha-linolenic acid and group nutritional education on cardiovascular risk factors: the Mediterranean Alpha-linolenic Enriched Groningen Dietary Intervention (MARGARIN) study. *Am J Clin Nutr.* 2002;75(2):221-7.
242. Natvig H, Borchgrevink F, Dedichen J, Owren PA, Schiøtz EH, Westlund K. A Controlled Trial of the Effect of Linolenic Acid on Incidence of Coronary Heart Disease. *Scandinavian Journal of Clinical and Laboratory Investigation.* 1968;21(sup105):1-20.
243. Ros E. Effect of a 1-year walnut supplementation on blood lipids among older individuals: Findings from the walnuts and healthy aging (WAHA) study. *FASEB Journal, The.* 2016;30(1):293.
244. Black HS, Herd JA, Goldberg LH, Wolf JE, Jr., Thornby JI, Rosen T, et al. Effect of a low-fat diet on the incidence of actinic keratosis. *N Engl J Med.* 1994;330(18):1272-5.
245. McIlmurray MB, Turkie W. Controlled trial of gamma linolenic acid in Duke's C colorectal cancer. *Br Med J (Clin Res Ed).* 1987;294(6582):1260.
246. Controlled trial of soya-bean oil in myocardial infarction. *Lancet.* 1968;2(7570):693-9.
247. The National Diet-Heart Study Final Report. *Circulation.* 1968;37(3 Suppl):I1-428.
248. Rose GA, Thomson WB, Williams RT. CORN OIL IN TREATMENT OF ISCHAEMIC HEART DISEASE. *Br Med J.* 1965;1(5449):1531-3.
249. Woodhill JM, Palmer AJ, Leelarthaeapin B, McGilchrist C, Blacket RB. Low fat, low cholesterol diet in secondary prevention of coronary heart disease. *Adv Exp Med Biol.* 1978;109:317-30.
250. Dayton S, Pearce ML. Prevention of coronary heart disease and other complications of arteriosclerosis by modified diet. *Am J Med.* 1969;46(5):751-62.
251. Vijayakumar M, Vasudevan DM, Sundaram KR, Krishnan S, Vaidyanathan K, Nandakumar S, et al. A randomized study of coconut oil versus sunflower oil on cardiovascular risk factors in patients with stable coronary heart disease. *Indian Heart J.* 2016;68(4):498-506.
252. Keen H, Payan J, Allawi J, Walker J, Jamal GA, Weir AI, et al. Treatment of diabetic neuropathy with gamma-linolenic acid. The gamma-Linolenic Acid Multicenter Trial Group. *Diabetes Care.* 1993;16(1):8-15.
253. Houtsmuller AJ, Zahn KJ, Henkes HE. Unsaturated fats and progression of diabetic retinopathy. *Doc Ophthalmol.* 1980;48(2):363-71.
254. Moy TF, Yanek LR, Raqueño JV, Bezirdjian PJ, Blumenthal RS, Wilder LB, et al. Dietary Counseling for High Blood Cholesterol in Families at Risk of Coronary Disease. *Preventive Cardiology.* 2001;4(4):158-64.
255. Ley SJ, Metcalf PA, Scragg RK, Swinburn BA. Long-term effects of a reduced fat diet intervention on cardiovascular disease risk factors in individuals with glucose intolerance. *Diabetes Res Clin Pract.* 2004;63(2):103-12.
256. Leren P. The Oslo diet-heart study. Eleven-year report. *Circulation.* 1970;42(5):935-42.
257. Watts GF, Lewis B, Brunt JN, Lewis ES, Coltart DJ, Smith LD, et al. Effects on coronary artery disease of lipid-lowering diet, or diet plus cholestyramine, in the St Thomas' Atherosclerosis Regression Study (STARS). *Lancet.* 1992;339(8793):563-9.



258. Howard BV, Van Horn L, Hsia J, Manson JE, Stefanick ML, Wassertheil-Smoller S, et al. Low-fat dietary pattern and risk of cardiovascular disease: the Women's Health Initiative Randomized Controlled Dietary Modification Trial. *Jama*. 2006;295(6):655-66.
259. Chlebowski RT, Blackburn GL, Thomson CA, Nixon DW, Shapiro A, Hoy MK, et al. Dietary fat reduction and breast cancer outcome: interim efficacy results from the Women's Intervention Nutrition Study. *J Natl Cancer Inst*. 2006;98(24):1767-76.
260. Ball KP, et al. Low-fat diet in myocardial infarction. A controlled trial. *Lancet*. 1965;2:501-4.
261. MacLennan R, Macrae F, Bain C, Battistutta D, Chapuis P, Gratten H, et al. Randomized trial of intake of fat, fiber, and beta carotene to prevent colorectal adenomas. *J Natl Cancer Inst*. 1995;87(23):1760-6.
262. Hebert JR, Ebbeling CB, Olendzki BC, Hurley TG, Ma Y, Saal N, et al. Change in women's diet and body mass following intensive intervention for early-stage breast cancer. *J Am Diet Assoc*. 2001;101(4):421-31.
263. Appel LJ, Champagne CM, Harsha DW, Cooper LS, Obarzanek E, Elmer PJ, et al. Effects of comprehensive lifestyle modification on blood pressure control: main results of the PREMIER clinical trial. *Jama*. 2003;289(16):2083-93.
264. Hjerkin EM, Abdelnoor M, Breivik L, Bergengen L, Ellingsen I, Seljeflot I, et al. Effect of diet or very long chain omega-3 fatty acids on progression of atherosclerosis, evaluated by carotid plaques, intima-media thickness and by pulse wave propagation in elderly men with hypercholesterolaemia. *Eur J Cardiovasc Prev Rehabil*. 2006;13(3):325-33.
265. Pierce JP, Natarajan L, Caan BJ, Parker BA, Greenberg ER, Flatt SW, et al. Influence of a diet very high in vegetables, fruit, and fiber and low in fat on prognosis following treatment for breast cancer: the Women's Healthy Eating and Living (WHEL) randomized trial. *Jama*. 2007;298(3):289-98.
266. Rose GA, Thomson WB, Williams RT. CORN OIL IN TREATMENT OF ISCHAEMIC HEART DISEASE. *British medical journal*. 1965;1(5449):1531-3.
267. Frantz ID, Jr., Dawson EA, Ashman PL, Gatewood LC, Bartsch GE, Kuba K, et al. Test of effect of lipid lowering by diet on cardiovascular risk. The Minnesota Coronary Survey. *Arteriosclerosis*. 1989;9(1):129-35.
268. Chang HY, Hu YW, Yue CS, Wen YW, Yeh WT, Hsu LS, et al. Effect of potassium-enriched salt on cardiovascular mortality and medical expenses of elderly men. *Am J Clin Nutr*. 2006;83(6):1289-96.
269. Salt substitution: a low-cost strategy for blood pressure control among rural Chinese. A randomized, controlled trial. *J Hypertens*. 2007;25(10):2011-8.
270. Kwok TC, Lam LC, Sea MM, Goggins W, Woo J. A randomized controlled trial of dietetic interventions to prevent cognitive decline in old age hostel residents. *Eur J Clin Nutr*. 2012;66(10):1135-40.
271. Morgan T, Adam W, Gillies A, Wilson M, Morgan G, Carney S. Hypertension treated by salt restriction. *Lancet*. 1978;1(8058):227-30.
272. Whelton PK, Appel LJ, Espeland MA, Applegate WB, Ettinger WH, Jr., Kostis JB, et al. Sodium reduction and weight loss in the treatment of hypertension in older persons: a randomized controlled trial of nonpharmacologic interventions in the elderly (TONE). TONE Collaborative Research Group. *Jama*. 1998;279(11):839-46.
273. Shah M, Jeffery RW, Laing B, Savre SG, Van Natta M, Strickland D. Hypertension Prevention Trial (HPT): food pattern changes resulting from intervention on sodium, potassium, and energy intake. Hypertension Prevention Trial Research Group. *J Am Diet Assoc*. 1990;90(1):69-76.
274. The effects of nonpharmacologic interventions on blood pressure of persons with high normal levels. Results of the Trials of Hypertension Prevention, Phase I. *Jama*. 1992;267(9):1213-20.

275. Effects of weight loss and sodium reduction intervention on blood pressure and hypertension incidence in overweight people with high-normal blood pressure. The Trials of Hypertension Prevention, phase II. The Trials of Hypertension Prevention Collaborative Research Group. *Arch Intern Med.* 1997;157(6):657-67.
276. Estruch R, Ros E, Salas-Salvado J, Covas MI, Corella D, Aros F, et al. Primary Prevention of Cardiovascular Disease with a Mediterranean Diet Supplemented with Extra-Virgin Olive Oil or Nuts. *N Engl J Med.* 2018;378(25):e34.
277. Ng GW, Chan UM, Li PC, Wong WC. Can a Mediterranean diet reduce the effects of lipodystrophy syndrome in people living with HIV? A pilot randomised controlled trial. *Sex Health.* 2011;8(1):43-51.
278. Singh RB, Dubnov G, Niaz MA, Ghosh S, Singh R, Rastogi SS, et al. Effect of an Indo-Mediterranean diet on progression of coronary artery disease in high risk patients (Indo-Mediterranean Diet Heart Study): a randomised single-blind trial. *Lancet.* 2002;360(9344):1455-61.
279. de Lorgeril M, Renaud S, Mamelle N, Salen P, Martin JL, Monjaud I, et al. Mediterranean alpha-linolenic acid-rich diet in secondary prevention of coronary heart disease. *Lancet.* 1994;343(8911):1454-9.
280. Blankenhorn DH, Nessim SA, Johnson RL, Sanmarco ME, Azen SP, Cashin-Hemphill L. Beneficial effects of combined colestipol-niacin therapy on coronary atherosclerosis and coronary venous bypass grafts. *Jama.* 1987;257(23):3233-40.
281. Whitney EJ, Krasuski RA, Personius BE, Michalek JE, Maranian AM, Kolasa MW, et al. A randomized trial of a strategy for increasing high-density lipoprotein cholesterol levels: effects on progression of coronary heart disease and clinical events. *Ann Intern Med.* 2005;142(2):95-104.
282. Manson JE, Cook NR, Lee IM, Christen W, Bassuk SS, Mora S, et al. Vitamin D Supplements and Prevention of Cancer and Cardiovascular Disease. *N Engl J Med.* 2018.
283. Scragg R, Stewart AW, Waayer D, Lawes CMM, Toop L, Sluyter J, et al. Effect of Monthly High-Dose Vitamin D Supplementation on Cardiovascular Disease in the Vitamin D Assessment Study : A Randomized Clinical Trial. *JAMA Cardiol.* 2017;2(6):608-16.
284. Yusuf S, Teo KK, Pogue J, Dyal L, Copland I, Schumacher H, et al. Telmisartan, ramipril, or both in patients at high risk for vascular events. *N Engl J Med.* 2008;358(15):1547-59.
285. Yusuf S, Teo K, Anderson C, Pogue J, Dyal L, Copland I, et al. Effects of the angiotensin-receptor blocker telmisartan on cardiovascular events in high-risk patients intolerant to angiotensin-converting enzyme inhibitors: a randomised controlled trial. *Lancet.* 2008;372(9644):1174-83.
286. Manson JE, Cook NR, Lee IM, Christen W, Bassuk SS, Mora S, et al. Marine n-3 Fatty Acids and Prevention of Cardiovascular Disease and Cancer. *N Engl J Med.* 2018.
287. Bowman L, Mafham M, Wallendszus K, Stevens W, Buck G, Barton J, et al. Effects of n-3 Fatty Acid Supplements in Diabetes Mellitus. *N Engl J Med.* 2018;379(16):1540-50.

# Effects of Nutritional Supplements and Dietary Interventions on Cardiovascular Outcomes

## An Umbrella Review and Evidence Map

Safi U. Khan, MD; Muhammad U. Khan, MD; Haris Riaz, MD; Shahul Valavoor, MD; Di Zhao, PhD; Lauren Vaughan, MD; Victor Okunrintemi, MD, MPH; Irbaz Bin Riaz, MD, MS; Muhammad Shahzeb Khan, MD; Edo Kaluski, MD; M. Hassan Murad, MD; Michael J. Blaha, MD, MPH; Eliseo Guallar, MD, DrPH; and Erin D. Michos, MD, MHS

**Background:** The role of nutritional supplements and dietary interventions in preventing mortality and cardiovascular disease (CVD) outcomes is unclear.

**Purpose:** To examine evidence about the effects of nutritional supplements and dietary interventions on mortality and cardiovascular outcomes in adults.

**Data Sources:** PubMed, CINAHL, and the Cochrane Library from inception until March 2019; ClinicalTrials.gov (10 March 2019); journal Web sites; and reference lists.

**Study Selection:** English-language, randomized controlled trials (RCTs) and meta-analyses of RCTs that assessed the effects of nutritional supplements or dietary interventions on all-cause mortality or cardiovascular outcomes, such as death, myocardial infarction, stroke, and coronary heart disease.

**Data Extraction:** Two independent investigators abstracted data, assessed the quality of evidence, and rated the certainty of evidence.

**Data Synthesis:** Nine systematic reviews and 4 new RCTs were selected that encompassed a total of 277 trials, 24 interventions, and 992 129 participants. A total of 105 meta-analyses were generated. There was moderate-certainty evidence that reduced salt intake decreased the risk for all-cause mortality in normotensive participants (risk ratio [RR], 0.90 [95% CI, 0.85 to 0.95]) and car-

diovascular mortality in hypertensive participants (RR, 0.67 [CI, 0.46 to 0.99]). Low-certainty evidence showed that omega-3 long-chain polyunsaturated fatty acid (LC-PUFA) was associated with reduced risk for myocardial infarction (RR, 0.92 [CI, 0.85 to 0.99]) and coronary heart disease (RR, 0.93 [CI, 0.89 to 0.98]). Folic acid was associated with lower risk for stroke (RR, 0.80 [CI, 0.67 to 0.96]; low certainty), whereas calcium plus vitamin D increased the risk for stroke (RR, 1.17 [CI, 1.05 to 1.30]; moderate certainty). Other nutritional supplements, such as vitamin B<sub>6</sub>, vitamin A, multivitamins, antioxidants, and iron and dietary interventions, such as reduced fat intake, had no significant effect on mortality or cardiovascular disease outcomes (very low- to moderate-certainty evidence).

**Limitations:** Suboptimal quality and certainty of evidence.

**Conclusion:** Reduced salt intake, omega-3 LC-PUFA use, and folate supplementation could reduce risk for some cardiovascular outcomes in adults. Combined calcium plus vitamin D might increase risk for stroke.

**Primary Funding Source:** None.

*Ann Intern Med.* 2019;171:190-198. doi:10.7326/M19-0341

Annals.org

For author affiliations, see end of text.

This article was published at Annals.org on 9 July 2019.

Current U.S. dietary guidelines recommend several healthy eating patterns, including U.S., Mediterranean, and vegetarian diets (1). Although the guidelines recognize the occasional need for nutritional supplementation or food fortification for specific nutrients that may be consumed in inadequate amounts, they do not recommend routine use of any dietary supplement to reduce risk for cardiovascular disease (CVD) or other chronic diseases. Despite these recommendations, most U.S. adults use supplements to enhance their diets, with uncertain health benefits (2, 3). From 1999 to 2012, the NHANES (National Health and Nutrition Examination Survey) reported that 52% of participants used at least 1 and 10% used at least 4 dietary supple-

ments (4). From 2011 to 2014, the NHANES reported that among participants aged 60 years or older, 70% used at least 1 and 29% used at least 4 supplements, and 41% of supplement takers reported that they did so to improve their overall health (5).

In 2013, the U.S. Preventive Services Task Force conducted a systematic review of the utility of vitamin and mineral supplements for CVD prevention and found little evidence to support use (6). More recently, Jenkins and colleagues published a meta-analysis of randomized controlled trials (RCTs) of dietary supplements published through October 2017 (7). They found some stroke benefit conferred by folate; no CVD benefit for multivitamins, vitamin C, vitamin D, or calcium; and evidence for mortality harm for niacin and antioxidants. Since then, several landmark RCTs evaluating the efficacy of fish oils (8-10) and vitamin D (11, 12) for CVD prevention have been published, which add to the evidence level. In addition, the quality of the evidence base of these various nutritional supplements and dietary interventions still needs to be evaluated to ascertain the confidence in their efficacy. Thus, we per-

### See also:

Editorial comment . . . . . 216

Web-Only

Supplement

CME/MOC activity

formed a systematic review of existing meta-analyses of RCTs and generated an evidence map for efficacy of nutritional supplements and dietary interventions for CVD prevention.

## METHODS

### Search Strategy

We used PubMed, CINAHL, and the Cochrane Library from inception to March 2019 to find meta-analyses published in the English language about vitamins, minerals, dietary supplements or products, and dietary interventions using the following search terms: (*\*minerals OR \*vitamins OR \*diet AND \*cardiovascular outcomes*) and (*meta-analy\* OR metaanaly\* OR systematic review\**). After selecting systematic reviews on the basis of a priori criteria, the search timelines of the systematic reviews were reviewed for recency and an updated search for RCTs published in English was performed starting from the end date of searches from selected systematic reviews until March 2019 (Supplement Table 1, available at Annals.org). Additional sources included Web sites of major cardiovascular and medicine journals ([www.onlinejacc.org](http://www.onlinejacc.org); <https://academic.oup.com/eurheartj>; [www.ahajournals.org/journal/circ](http://www.ahajournals.org/journal/circ); [www.nejm.org](http://www.nejm.org); <https://jamanetwork.com>; and <http://annals.org/aim>) and bibliographies of relevant studies. We also searched ClinicalTrials.gov (10 March 2019) to check for publication bias and to identify any new or ongoing trials (Supplement Table 2, available at Annals.org).

### Study Selection

The prespecified inclusion criteria were meta-analyses of RCTs assessing efficacy of nutritional supplements (vitamins, minerals, dietary supplements) or dietary interventions in adult participants ( $\geq 18$  years) that report effect estimates for all-cause mortality and cardiovascular outcomes of interest and were written in English. Because the nutritional and dietary recommendations are universal, there were no restrictions on baseline health status, race, or sex of the participants.

Meta-analyses of observational studies or those reporting efficacy of interventions on surrogate or other outcomes, such as blood pressure, lipid values, inflammatory markers, electrolytes, renal values, or quality-of-life indicators, were excluded. Systematic reviews reporting meta-analyses of both clinical trials and observational studies were reviewed for data related to RCTs only. In case of multiple meta-analyses of the same intervention and outcome, we preferred the most recent, largest, and updated meta-analysis. However, the competing meta-analyses were screened for any additional trials not included in the selected meta-analysis.

After removing duplicates and following the selection criteria, we screened the retrieved articles at the title and abstract level and then at the methods level. The search, selection, and abstraction processes were performed independently by 2 authors (M.U.K. and S.V.). Any discrepancies were resolved by discussion and mutual consensus, referring to the original study or third-party review (S.U.K.).

### Data Extraction, Outcomes, and Quality Assessment

We first extracted information from eligible meta-analyses on first author, journal, year of publication, interventions, outcomes of interest, number of trials, whether an appropriate study search and selection criteria was reported, method of pooling estimates (fixed or random effects), methods of detecting publication bias, measure of heterogeneity, and risk-of-bias assessment. Second, we generated the pool of clinical trials by identifying trials contained in the selected meta-analyses and screening competing meta-analyses for additional trials and trials published after the selected meta-analyses (Supplement Table 3, available at Annals.org). Among new clinical trials for omega-3 long-chain polyunsaturated fatty acid (LC-PUFA) (8–10), we excluded REDUCE-IT (Reduction of Cardiovascular Events With EPA-Intervention Trial) (9) because icosapent ethyl, a highly purified form of eicosapentaenoic acid (EPA), does not qualify as a dietary supplement according to the Dietary Supplement Health and Education Act of 1994 (13). Third, after removing duplicates, we abstracted data on trial name, first author, year, intervention, outcomes, raw events, and sample sizes for each group.

The main outcome of interest was all-cause mortality. The secondary outcomes were cardiovascular mortality, myocardial infarction (MI), stroke, and coronary heart disease (CHD).

Two independent reviewers (V.O. and M.S.K.) assessed the methodological quality of meta-analyses on specific potential factors that may affect the validity of summary estimates—that is, appropriate search and selection criteria, number of trials and participants included, risk-of-bias assessment of included trials, method of pooling the estimates, assessment of publication bias, and degree of heterogeneity (Supplement Table 4, available at Annals.org).

### Data Synthesis and Analysis

We created an evidence map that displays the plausible benefits of each intervention and the certainty of the evidence (14). The certainty of the evidence was evaluated using the GRADE (Grading of Recommendations Assessment, Development and Evaluation) approach (GRADEpro GDT) (<https://gdt.gradeapro.org/app/>) (14) and was classified as high, moderate, low, or very low (Supplement Table 5, available at Annals.org). Two reviewers (V.O. and M.S.K.) performed these assessments under the supervision of a third reviewer (S.U.K.).

Estimates were pooled according to Mantel-Haenszel random-effects model. The Paule-Mandel method was used for reestimating outcomes. Hartung-Knapp small-sample adjustments were applied when the number of studies was less than 10 (15). Effect sizes were reported as risk ratios (RRs) with 95% CIs. We used  $I^2$  statistics to estimate the extent of unexplained heterogeneity;  $I^2$  greater than 50% was considered a high degree of between-study heterogeneity. We calculated the Egger regression test as an estimate of publication

bias for any reanalysis that included at least 10 studies (16).

Statistical analyses were conducted using “meta,” version 4.9-4 (R Project for Statistical Computing). Statistical significance was set at 0.05 for all analyses except for the Egger regression test, which had a threshold less than 0.10 because of the test’s limited statistical power.

### Role of the Funding Source

The study received no funding.

## RESULTS

### Search Results

Of 942 citations, after removing duplicates and screening at the title and abstract level we reviewed 140 full-text articles for eligibility. We excluded 131 articles because they focused on nonrandomized studies, were not relevant, or were outdated, as well as 5 systematic reviews that assessed intake of nuts (17), fruits and vegetables (18), fiber (19), and green or black tea (20) and those focusing on low-carbohydrate and low-fat diets (21) that did not report cardiovascular outcomes of interest. Ultimately, we included 9 systematic reviews and 4 new RCTs for a total of 105 meta-analyses of 24 interventions (277 RCTs, 992 129 partic-

ipants) (7, 22-29) (Figure 1). The interventions evaluated in the meta-analyses included 16 types of supplements (antioxidants,  $\beta$ -carotene, vitamin B complex, multivitamins, selenium, vitamin A, vitamin B<sub>3</sub> or niacin, vitamin B<sub>6</sub>, vitamin C, vitamin E, vitamin D, calcium plus vitamin D, calcium, folic acid, iron, and omega-3 LC-PUFA) and 8 types of dietary interventions (Mediterranean diet and intake of reduced saturated fat, modified dietary fat, reduced dietary fat, reduced salt among hypertensive and normotensive participants, increased omega-3  $\alpha$ -linolenic acid [ALA], and increased omega-6 PUFA) (Supplement Table 6, available at Annals.org).

### Quality Assessment

All included studies were trial-level meta-analyses (7, 22-28), except the study by Mente and colleagues, which was a patient-level analysis of 4 studies (29) (Supplement Table 4). All trial-level systematic reviews reported comprehensive search and selection criteria as well as quality assessment of studies by using the Cochrane Risk of Bias Tool (30). Six systematic reviews primarily used random-effects models for meta-analyses, of which 4 used fixed-effects models for sensitivity analyses. Two studies primarily used fixed-effects models, of which 1 selected a random-effects model only for estimates with an  $I^2$  greater than 50%. Out of all trial-level analyses, only 2 did not assess publication bias, and 1 did not evaluate between-study variance because of the limited number of trials (<10). Eighty-one (77%) meta-analyses included fewer than 10 trials. Thirty-six (34%) meta-analyses included fewer than 84% double-blind RCTs; of these, 3 (2.8%) had a total sample of fewer than 1000 participants, 16 (15%) had  $I^2$  greater than 50%, and 4 (3.8%) had significant publication bias.

### All-Cause Mortality

All 24 interventions assessed the risk for all-cause mortality. Reduced salt intake in normotensive participants was found to reduce risk (RR, 0.90 [95% CI, 0.85 to 0.95];  $P = 0.01$ ;  $I^2 = 0\%$ ; moderate certainty) (Figure 2). Other nutritional supplements or dietary interventions had no association with risk for this outcome. The Egger regression test was consistent with publication bias for omega-3 LC-PUFA ( $P = 0.09$ ) and reduced saturated fat intake for all-cause mortality ( $P = 0.02$ ) (Supplement Table 7, available at Annals.org).

### Cardiovascular Mortality

Twenty-one interventions assessed the risk for cardiovascular mortality. Reduced salt intake in hypertensive participants reduced risk (RR, 0.67 [CI, 0.46 to 0.99];  $P = 0.04$ ;  $I^2 = 0\%$ ; moderate certainty) (Figure 3). Other nutritional supplements or dietary interventions were not associated with risk for this outcome.

### MI

Twenty-one interventions assessed risk for MI. Use of omega-3 LC-PUFA was associated with reduced risk (RR, 0.92 [CI, 0.85 to 0.99];  $P = 0.03$ ;  $I^2 = 1\%$ ; low certainty) (Supplement Figure 1, available at Annals.org). Other nutritional supplements or dietary interventions

Figure 1. Evidence search and selection.

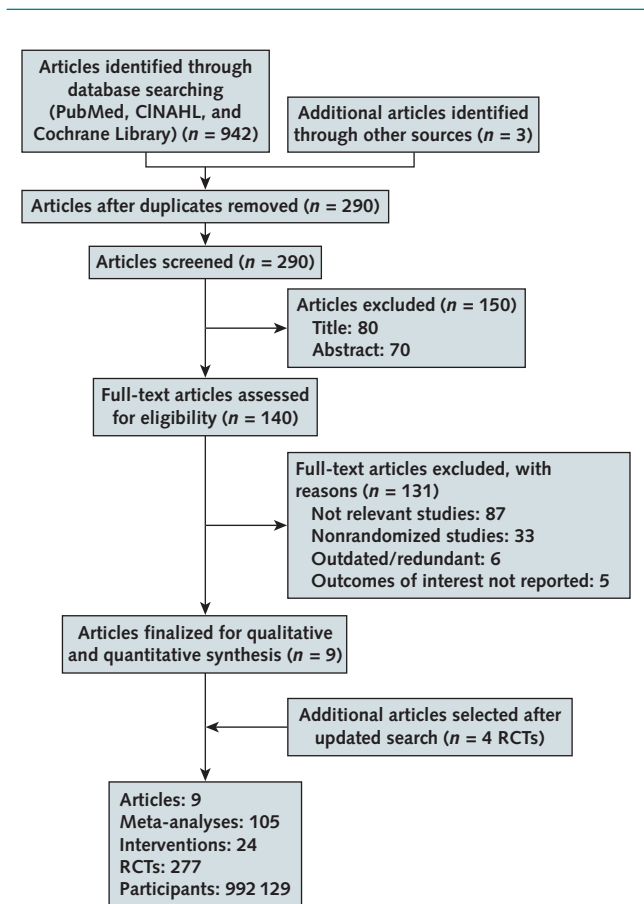

RCT = randomized controlled trial.



**Figure 2.** Effects of nutritional supplements and dietary interventions on all-cause mortality.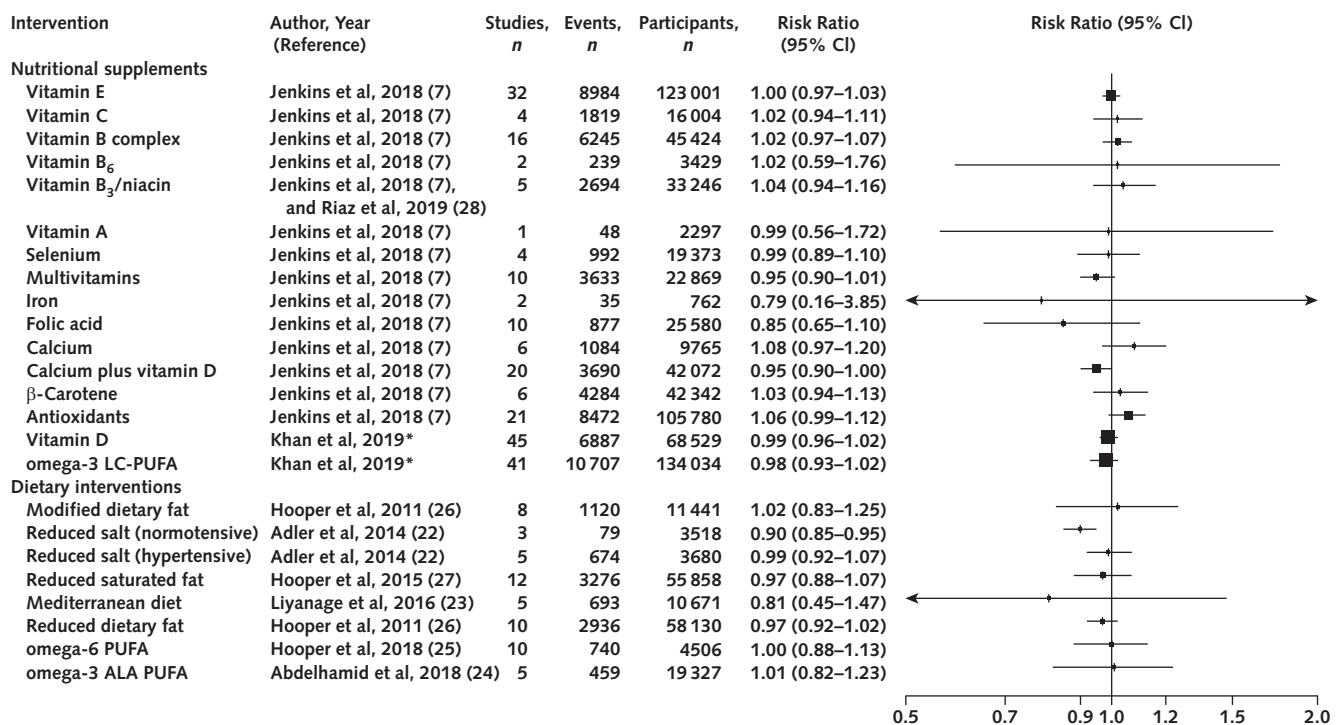

ALA =  $\alpha$ -linolenic acid; LC-PUFA = long-chain polyunsaturated fatty acid.

\* Updated meta-analysis after inclusion of new clinical trials.

had no association with risk for this outcome. The Egger regression test was consistent with publication bias for meta-analyses of vitamin E ( $P = 0.01$ ) (Supplement Table 7).

### Stroke

Twenty interventions assessed the risk for stroke. Folic acid was associated with lower risk (RR, 0.80 [CI, 0.67 to 0.96];  $P = 0.02$ ;  $I^2 = 0\%$ ; low certainty), whereas combined calcium plus vitamin D intake was associated with increased risk (RR, 1.17 [CI, 1.05 to 1.30];  $P = 0.01$ ;  $I^2 = 0\%$ ; moderate certainty) (Supplement Figure 2, available at [Annals.org](http://Annals.org)). Other nutritional supplements or dietary interventions had no association with risk for this outcome. The Egger regression test was consistent with publication bias for meta-analyses of vitamin E ( $P = 0.08$ ) (Supplement Table 7).

### CHD

Nineteen interventions assessed the risk for CHD. Use of omega-3 LC-PUFA was associated with reduced risk (RR, 0.93 [CI, 0.89 to 0.98];  $P = 0.01$ ;  $I^2 = 2\%$ ; low certainty) (Supplement Figure 3, available at [Annals.org](http://Annals.org)). There was no association between other nutritional supplements or dietary interventions with risk for CHD.

### Evidence Map

Figure 4 is an evidence map summarizing the findings for included interventions. There is a paucity of data assessing the effects of vitamin B<sub>6</sub>, vitamin A, mul-

tivitamins, iron, antioxidants, and reduced salt intake on certain cardiovascular end points. The map also shows the lack of significant effects on all-cause mortality and cardiovascular outcomes for most nutritional supplements, that the certainty of evidence varies from very low to low for most of the interventions, and that none of the interventions have high-quality evidence.

## DISCUSSION

In this overview of 24 nutritional supplements and dietary interventions evaluating data from RCTs and meta-analyses of RCTs, we found some evidence that reduced salt intake was protective for all-cause mortality in normotensive participants and cardiovascular mortality in hypertensive participants, that omega-3 LC-PUFA was protective for MI and CHD, and folic acid was protective for stroke. Conversely, combined calcium plus vitamin D intake increased the risk for stroke. Other supplements, such as multivitamins, selenium, vitamin A, vitamin B<sub>6</sub>, vitamin C, vitamin E, vitamin D alone, calcium alone, folic acid, and iron, or such dietary interventions as the Mediterranean diet, reduced saturated fat intake, modified fat intake, reduced dietary fat intake, and increased intake of omega-3 ALA or omega-6 PUFA, did not seem to have a significant effect on mortality or CVD outcomes (with very low- to moderate-certainty evidence).

**Figure 3.** Effects of nutritional supplements and dietary interventions on cardiovascular mortality.

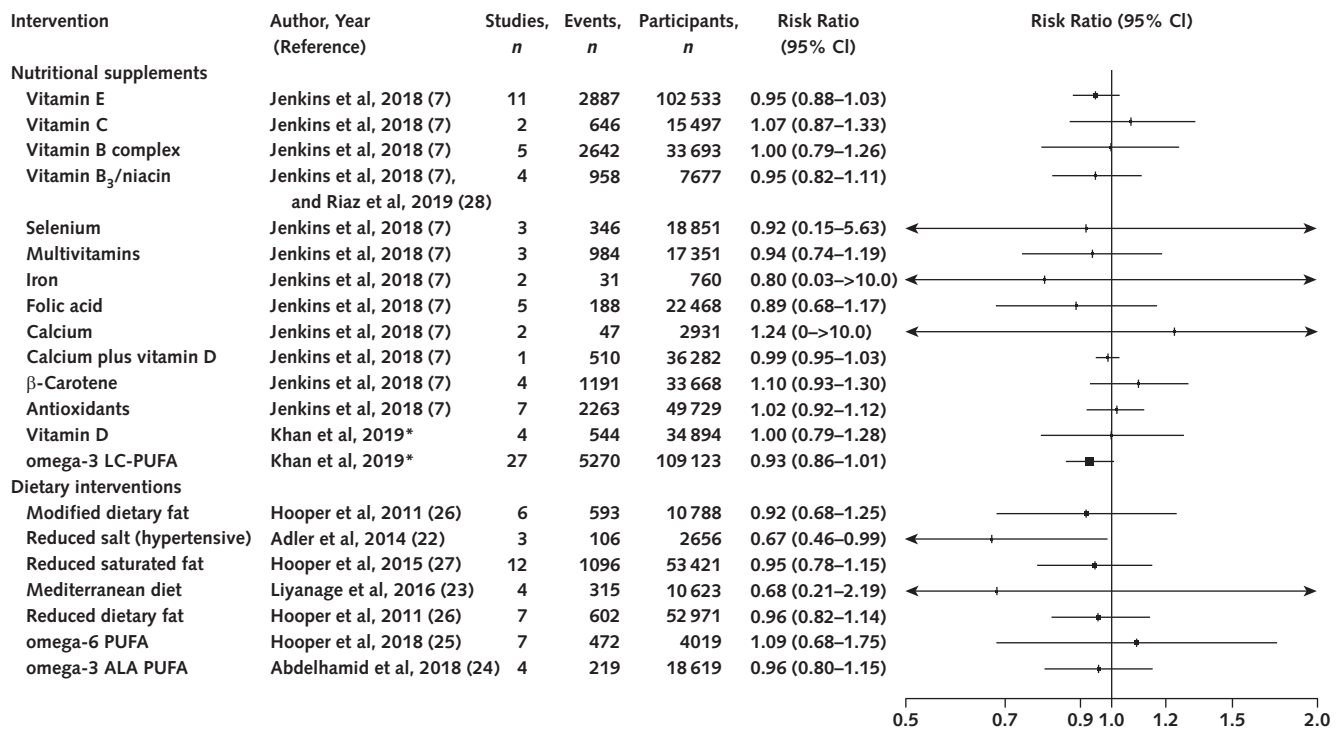

ALA =  $\alpha$ -linolenic acid; LC-PUFA = long-chain polyunsaturated fatty acid.  
 \* Updated meta-analysis after inclusion of new clinical trials.

The beneficial effects of reduced salt intake on mortality and CVD risk reduction remain a debatable issue. Although some data support lower salt intake to reduce CVD risk (31, 32), other studies have shown a U-shaped relationship between sodium intake and death (33–35). Recently, 2 studies explored the relationship between measures of sodium intake, estimated from urinary sodium excretion and death (29, 32). A patient-level study of 4 prospective studies (133 118 participants) concluded that reduced intake of sodium should be confined to hypertensive patients only who also consume high sodium (29). However, Cook and colleagues reported a higher risk for all-cause mortality with increased sodium intake in participants of the TOHP (Trials of Hypertension Prevention) and showed the benefit of reduced sodium intake on death during a period of 20 years (32).

The mechanism behind the benefit of reduced salt intake on death is most likely related to reduced blood pressure. Hypertension is a known risk factor for CVD, and scientific evidence exists of a direct relationship between dietary salt intake and blood pressure (36–38). A meta-analysis of 34 trials (3230 participants) showed that reduction in salt intake (an average of 4.4 g/d) was associated with reduced systolic and diastolic blood pressures in both hypertensive and normotensive patients, regardless of sex or ethnicity (36). This benefit can potentially translate into cardiovascular risk reduction. It was estimated that lowering salt intake to 6 g per day would be associated with a reduction in

systolic blood pressure by about 7 mm Hg and a reduction in diastolic blood pressure by about 4 mm Hg in hypertensive patients and approximately 4 and 2 mm Hg, respectively, in normotensive patients; in turn, this could predict reduction in stroke rates by 24% and CHD by 18% (36, 39).

Clinical trials of omega-3 LC-PUFA have shown conflicting results regarding reduction of cardiovascular outcomes. However, recent randomized data have shown cardiovascular benefits (8–10). Although VITAL (Vitamin D and Omega-3 Trial) (8) and ASCEND (A Study of Cardiovascular Events in Diabetes) (10) did not find convincing evidence of protective effects of omega-3 LC-PUFA for overall cardiovascular benefits (primary outcomes), VITAL did show a benefit of omega-3 LC-PUFA at 1 g per day for the reduction of MI, a secondary outcome (8). Moreover, VITAL showed a 19% reduction in major CVD outcomes among the subgroup of participants with low dietary fish intake (8).

Even more notable was the recent publication of the landmark REDUCE-IT, that found, compared with placebo, a remarkable 25% reduction in cardiovascular end points with the use of icosapent ethyl, a modified and highly purified form of EPA (9). This trial studied a much higher dose of EPA (4 g/d) than previous studies and included high-risk participants (those with known atherosclerotic CVD or diabetes mellitus and at least 1 additional vascular risk factor) who had controlled low-density lipoprotein cholesterol while receiving statin therapy but had elevated triglyceride levels (135 to 499

mg/dL (9). As the cardiovascular risk reduction seen with icosapent ethyl exceeded the anticipated benefits from triglyceride reduction alone, other potential beneficial mechanisms, such as anti-inflammatory or anti-thrombotic effects, have been speculated. Icosapent ethyl is proprietary and is available only by prescription. It is unclear whether the effects observed in REDUCE-IT are specific for icosapent ethyl or reflect use of the higher dose of omega-3 LC-PUFA. The results should thus not be generalized to dietary supplement formulations of omega-3 LC-PUFA, which are unregulated and have variable composition (typically EPA plus docosahexaenoic acid).

Folate supplementation was associated with a lower risk for stroke, but this was largely driven by the results of the CSPPT (China Stroke Primary Prevention Trial), which evaluated the efficacy of folic acid therapy for primary prevention of stroke among hypertensive adults in China (40). This benefit might be due to the lack of folate fortification of foods in China (7), and whether these results can be generalized to a population, such as the United States, which has folate fortification, remains unclear.

On the other hand, we found that combined calcium plus vitamin D supplementation resulted in a higher

risk for stroke. In a reanalysis of the WHI CaD Study (Women's Health Initiative Calcium/Vitamin D Supplementation Study), risk for cardiovascular events, including stroke, was higher in women allocated to calcium plus vitamin D administration who were not taking personal calcium supplements (41). Potential biological explanations are hypercalcemia-mediated vascular calcifications, triggering of atherosclerosis, and hypercoagulability (42, 43). Of note, a recent observational analysis from NHANES found that use of calcium supplements was associated with an increased risk for death from cancer (2). Another analysis found an association with increased risk for MI (44). These findings, along with our findings from RCTs regarding stroke risk, raise concerns about harms from calcium supplement use. Regarding vitamin D alone (without calcium), despite new RCT data from the VITAL (11) and ViDA (Vitamin D Assessment Study) (12) trials, there was no evidence found for benefit or harm for vitamin D supplementation and CVD risk reduction.

Regarding multivitamins, our review was consistent with a previous meta-analysis (3) and supports the statements by the U.S. Preventive Services Task Force in 2014 regarding the lack of adequate evidence to support the benefit of multivitamin supplementation for CVD or death (6, 45). The lack of benefit of dietary sup-

Figure 4. Evidence map of availability and appraisal of certainty of the evidence.

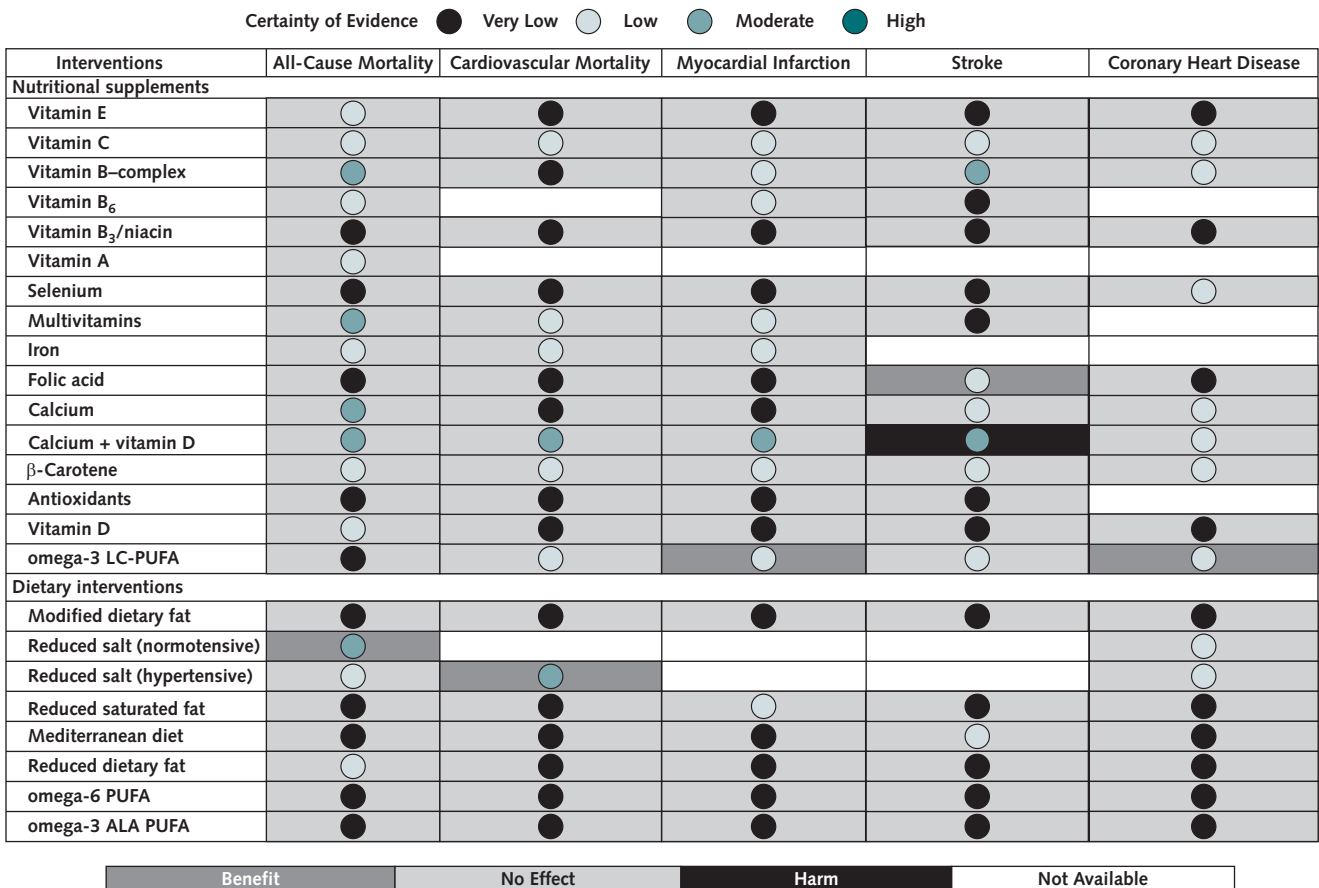

ALA = α-linolenic acid; LC-PUFA = long-chain polyunsaturated fatty acid.



plements on death was also seen in a recent observational study from NHANES (2).

Regarding dietary recommendations from food sources, the American Heart Association (46) and the 2015 to 2020 U.S. dietary guidelines suggest limiting saturated fats and trans fats as a “key recommendation” for promoting a healthy lifestyle. The Mediterranean diet has been shown to be effective in reducing cardiovascular risk (23), but concerns have been raised regarding the methodological validity of some of the RCT studies. For instance, the Indo-Mediterranean study generated considerable controversy because of the lack of trained professionals required to run a trial of scientific validity (47). Similarly, the PREDIMED (Prevencción con Dieta Mediterránea) (48) study was retracted and republished after errors in random assignment were found, although the conclusions were largely unchanged in the reanalysis. In our analysis, the Mediterranean diet, modified dietary fat, reduced dietary fat, reduced saturated fat intake, omega-6 PUFA, or omega-3 ALA PUFA did not reduce the risk for mortality or cardiovascular outcomes.

We compared our results with previous meta-analyses identified in our searches. Graudal and colleagues (274 683 patients) concluded that both low and high salt intake were associated with higher risk for all-cause mortality (35). However, their results were predominantly based on observational studies (23 cohort studies and 2 follow-up studies of RCTs). Conversely, Adler and colleagues showed little evidence for cardiovascular mortality reduction with lowered salt intake among hypertensive patients (RR, 0.67 [CI, 0.45 to 1.01]), which did not achieve statistical significance (22). We included the same clinical trials, but the discrepancy in results may be due to the different analytic approach used in the meta-analyses. Adler and colleagues used a fixed-effects model to analyze the results, whereas our meta-analysis was conducted using a more robust Paule-Mandel estimator with Hartung-Knapp adjustments (15). The same explanation applies to differences in results related to multivitamins and minerals from a recent meta-analysis by Jenkins and colleagues (7), except for folic acid, where we are in accord with Jenkins and colleagues' findings. Abdelhamid and colleagues suggested benefit of omega-3 LC-PUFA in reducing CHD risk (RR, 0.93 [CI, 0.88 to 0.97]) but found no statistically significant effect on MI (24). Another meta-analysis by Aung and colleagues (10 RCTs, 77 917 participants) showed that omega-3 LC-PUFA supplementation was not associated with prevention of fatal CHD or CVD events (49). Our analysis is updated with recent data through March 2019, which explains the difference in results for omega-3 LC-PUFA compared with earlier reviews (8, 10, 24, 49). Regarding the higher risk for stroke due to combined calcium plus vitamin D, our results are consistent with a previous meta-analysis (41).

Our study's strengths included using data only from RCTs and their meta-analyses, considering both dietary interventions and dietary supplements, and incorporating new trial data published in 2018 and 2019

after prior meta-analyses. The U.S. Department of Health and Human Services and the U.S. Department of Agriculture have been criticized for the paucity of sound scientific background behind their dietary recommendations (50). Similarly, the U.S. Preventive Services Task Force report has not been updated since 2014 (45). Our review provides a direct quantitative comparison of various nutritional and dietary interventions for cardiovascular outcomes. Because our generated evidence map is derived from RCTs, this report can assist to cover the “evidence-free zone” in this field (50).

Nevertheless, our findings need to be considered in the context of certain limitations. There are inherent limitations secondary to the shortcomings of included meta-analyses and RCTs (that is, heterogeneity of baseline characteristics of the participants, including age, sex, health and socioeconomic status, and interventions; lack of dose-response analyses; and variable duration of follow-up). Because the focus of our study was to provide broad-based evidence for various nutritional supplements and dietary interventions using existing meta-analyses and trial-level information, we could not analyze interventions according to important subgroups, such as sex, body mass index, lipid values, blood pressure thresholds, diabetes, and history of CVD. Various meta-analyses pooled a smaller number of trials, leading to the risk for small-study effects (51), and were limited by trials that were not double blind, lacked robust methods of pooling estimates, and had publication bias. Using the GRADE system, we found that the certainty of evidence was generally low or very low. Issues related to precision of the estimates, indirectness, quantitative and qualitative heterogeneity, and publication bias resulted in generally low-quality evidence.

In summary, this overview of the efficacy of nutritional supplements and dietary interventions on mortality and cardiovascular outcomes found evidence that supports reduced salt intake, omega-3 LC-PUFA intake, and folate supplementation for CVD risk reduction. Conversely, combined calcium plus vitamin D showed an increased risk for stroke. Other vitamins, minerals, dietary supplements, and dietary interventions were not associated with survival or cardiovascular benefits. Overall, these findings are limited by suboptimal quality of the evidence. This study can help those who create professional cardiovascular and dietary guidelines modify their recommendations, provide the evidence base for clinicians to discuss dietary supplements with their patients, and guide new studies to fulfill the evidence gap.

From West Virginia University, Morgantown, West Virginia (S.U.K., M.U.K., S.V.); Cleveland Clinic, Cleveland, Ohio (H.R.); Johns Hopkins Bloomberg School of Public Health, Baltimore, Maryland (D.Z.); East Carolina University, Greenville, North Carolina (L.V., V.O.); Mayo Clinic, Rochester, Minnesota (I.B.R., M.H.M.); John H. Stroger, Jr. Hospital of Cook County, Chicago, Illinois (M.S.K.); Guthrie Robert Packer Hospital, Sayre, Pennsylvania (E.K.); Johns Hopkins School of Medicine, Baltimore, Maryland (M.J.B.); Johns Hopkins Bloomberg School of

Public Health and Johns Hopkins School of Medicine, Baltimore, Maryland (E.G.); and Johns Hopkins School of Medicine and Johns Hopkins Bloomberg School of Public Health, Baltimore, Maryland (E.D.M.).

**Financial Support:** Drs. Zhao, Guallar, and Michos are funded by the Blumenthal Scholars Fund in Preventive Cardiology at Johns Hopkins University.

**Disclosures:** Dr. Blaha reports grants from the National Heart, Lung, and Blood Institute, the Food and Drug Administration, the American Heart Association, Amgen, and the Aetna Foundation and personal fees from the Food and Drug Administration, Amgen, Sanofi, Novartis, Novo Nordisk, and Bayer outside the submitted work. Authors not named here have disclosed no conflicts of interest. Disclosures can also be viewed at [www.acponline.org/authors/icmje/ConflictOfInterestForms.do?msNum=M19-0341](http://www.acponline.org/authors/icmje/ConflictOfInterestForms.do?msNum=M19-0341).

**Corresponding Author:** Safi U. Khan, MD, West Virginia University, 1 Medical Center Drive, Morgantown, WV 26505; e-mail, [safinmc@gmail.com](mailto:safinmc@gmail.com).

Current author addresses and author contributions are available at [Annals.org](http://Annals.org).

## References

- DeSalvo KB, Olson R, Casavale KO. Dietary guidelines for Americans. *JAMA*. 2016;315:457-8. [PMID: 26746707] doi:10.1001/jama.2015.18396
- Chen F, Du M, Blumberg JB, et al. Association among dietary supplement use, nutrient intake, and mortality among U.S. adults. A cohort study. *Ann Intern Med*. 2019. [PMID: 30959527] doi:10.7326/M18-2478
- Kim J, Choi J, Kwon SY, et al. Association of multivitamin and mineral supplementation and risk of cardiovascular disease: a systematic review and meta-analysis. *Circ Cardiovasc Qual Outcomes*. 2018;11:e004224. [PMID: 29991644] doi:10.1161/CIRCOUTCOMES.117.004224
- Kantor ED, Rehm CD, Du M, et al. Trends in dietary supplement use among US adults from 1999-2012. *JAMA*. 2016;316:1464-74. [PMID: 27727382] doi:10.1001/jama.2016.14403
- Gahche JJ, Bailey RL, Potischman N, et al. Dietary supplement use was very high among older adults in the United States in 2011-2014. *J Nutr*. 2017;147:1968-76. [PMID: 28855421] doi:10.3945/jn.117.255984
- Fortmann SP, Burda BU, Senger CA, et al. Vitamin and mineral supplements in the primary prevention of cardiovascular disease and cancer. An updated systematic evidence review for the U.S. Preventive Services Task Force. *Ann Intern Med*. 2013;159:824-34. [PMID: 24217421]
- Jenkins DJA, Spence JD, Giovannucci EL, et al. Supplemental vitamins and minerals for CVD prevention and treatment. *J Am Coll Cardiol*. 2018;71:2570-84. [PMID: 29852980] doi:10.1016/j.jacc.2018.04.020
- Manson JE, Cook NR, Lee IM, et al; VITAL Research Group. Marine n-3 fatty acids and prevention of cardiovascular disease and cancer. *N Engl J Med*. 2019;380:23-32. [PMID: 30415637] doi:10.1056/NEJMoa1811403
- Bhatt DL, Steg PG, Miller M, et al; REDUCE-IT Investigators. Cardiovascular risk reduction with icosapent ethyl for hypertriglyceridemia. *N Engl J Med*. 2019;380:11-22. [PMID: 30415628] doi:10.1056/NEJMoa1812792
- Bowman L, Mafham M, Wallendszus K, et al; ASCEND Study Collaborative Group. Effects of n-3 fatty acid supplements in diabetes mellitus. *N Engl J Med*. 2018;379:1540-50. [PMID: 30146932] doi:10.1056/NEJMoa1804989
- Manson JE, Cook NR, Lee IM, et al; VITAL Research Group. Vitamin D supplements and prevention of cancer and cardiovascular disease. *N Engl J Med*. 2019;380:33-44. [PMID: 30415629] doi:10.1056/NEJMoa1809944
- Scragg R, Stewart AW, Waayer D, et al. Effect of monthly high-dose vitamin D supplementation on cardiovascular disease in the Vitamin D Assessment Study: a randomized clinical trial. *JAMA Cardiol*. 2017;2:608-16. [PMID: 28384800] doi:10.1001/jamacardio.2017.0175
- Dodge T, Litt D, Kaufman A. Influence of the Dietary Supplement Health and Education Act on consumer beliefs about the safety and effectiveness of dietary supplements. *J Health Commun*. 2011;16:230-44. [PMID: 21120738] doi:10.1080/10810730.2010.529493
- Farah WH, Alsawas M, Mainou M, et al. Non-pharmacological treatment of depression: a systematic review and evidence map. *Evid Based Med*. 2016;21:214-21. [PMID: 27836921] doi:10.1136/ebmed-2016-110522
- Veroniki AA, Jackson D, Viechtbauer W, et al. Methods to estimate the between-study variance and its uncertainty in meta-analysis. *Res Synth Methods*. 2016;7:55-79. [PMID: 26332144] doi:10.1002/jrsm.1164
- Egger M, Smith GD, Schneider M, et al. Bias in meta-analysis detected by a simple, graphical test. *BMJ*. 1997;315:629-34. [PMID: 9310563]
- Martin N, Germanò R, Hartley L, et al. Nut consumption for the primary prevention of cardiovascular disease. *Cochrane Database Syst Rev*. 2015:CD011583. [PMID: 26411417] doi:10.1002/14651858.CD011583.pub2
- Hartley L, Igbinedion E, Holmes J, et al. Increased consumption of fruit and vegetables for the primary prevention of cardiovascular diseases. *Cochrane Database Syst Rev*. 2013:CD009874. [PMID: 23736950] doi:10.1002/14651858.CD009874.pub2
- Hartley L, May MD, Loveman E, et al. Dietary fibre for the primary prevention of cardiovascular disease. *Cochrane Database Syst Rev*. 2016:CD011472. [PMID: 26758499] doi:10.1002/14651858.CD011472.pub2
- Hartley L, Flowers N, Holmes J, et al. Green and black tea for the primary prevention of cardiovascular disease. *Cochrane Database Syst Rev*. 2013:CD009934. [PMID: 23780706] doi:10.1002/14651858.CD009934.pub2
- Mansoor N, Vinknes KJ, Veierød MB, et al. Effects of low-carbohydrate diets v. low-fat diets on body weight and cardiovascular risk factors: a meta-analysis of randomised controlled trials. *Br J Nutr*. 2016;115:466-79. [PMID: 26768850] doi:10.1017/S0007114515004699
- Adler AJ, Taylor F, Martin N, et al. Reduced dietary salt for the prevention of cardiovascular disease. *Cochrane Database Syst Rev*. 2014:CD009217. [PMID: 25519688] doi:10.1002/14651858.CD009217.pub3
- Liyanage T, Ninomiya T, Wang A, et al. Effects of the Mediterranean diet on cardiovascular outcomes: a systematic review and meta-analysis. *PLoS One*. 2016;11:e0159252. [PMID: 27509006] doi:10.1371/journal.pone.0159252
- Abdelhamid AS, Brown TJ, Brainard JS, et al. Omega-3 fatty acids for the primary and secondary prevention of cardiovascular disease. *Cochrane Database Syst Rev*. 2018;11:CD003177. [PMID: 30521670] doi:10.1002/14651858.CD003177.pub4
- Hooper L, Al-Khudairy L, Abdelhamid AS, et al. Omega-6 fats for the primary and secondary prevention of cardiovascular disease. *Cochrane Database Syst Rev*. 2018;7:CD011094. [PMID: 30019765] doi:10.1002/14651858.CD011094.pub3
- Hooper L, Summerbell CD, Thompson R, et al. Reduced or modified dietary fat for preventing cardiovascular disease. *Cochrane Database Syst Rev*. 2011:CD002137. [PMID: 21735388] doi:10.1002/14651858.CD002137.pub2
- Hooper L, Martin N, Abdelhamid A, et al. Reduction in saturated fat intake for cardiovascular disease. *Cochrane Data-*

- base Syst Rev. 2015;CD011737. [PMID: 26068959] doi:10.1002/14651858.CD011737
28. Riaz H, Khan SU, Rahman H, et al. Effects of high-density lipoprotein targeting treatments on cardiovascular outcomes: a systematic review and meta-analysis. *Eur J Prev Cardiol.* 2019;26:533-43. [PMID: 30861690] doi:10.1177/2047487318816495
29. Mente A, O'Donnell M, Rangarajan S, et al; PURE, EPIDREAM and ONTARGET/TRANSCEND Investigators. Associations of urinary sodium excretion with cardiovascular events in individuals with and without hypertension: a pooled analysis of data from four studies. *Lancet.* 2016;388:465-75. [PMID: 27216139] doi:10.1016/S0140-6736(16)30467-6
30. Higgins JP, Altman DG, Gøtzsche PC, et al; Cochrane Bias Methods Group. The Cochrane Collaboration's tool for assessing risk of bias in randomised trials. *BMJ.* 2011;343:d5928. [PMID: 22008217] doi:10.1136/bmj.d5928
31. Cook NR, Appel LJ, Whelton PK. Lower levels of sodium intake and reduced cardiovascular risk. *Circulation.* 2014;129:981-9. [PMID: 24415713] doi:10.1161/CIRCULATIONAHA.113.006032
32. Cook NR, Appel LJ, Whelton PK. Sodium intake and all-cause mortality over 20 years in the Trials of Hypertension Prevention. *J Am Coll Cardiol.* 2016;68:1609-17. [PMID: 27712772] doi:10.1016/j.jacc.2016.07.745
33. O'Donnell M, Mente A, Rangarajan S, et al; PURE Investigators. Urinary sodium and potassium excretion, mortality, and cardiovascular events. *N Engl J Med.* 2014;371:612-23. [PMID: 25119607] doi:10.1056/NEJMoa1311889
34. Kalogeropoulos AP, Georgiopoulou VV, Murphy RA, et al. Dietary sodium content, mortality, and risk for cardiovascular events in older adults: the Health, Aging, and Body Composition (Health ABC) Study. *JAMA Intern Med.* 2015;175:410-9. [PMID: 25599120] doi:10.1001/jamainternmed.2014.6278
35. Graudal N, Jürgens G, Baslund B, et al. Compared with usual sodium intake, low- and excessive-sodium diets are associated with increased mortality: a meta-analysis. *Am J Hypertens.* 2014;27:1129-37. [PMID: 24651634] doi:10.1093/ajh/hpu028
36. He FJ, Li J, Macgregor GA. Effect of longer term modest salt reduction on blood pressure: Cochrane systematic review and meta-analysis of randomised trials. *BMJ.* 2013;346:f1325. [PMID: 23558162] doi:10.1136/bmj.f1325
37. Bray GA, Vollmer WM, Sacks FM, et al; DASH Collaborative Research Group. A further subgroup analysis of the effects of the DASH diet and three dietary sodium levels on blood pressure: results of the DASH-Sodium Trial. *Am J Cardiol.* 2004;94:222-7. [PMID: 15246908]
38. He FJ, Markandu ND, Sagnella GA, et al. Importance of the renin system in determining blood pressure fall with salt restriction in black and white hypertensives. *Hypertension.* 1998;32:820-4. [PMID: 9822438]
39. He FJ, MacGregor GA. How far should salt intake be reduced? *Hypertension.* 2003;42:1093-9. [PMID: 14610100]
40. Huo Y, Li J, Qin X, et al; CSPPT Investigators. Efficacy of folic acid therapy in primary prevention of stroke among adults with hypertension in China: the CSPPT randomized clinical trial. *JAMA.* 2015;313:1325-35. [PMID: 25771069] doi:10.1001/jama.2015.2274
41. Bolland MJ, Grey A, Avenell A, et al. Calcium supplements with or without vitamin D and risk of cardiovascular events: reanalysis of the Women's Health Initiative limited access dataset and meta-analysis. *BMJ.* 2011;342:d2040. [PMID: 21505219] doi:10.1136/bmj.d2040
42. Chin K, Appel LJ, Michos ED. Vitamin D, calcium, and cardiovascular disease: A "D"vantageous or "D"etrimental? An era of uncertainty. *Curr Atheroscler Rep.* 2017;19:5. [PMID: 28127710] doi:10.1007/s11883-017-0637-2
43. Anderson JJ, Kruszka B, Delaney JA, et al. Calcium intake from diet and supplements and the risk of coronary artery calcification and its progression among older adults: 10-year follow-up of the multi-ethnic study of atherosclerosis (MESA). *J Am Heart Assoc.* 2016;5. [PMID: 27729333]
44. Bolland MJ, Avenell A, Baron JA, et al. Effect of calcium supplements on risk of myocardial infarction and cardiovascular events: meta-analysis. *BMJ.* 2010;341:c3691. [PMID: 20671013] doi:10.1136/bmj.c3691
45. Moyer VA; U.S. Preventive Services Task Force. Vitamin, mineral, and multivitamin supplements for the primary prevention of cardiovascular disease and cancer. U.S. Preventive Services Task Force recommendation statement. *Ann Intern Med.* 2014;160:558-64. [PMID: 24566474] doi:10.7326/M14-0198
46. Lichtenstein AH, Appel LJ, Brands M, et al; American Heart Association Nutrition Committee. Diet and Lifestyle Recommendations revision 2006: a scientific statement from the American Heart Association Nutrition Committee. *Circulation.* 2006;114:82-96. [PMID: 16785338]
47. Singh RB, Dubnov G, Niaz MA, et al. Effect of an Indo-Mediterranean diet on progression of coronary artery disease in high risk patients (Indo-Mediterranean Diet Heart Study): a randomised single-blind trial. *Lancet.* 2002;360:1455-61. [PMID: 12433513]
48. Estruch R, Ros E, Salas-Salvadó J, et al; PREDIMED Study Investigators. Primary prevention of cardiovascular disease with a Mediterranean diet supplemented with extra-virgin olive oil or nuts. *N Engl J Med.* 2018;378:e34. [PMID: 29897866] doi:10.1056/NEJMoa1800389
49. Aung T, Halsey J, Kromhout D, et al; Omega-3 Treatment Trialists' Collaboration. Associations of omega-3 fatty acid supplement use with cardiovascular disease risks: meta-analysis of 10 trials involving 77 917 individuals. *JAMA Cardiol.* 2018;3:225-34. [PMID: 29387889] doi:10.1001/jamacardio.2017.5205
50. Nissen SE. U.S. dietary guidelines. An evidence-free zone. *Ann Intern Med.* 2016;164:558-9. [PMID: 26783992] doi:10.7326/M16-0035
51. Schwarzer G, Carpenter JR, Rücker G. Small-study effects in meta-analysis. In: Schwarzer G, Carpenter JR, Rücker G, eds. *Meta-Analysis with R.* Cham, Switzerland: Springer Publishing; 2015: 107-41.

**Current Author Addresses:** Drs. S.U. Khan, M.U. Khan, and Valavoor: West Virginia University, One Medical Center Drive, Morgantown, WV 26508.

Dr. H. Riaz: Cleveland Clinic, 9500 Euclid Avenue, Cleveland, OH 44195.

Drs. Zhao and Guallar: Johns Hopkins Bloomberg School of Public Health, Welch Center, 2024 East Monument Street, Suite 2600, Baltimore, MD 21205.

Drs. Vaughan and Okunrintemi: East Carolina University, 2100 Stantonsburg Road, Greenville, NC 27834.

Drs. I.B. Riaz and Murad: Mayo Clinic, 200 1st Street Southwest, Rochester, MN 55901.

Dr. M.S. Khan: 903 South Ashland Avenue, Apt 1206, Chicago, IL 60607.

Dr. Kaluski: Guthrie Robert Packer Hospital, One Guthrie Square, Sayre, PA 18840.

Dr. Blaha: Johns Hopkins School of Medicine, 600 North Wolfe Street, Blalock 524-D1, Baltimore, MD 21287.

Dr. Michos: Johns Hopkins School of Medicine, 600 North Wolfe Street, Blalock 524-B, Baltimore, MD 21287.

**Author Contributions:** Conception and design: S.U. Khan.

Analysis and interpretation of the data: S.U. Khan, D. Zhao, E. Guallar, E.D. Michos.

Drafting of the article: S.U. Khan, H. Riaz, L. Vaughan, V. Okunrintemi, E. Guallar, E.D. Michos.

Critical revision of the article for important intellectual content: S.U. Khan, I.B. Riaz, M.S. Khan, M.H. Murad, M.J. Blaha, E. Guallar, E.D. Michos.

Final approval of the article: S.U. Khan, M.U. Khan, H. Riaz, S. Valavoor, D. Zhao, L. Vaughan, V. Okunrintemi, I.B. Riaz, M.S. Khan, E. Kaluski, M.H. Murad, M.J. Blaha, E. Guallar, E.D. Michos.

Provision of study materials or patients: S.U. Khan, M.U. Khan, S. Valavoor.

Statistical expertise: S.U. Khan, M.H. Murad, D. Zhao, E. Guallar, E.D. Michos.

Administrative, technical, or logistic support: E.D. Michos.

Collection and assembly of data: S.U. Khan, M.U. Khan, S. Valavoor.
